# Supplementary material for: Termite mound architecture regulates nest temperature and correlates with species identities of symbiotic fungi
Source: PeerJ. 2019 Jan 16;6:e6237. doi: 10.7717/peerj.6237 (PMC6339472; doi:10.7717/peerj.6237)
Supplement: Supplemental Information 4 — Simultaneously measured diurnal mean temperatures at two study sites (Kasigau Road and Maktau) and at the weather station during 7th March 2016–26th October 2016. [file peerj-07-6237-s004.xlsx]

## Sheet: Supplementary_Table_S1
month	day	station_day_mean	site_day_mean	site
Mar_16	7	25.4062	27.1468	Kasigau Road
Mar_16	8	25.6675	27.0837	Kasigau Road
Mar_16	9	24.4825	26.3663	Kasigau Road
Mar_16	10	22.8	24.6861	Kasigau Road
Mar_16	11	25.6275	26.8652	Kasigau Road
Mar_16	12	25.9525	27.6385	Kasigau Road
Mar_16	13	24.9488	26.9668	Kasigau Road
Mar_16	14	25.945	27.2324	Kasigau Road
Mar_16	15	25.4763	27.1382	Kasigau Road
Mar_16	16	25.9275	27.7475	Kasigau Road
Mar_16	17	25.435	27.8645	Kasigau Road
Mar_16	18	26.1588	28.4896	Kasigau Road
Mar_16	19	25.19	28.3956	Kasigau Road
Mar_16	20	26.0987	28.1073	Kasigau Road
Mar_16	21	26.1462	27.8031	Kasigau Road
Mar_16	22	26.2875	27.8182	Kasigau Road
Mar_16	23	26.4812	27.615	Kasigau Road
Mar_16	24	26.2125	27.5132	Kasigau Road
Mar_16	25	24.1187	25.655	Kasigau Road
Mar_16	26	24.5087	26.3575	Kasigau Road
Mar_16	27	25.6337	26.7712	Kasigau Road
Mar_16	28	27.035	27.7159	Kasigau Road
Mar_16	29	26.84	27.9971	Kasigau Road
Mar_16	30	26.7525	28.0987	Kasigau Road
Mar_16	31	26.795	27.4356	Kasigau Road
Apr_16	1	23.6	26.6242	Kasigau Road
Apr_16	2	21.1363	23.1477	Kasigau Road
Apr_16	3	22.3912	23.4991	Kasigau Road
Apr_16	4	21.7763	23.8975	Kasigau Road
Apr_16	5	21.91	23.4994	Kasigau Road
Apr_16	6	23.23	24.8272	Kasigau Road
Apr_16	7	23.1388	25.7954	Kasigau Road
Apr_16	8	23.7325	27.0918	Kasigau Road
Apr_16	9	22.645	25.8738	Kasigau Road
Apr_16	10	22.79	25.5539	Kasigau Road
Apr_16	11	22.3263	24.5774	Kasigau Road
Apr_16	12	22.8375	25.3663	Kasigau Road
Apr_16	13	22.4337	25.2414	Kasigau Road
Apr_16	14	22.4138	25.1631	Kasigau Road
Apr_16	15	22.635	25.1395	Kasigau Road
Apr_16	16	21.3487	21.8816	Kasigau Road
Apr_16	17	22.2563	24.5066	Kasigau Road
Apr_16	18	23.035	25.967	Kasigau Road
Apr_16	19	24.1238	27.0993	Kasigau Road
Apr_16	20	23.9612	26.725	Kasigau Road
Apr_16	21	22.6925	26.1319	Kasigau Road
Apr_16	22	22.8087	27.1781	Kasigau Road
Apr_16	23	23.5688	26.7563	Kasigau Road
Apr_16	24	23.6313	26.0614	Kasigau Road
Apr_16	25	22.8388	26.5218	Kasigau Road
Apr_16	26	22.6112	24.8036	Kasigau Road
Apr_16	27	22.1962	24.4518	Kasigau Road
Apr_16	28	21.6225	23.5227	Kasigau Road
Apr_16	29	21.665	24.5064	Kasigau Road
Apr_16	30	22.2037	24.0225	Kasigau Road
May_16	1	22.7125	25.811	Kasigau Road
May_16	2	22.5625	26.1077	Kasigau Road
May_16	3	22.8163	25.8265	Kasigau Road
May_16	4	23.2712	26.1231	Kasigau Road
May_16	5	21.7812	23.9054	Kasigau Road
May_16	6	21.5587	24.6	Kasigau Road
May_16	7	21.0862	23.9277	Kasigau Road
May_16	8	21.5175	24.4431	Kasigau Road
May_16	9	20.9387	23.506	Kasigau Road
May_16	10	19.5475	22.1393	Kasigau Road
May_16	11	20.9775	22.8421	Kasigau Road
May_16	12	21.1	24.0765	Kasigau Road
May_16	13	20.8425	24.2952	Kasigau Road
May_16	14	21.3588	24.9672	Kasigau Road
May_16	15	22.055	25.4668	Kasigau Road
May_16	16	22.3113	25.5843	Kasigau Road
May_16	17	23.0237	26.3029	Kasigau Road
May_16	18	22.0237	24.7643	Kasigau Road
May_16	19	21.0487	23.9827	Kasigau Road
May_16	20	21.4838	24.7405	Kasigau Road
May_16	21	19.6737	23.0069	Kasigau Road
May_16	22	21.43	23.4438	Kasigau Road
May_16	23	20.1038	23.1549	Kasigau Road
May_16	24	20.7087	24.3182	Kasigau Road
May_16	25	21.3113	23.5529	Kasigau Road
May_16	26	20.2162	22.9977	Kasigau Road
May_16	27	20.5525	23.2007	Kasigau Road
May_16	28	20.7425	24.0526	Kasigau Road
May_16	29	20.8375	24.154	Kasigau Road
May_16	30	21.705	24.4123	Kasigau Road
May_16	31	22.4312	24.0379	Kasigau Road
Jun_16	1	22.3	24.8186	Kasigau Road
Jun_16	2	22.3813	24.2482	Kasigau Road
Jun_16	3	21.0038	23.2018	Kasigau Road
Jun_16	4	21.8425	24.0293	Kasigau Road
Jun_16	5	22.0562	24.6776	Kasigau Road
Jun_16	6	21.8225	24.8499	Kasigau Road
Jun_16	7	21.6487	24.0837	Kasigau Road
Jun_16	8	21.0125	23.5995	Kasigau Road
Jun_16	9	20.4988	22.6775	Kasigau Road
Jun_16	10	20.6612	23.2475	Kasigau Road
Jun_16	11	20.5525	22.522	Kasigau Road
Jun_16	12	20.93	23.0297	Kasigau Road
Jun_16	13	20.1025	23.1621	Kasigau Road
Jun_16	14	20.625	23.458	Kasigau Road
Jun_16	15	21.3287	23.9901	Kasigau Road
Jun_16	16	21.255	23.8107	Kasigau Road
Jun_16	17	21.2188	24.0449	Kasigau Road
Jun_16	18	21.5725	23.1782	Kasigau Road
Jun_16	19	21.4763	23.4906	Kasigau Road
Jun_16	20	20.8388	23.2801	Kasigau Road
Jun_16	21	20.1638	21.5135	Kasigau Road
Jun_16	22	19.2075	21.2089	Kasigau Road
Jun_16	23	20.4887	22.3263	Kasigau Road
Jun_16	24	19.5562	22.2791	Kasigau Road
Jun_16	25	19.815	21.4902	Kasigau Road
Jun_16	26	20.495	22.2011	Kasigau Road
Jun_16	27	20.6187	22.5214	Kasigau Road
Jun_16	28	20.8287	23.3493	Kasigau Road
Jun_16	29	20.0275	22.4902	Kasigau Road
Jun_16	30	20.15	22.9195	Kasigau Road
Jul_16	1	19.8837	22.6695	Kasigau Road
Jul_16	2	20.3137	22.4826	Kasigau Road
Jul_16	3	20.1762	22.2948	Kasigau Road
Jul_16	4	19.89	22.6531	Kasigau Road
Jul_16	5	19.44	21.896	Kasigau Road
Jul_16	6	19.0613	20.7866	Kasigau Road
Jul_16	7	18.6625	21.0359	Kasigau Road
Jul_16	8	18.39	20.5286	Kasigau Road
Jul_16	9	18.3225	20.7542	Kasigau Road
Jul_16	10	18.625	21.1301	Kasigau Road
Jul_16	11	18.1837	20.7862	Kasigau Road
Jul_16	12	17.61	20.059	Kasigau Road
Jul_16	13	18.3775	21.5916	Kasigau Road
Jul_16	14	18.8762	21.598	Kasigau Road
Jul_16	15	18.3012	20.4269	Kasigau Road
Jul_16	16	19.4025	21.6698	Kasigau Road
Jul_16	17	20.2263	22.4431	Kasigau Road
Jul_16	18	19.105	22.0211	Kasigau Road
Jul_16	19	19.625	21.6849	Kasigau Road
Jul_16	20	19.5463	22.1531	Kasigau Road
Jul_16	21	19.75	22.2084	Kasigau Road
Jul_16	22	20.445	23.1073	Kasigau Road
Jul_16	23	20.9175	23.1532	Kasigau Road
Jul_16	24	20.3725	22.7869	Kasigau Road
Jul_16	25	20.225	22.1388	Kasigau Road
Jul_16	26	20.2375	22.9586	Kasigau Road
Jul_16	27	21.0712	22.7714	Kasigau Road
Jul_16	28	20.1262	22.2005	Kasigau Road
Jul_16	29	20.8538	22.4275	Kasigau Road
Jul_16	30	20.4413	22.6999	Kasigau Road
Jul_16	31	20.2987	22.7076	Kasigau Road
Aug_16	1	20.0987	21.9503	Kasigau Road
Aug_16	2	20.0487	22.4024	Kasigau Road
Aug_16	3	20.255	22.2467	Kasigau Road
Aug_16	4	20.6425	22.2794	Kasigau Road
Aug_16	5	18.55	21.2479	Kasigau Road
Aug_16	6	19.7525	21.8964	Kasigau Road
Aug_16	7	19.2063	21.6307	Kasigau Road
Aug_16	8	19.4612	20.3414	Kasigau Road
Aug_16	9	18.4937	20.4344	Kasigau Road
Aug_16	10	18.6962	21.919	Kasigau Road
Aug_16	11	19.5963	21.8648	Kasigau Road
Aug_16	12	19.36	21.8959	Kasigau Road
Aug_16	13	20.1863	21.5761	Kasigau Road
Aug_16	14	19.4625	20.9589	Kasigau Road
Aug_16	15	19.3813	19.8642	Kasigau Road
Aug_16	16	18.9325	20.622	Kasigau Road
Aug_16	17	20.84	23.044	Kasigau Road
Aug_16	18	20.09	22.5446	Kasigau Road
Aug_16	19	21.0437	23.1618	Kasigau Road
Aug_16	20	20.5775	22.8339	Kasigau Road
Aug_16	21	19.8212	21.9653	Kasigau Road
Aug_16	22	21.0837	23.3568	Kasigau Road
Aug_16	23	20.6388	22.5131	Kasigau Road
Aug_16	24	19.3788	21.7159	Kasigau Road
Aug_16	25	18.64	21.7006	Kasigau Road
Aug_16	26	19.045	20.4966	Kasigau Road
Aug_16	27	19.5113	21.5912	Kasigau Road
Aug_16	28	20.3087	21.3021	Kasigau Road
Aug_16	29	18.4763	19.4498	Kasigau Road
Aug_16	30	18.8562	21.0746	Kasigau Road
Aug_16	31	19.675	21.5204	Kasigau Road
Sep_16	1	17.1863	19.9344	Kasigau Road
Sep_16	2	18.7288	19.6137	Kasigau Road
Sep_16	3	19.3275	20.794	Kasigau Road
Sep_16	4	19.7475	21.4193	Kasigau Road
Sep_16	5	18.9237	20.6534	Kasigau Road
Sep_16	6	19.8087	21.3024	Kasigau Road
Sep_16	7	19.5225	21.3101	Kasigau Road
Sep_16	8	20.5338	22.372	Kasigau Road
Sep_16	9	21.0388	22.2636	Kasigau Road
Sep_16	10	18.7987	20.9195	Kasigau Road
Sep_16	11	20.415	22.7476	Kasigau Road
Sep_16	12	21.3438	23.3182	Kasigau Road
Sep_16	13	19.9638	22.3099	Kasigau Road
Sep_16	14	19.2525	21.3418	Kasigau Road
Sep_16	15	21.3012	22.6766	Kasigau Road
Sep_16	16	20.8562	21.8181	Kasigau Road
Sep_16	17	21.23	22.7706	Kasigau Road
Sep_16	18	20.0625	22.8023	Kasigau Road
Sep_16	19	20.4112	22.4581	Kasigau Road
Sep_16	20	19.76	21.841	Kasigau Road
Sep_16	21	20.31	22.2631	Kasigau Road
Sep_16	22	19.995	21.7787	Kasigau Road
Sep_16	23	20.5813	21.8491	Kasigau Road
Sep_16	24	20.7087	22.6389	Kasigau Road
Sep_16	25	21.785	23.1856	Kasigau Road
Sep_16	26	21.3412	23.0761	Kasigau Road
Sep_16	27	20.9325	22.6852	Kasigau Road
Sep_16	28	21.4112	22.4829	Kasigau Road
Sep_16	29	20.5487	21.6151	Kasigau Road
Sep_16	30	21.69	22.9039	Kasigau Road
Oct_16	1	20.7413	21.8098	Kasigau Road
Oct_16	2	20.2787	22.1468	Kasigau Road
Oct_16	3	22.7162	24.404	Kasigau Road
Oct_16	4	22.3788	23.8029	Kasigau Road
Oct_16	5	21.5125	22.9595	Kasigau Road
Oct_16	6	21.2888	23.2323	Kasigau Road
Oct_16	7	23.1187	24.6234	Kasigau Road
Oct_16	8	22.6612	23.8962	Kasigau Road
Oct_16	9	22.755	23.6385	Kasigau Road
Oct_16	10	22.0425	24.1156	Kasigau Road
Oct_16	11	22.8525	24.6621	Kasigau Road
Oct_16	12	21.6913	23.4356	Kasigau Road
Oct_16	13	22.0975	23.6611	Kasigau Road
Oct_16	14	22.1725	23.4981	Kasigau Road
Oct_16	15	22.275	23.6146	Kasigau Road
Oct_16	16	21.8625	23.8254	Kasigau Road
Oct_16	17	21.9862	23.5993	Kasigau Road
Oct_16	18	22.405	24.4743	Kasigau Road
Oct_16	19	21.885	23.0684	Kasigau Road
Oct_16	20	21.9387	23.5291	Kasigau Road
Oct_16	21	21.7437	22.8104	Kasigau Road
Oct_16	22	22.2613	23.7003	Kasigau Road
Oct_16	23	23.0025	24.427	Kasigau Road
Oct_16	24	21.9675	24.4746	Kasigau Road
Oct_16	25	21.9537	23.5999	Kasigau Road
Oct_16	26	23.06	24.9047	Kasigau Road
Mar_16	7	25.4062	24.0889	Maktau
Mar_16	8	25.6675	23.2916	Maktau
Mar_16	9	24.4825	22.8935	Maktau
Mar_16	10	22.8	22.0959	Maktau
Mar_16	11	25.6275	24.2456	Maktau
Mar_16	12	25.9525	24.7695	Maktau
Mar_16	13	24.9488	24.378	Maktau
Mar_16	14	25.945	24.9249	Maktau
Mar_16	15	25.4763	24.6441	Maktau
Mar_16	16	25.9275	25.1514	Maktau
Mar_16	17	25.435	25.3468	Maktau
Mar_16	18	26.1588	24.6524	Maktau
Mar_16	19	25.19	25.2765	Maktau
Mar_16	20	26.0987	25.5735	Maktau
Mar_16	21	26.1462	24.7069	Maktau
Mar_16	22	26.2875	24.8156	Maktau
Mar_16	23	26.4812	25.1906	Maktau
Mar_16	24	26.2125	24.4952	Maktau
Mar_16	25	24.1187	22.7533	Maktau
Mar_16	26	24.5087	23.0572	Maktau
Mar_16	27	25.6337	24.3234	Maktau
Mar_16	28	27.035	25.4709	Maktau
Mar_16	29	26.84	25.1515	Maktau
Mar_16	30	26.7525	25.2922	Maktau
Mar_16	31	26.795	25.5269	Maktau
Apr_16	1	23.6	22.1445	Maktau
Apr_16	2	21.1363	20.2361	Maktau
Apr_16	3	22.3912	21.5185	Maktau
Apr_16	4	21.7763	21.1504	Maktau
Apr_16	5	21.91	21.0881	Maktau
Apr_16	6	23.23	22.6756	Maktau
Apr_16	7	23.1388	22.6045	Maktau
Apr_16	8	23.7325	23.1984	Maktau
Apr_16	9	22.645	22.0415	Maktau
Apr_16	10	22.79	22.0179	Maktau
Apr_16	11	22.3263	21.4477	Maktau
Apr_16	12	22.8375	21.4557	Maktau
Apr_16	13	22.4337	21.5961	Maktau
Apr_16	14	22.4138	21.1819	Maktau
Apr_16	15	22.635	21.3302	Maktau
Apr_16	16	21.3487	20.1732	Maktau
Apr_16	17	22.2563	21.3224	Maktau
Apr_16	18	23.035	22.0023	Maktau
Apr_16	19	24.1238	23.2138	Maktau
Apr_16	20	23.9612	23.0894	Maktau
Apr_16	21	22.6925	22.1906	Maktau
Apr_16	22	22.8087	22.1594	Maktau
Apr_16	23	23.5688	22.6756	Maktau
Apr_16	24	23.6313	22.6515	Maktau
Apr_16	25	22.8388	21.6429	Maktau
Apr_16	26	22.6112	21.5175	Maktau
Apr_16	27	22.1962	21.2756	Maktau
Apr_16	28	21.6225	20.8528	Maktau
Apr_16	29	21.665	21.0484	Maktau
Apr_16	30	22.2037	21.0954	Maktau
May_16	1	22.7125	21.6737	Maktau
May_16	2	22.5625	22.0095	Maktau
May_16	3	22.8163	21.9157	Maktau
May_16	4	23.2712	22.5569	Maktau
May_16	5	21.7812	20.6031	Maktau
May_16	6	21.5587	20.5789	Maktau
May_16	7	21.0862	20.1481	Maktau
May_16	8	21.5175	20.4842	Maktau
May_16	9	20.9387	19.5464	Maktau
May_16	10	19.5475	18.4356	Maktau
May_16	11	20.9775	19.4289	Maktau
May_16	12	21.1	20.2419	Maktau
May_16	13	20.8425	19.867	Maktau
May_16	14	21.3588	20.3755	Maktau
May_16	15	22.055	20.9067	Maktau
May_16	16	22.3113	21.2978	Maktau
May_16	17	23.0237	21.9474	Maktau
May_16	18	22.0237	20.759	Maktau
May_16	19	21.0487	20.1722	Maktau
May_16	20	21.4838	20.1872	Maktau
May_16	21	19.6737	18.6551	Maktau
May_16	22	21.43	20.0545	Maktau
May_16	23	20.1038	18.9204	Maktau
May_16	24	20.7087	19.4596	Maktau
May_16	25	21.3113	19.9991	Maktau
May_16	26	20.2162	18.8185	Maktau
May_16	27	20.5525	19.084	Maktau
May_16	28	20.7425	19.7564	Maktau
May_16	29	20.8375	20.2572	Maktau
May_16	30	21.705	20.5545	Maktau
May_16	31	22.4312	20.8521	Maktau
Jun_16	1	22.3	20.8212	Maktau
Jun_16	2	22.3813	20.7741	Maktau
Jun_16	3	21.0038	20.0235	Maktau
Jun_16	4	21.8425	20.3049	Maktau
Jun_16	5	22.0562	20.3984	Maktau
Jun_16	6	21.8225	20.6175	Maktau
Jun_16	7	21.6487	20.2731	Maktau
Jun_16	8	21.0125	19.6393	Maktau
Jun_16	9	20.4988	18.9274	Maktau
Jun_16	10	20.6612	19.0916	Maktau
Jun_16	11	20.5525	18.9127	Maktau
Jun_16	12	20.93	19.515	Maktau
Jun_16	13	20.1025	18.5834	Maktau
Jun_16	14	20.625	19.5368	Maktau
Jun_16	15	21.3287	19.9596	Maktau
Jun_16	16	21.255	19.71	Maktau
Jun_16	17	21.2188	19.9208	Maktau
Jun_16	18	21.5725	20.1408	Maktau
Jun_16	19	21.4763	20.1953	Maktau
Jun_16	20	20.8388	19.2022	Maktau
Jun_16	21	20.1638	18.6227	Maktau
Jun_16	22	19.2075	17.6373	Maktau
Jun_16	23	20.4887	19.0529	Maktau
Jun_16	24	19.5562	18.1299	Maktau
Jun_16	25	19.815	17.9735	Maktau
Jun_16	26	20.495	18.8729	Maktau
Jun_16	27	20.6187	18.9824	Maktau
Jun_16	28	20.8287	19.5525	Maktau
Jun_16	29	20.0275	18.2941	Maktau
Jun_16	30	20.15	18.7707	Maktau
Jul_16	1	19.8837	18.6299	Maktau
Jul_16	2	20.3137	18.9356	Maktau
Jul_16	3	20.1762	18.294	Maktau
Jul_16	4	19.89	18.7616	Maktau
Jul_16	5	19.44	18.1681	Maktau
Jul_16	6	19.0613	17.3625	Maktau
Jul_16	7	18.6625	17.1435	Maktau
Jul_16	8	18.39	16.9086	Maktau
Jul_16	9	18.3225	16.8925	Maktau
Jul_16	10	18.625	17.1351	Maktau
Jul_16	11	18.1837	17.1981	Maktau
Jul_16	12	17.61	16.3292	Maktau
Jul_16	13	18.3775	17.0726	Maktau
Jul_16	14	18.8762	17.7764	Maktau
Jul_16	15	18.3012	17.1666	Maktau
Jul_16	16	19.4025	17.621	Maktau
Jul_16	17	20.2263	18.5834	Maktau
Jul_16	18	19.105	17.707	Maktau
Jul_16	19	19.625	18.0978	Maktau
Jul_16	20	19.5463	18.418	Maktau
Jul_16	21	19.75	18.5675	Maktau
Jul_16	22	20.445	19.107	Maktau
Jul_16	23	20.9175	19.9439	Maktau
Jul_16	24	20.3725	18.9814	Maktau
Jul_16	25	20.225	18.5448	Maktau
Jul_16	26	20.2375	18.7074	Maktau
Jul_16	27	21.0712	19.3496	Maktau
Jul_16	28	20.1262	18.9894	Maktau
Jul_16	29	20.8538	19.2016	Maktau
Jul_16	30	20.4413	19.4745	Maktau
Jul_16	31	20.2987	19.1137	Maktau
Aug_16	1	20.0987	18.8564	Maktau
Aug_16	2	20.0487	19.3091	Maktau
Aug_16	3	20.255	19.2937	Maktau
Aug_16	4	20.6425	19.1465	Maktau
Aug_16	5	18.55	17.1354	Maktau
Aug_16	6	19.7525	18.0437	Maktau
Aug_16	7	19.2063	17.6286	Maktau
Aug_16	8	19.4612	17.5821	Maktau
Aug_16	9	18.4937	16.9013	Maktau
Aug_16	10	18.6962	17.5885	Maktau
Aug_16	11	19.5963	18.0434	Maktau
Aug_16	12	19.36	18.0663	Maktau
Aug_16	13	20.1863	18.5837	Maktau
Aug_16	14	19.4625	18.646	Maktau
Aug_16	15	19.3813	17.6606	Maktau
Aug_16	16	18.9325	17.1513	Maktau
Aug_16	17	20.84	19.74	Maktau
Aug_16	18	20.09	19.2006	Maktau
Aug_16	19	21.0437	19.6151	Maktau
Aug_16	20	20.5775	19.3184	Maktau
Aug_16	21	19.8212	19.0594	Maktau
Aug_16	22	21.0837	19.5763	Maktau
Aug_16	23	20.6388	18.7	Maktau
Aug_16	24	19.3788	17.9564	Maktau
Aug_16	25	18.64	17.8081	Maktau
Aug_16	26	19.045	17.5502	Maktau
Aug_16	27	19.5113	18.2386	Maktau
Aug_16	28	20.3087	18.5831	Maktau
Aug_16	29	18.4763	17.3227	Maktau
Aug_16	30	18.8562	17.2829	Maktau
Aug_16	31	19.675	18.5904	Maktau
Sep_16	1	17.1863	16.1646	Maktau
Sep_16	2	18.7288	17.2527	Maktau
Sep_16	3	19.3275	17.4091	Maktau
Sep_16	4	19.7475	18.5745	Maktau
Sep_16	5	18.9237	17.0572	Maktau
Sep_16	6	19.8087	18.6221	Maktau
Sep_16	7	19.5225	17.5901	Maktau
Sep_16	8	20.5338	19.3561	Maktau
Sep_16	9	21.0388	19.1231	Maktau
Sep_16	10	18.7987	17.4954	Maktau
Sep_16	11	20.415	18.9267	Maktau
Sep_16	12	21.3438	19.3655	Maktau
Sep_16	13	19.9638	18.7542	Maktau
Sep_16	14	19.2525	17.7544	Maktau
Sep_16	15	21.3012	19.6939	Maktau
Sep_16	16	20.8562	18.748	Maktau
Sep_16	17	21.23	NA	Maktau
Sep_16	18	20.0625	NA	Maktau
Sep_16	19	20.4112	NA	Maktau
Sep_16	20	19.76	NA	Maktau
Sep_16	21	20.31	NA	Maktau
Sep_16	22	19.995	NA	Maktau
Sep_16	23	20.5813	NA	Maktau
Sep_16	24	20.7087	NA	Maktau
Sep_16	25	21.785	NA	Maktau
Sep_16	26	21.3412	NA	Maktau
Sep_16	27	20.9325	NA	Maktau
Sep_16	28	21.4112	NA	Maktau
Sep_16	29	20.5487	NA	Maktau
Sep_16	30	21.69	NA	Maktau
Oct_16	1	20.7413	NA	Maktau
Oct_16	2	20.2787	NA	Maktau
Oct_16	3	22.7162	NA	Maktau
Oct_16	4	22.3788	NA	Maktau
Oct_16	5	21.5125	NA	Maktau
Oct_16	6	21.2888	NA	Maktau
Oct_16	7	23.1187	NA	Maktau
Oct_16	8	22.6612	NA	Maktau
Oct_16	9	22.755	NA	Maktau
Oct_16	10	22.0425	NA	Maktau
Oct_16	11	22.8525	NA	Maktau
Oct_16	12	21.6913	NA	Maktau
Oct_16	13	22.0975	NA	Maktau
Oct_16	14	22.1725	NA	Maktau
Oct_16	15	22.275	NA	Maktau
Oct_16	16	21.8625	NA	Maktau
Oct_16	17	21.9862	NA	Maktau
Oct_16	18	22.405	NA	Maktau
Oct_16	19	21.885	NA	Maktau
Oct_16	20	21.9387	NA	Maktau
Oct_16	21	21.7437	NA	Maktau
Oct_16	22	22.2613	NA	Maktau
Oct_16	23	23.0025	NA	Maktau
Oct_16	24	21.9675	NA	Maktau
Oct_16	25	21.9537	NA	Maktau
Oct_16	26	23.06	NA	Maktau
