# Supplementary material for: Termite mound architecture regulates nest temperature and correlates with species identities of symbiotic fungi
Source: PeerJ. 2019 Jan 16;6:e6237. doi: 10.7717/peerj.6237 (PMC6339472; doi:10.7717/peerj.6237)
Supplement: Supplemental Information 5 — Simultaneously measured temperatures (24 measurements per day) in fungal chambers of two open (TS14, TS56) and two closed (TS18, TS19) termite mounds and the ambient air at Salt Lick study site during four months (Feb, Mar, Jun, Jul) in 2015. [file peerj-07-6237-s005.xlsx]

## Sheet: Campaign1_Temperatures_in_open_
time	month	day	name	type	temperature
0	Feb	1	TS14	open	28.969
1	Feb	1	TS14	open	28.907
2	Feb	1	TS14	open	28.844
3	Feb	1	TS14	open	28.844
4	Feb	1	TS14	open	28.907
5	Feb	1	TS14	open	28.907
6	Feb	1	TS14	open	28.907
7	Feb	1	TS14	open	28.844
8	Feb	1	TS14	open	28.782
9	Feb	1	TS14	open	28.657
10	Feb	1	TS14	open	28.595
11	Feb	1	TS14	open	28.47
12	Feb	1	TS14	open	28.407
13	Feb	1	TS14	open	28.407
14	Feb	1	TS14	open	28.407
15	Feb	1	TS14	open	28.407
16	Feb	1	TS14	open	28.532
17	Feb	1	TS14	open	28.595
18	Feb	1	TS14	open	28.72
19	Feb	1	TS14	open	28.844
20	Feb	1	TS14	open	28.907
21	Feb	1	TS14	open	28.969
22	Feb	1	TS14	open	29.032
23	Feb	1	TS14	open	29.094
0	Feb	2	TS14	open	29.157
1	Feb	2	TS14	open	29.157
2	Feb	2	TS14	open	29.157
3	Feb	2	TS14	open	29.157
4	Feb	2	TS14	open	29.094
5	Feb	2	TS14	open	28.969
6	Feb	2	TS14	open	28.907
7	Feb	2	TS14	open	28.844
8	Feb	2	TS14	open	28.782
9	Feb	2	TS14	open	28.72
10	Feb	2	TS14	open	28.595
11	Feb	2	TS14	open	28.47
12	Feb	2	TS14	open	28.345
13	Feb	2	TS14	open	28.345
14	Feb	2	TS14	open	28.345
15	Feb	2	TS14	open	28.407
16	Feb	2	TS14	open	28.47
17	Feb	2	TS14	open	28.532
18	Feb	2	TS14	open	28.657
19	Feb	2	TS14	open	28.782
20	Feb	2	TS14	open	28.844
21	Feb	2	TS14	open	28.907
22	Feb	2	TS14	open	28.969
23	Feb	2	TS14	open	29.032
0	Feb	3	TS14	open	29.094
1	Feb	3	TS14	open	29.094
2	Feb	3	TS14	open	29.094
3	Feb	3	TS14	open	29.157
4	Feb	3	TS14	open	29.157
5	Feb	3	TS14	open	29.157
6	Feb	3	TS14	open	29.157
7	Feb	3	TS14	open	29.094
8	Feb	3	TS14	open	29.032
9	Feb	3	TS14	open	28.969
10	Feb	3	TS14	open	28.844
11	Feb	3	TS14	open	28.782
12	Feb	3	TS14	open	28.72
13	Feb	3	TS14	open	28.657
14	Feb	3	TS14	open	28.72
15	Feb	3	TS14	open	28.72
16	Feb	3	TS14	open	28.782
17	Feb	3	TS14	open	28.844
18	Feb	3	TS14	open	28.969
19	Feb	3	TS14	open	29.032
20	Feb	3	TS14	open	29.032
21	Feb	3	TS14	open	29.094
22	Feb	3	TS14	open	29.094
23	Feb	3	TS14	open	29.094
0	Feb	4	TS14	open	29.094
1	Feb	4	TS14	open	29.094
2	Feb	4	TS14	open	29.094
3	Feb	4	TS14	open	29.094
4	Feb	4	TS14	open	29.032
5	Feb	4	TS14	open	28.969
6	Feb	4	TS14	open	28.907
7	Feb	4	TS14	open	28.844
8	Feb	4	TS14	open	28.72
9	Feb	4	TS14	open	28.595
10	Feb	4	TS14	open	28.47
11	Feb	4	TS14	open	28.407
12	Feb	4	TS14	open	28.345
13	Feb	4	TS14	open	28.282
14	Feb	4	TS14	open	28.282
15	Feb	4	TS14	open	28.22
16	Feb	4	TS14	open	28.282
17	Feb	4	TS14	open	28.345
18	Feb	4	TS14	open	28.47
19	Feb	4	TS14	open	28.595
20	Feb	4	TS14	open	28.657
21	Feb	4	TS14	open	28.72
22	Feb	4	TS14	open	28.72
23	Feb	4	TS14	open	28.72
0	Feb	5	TS14	open	28.782
1	Feb	5	TS14	open	28.782
2	Feb	5	TS14	open	28.782
3	Feb	5	TS14	open	28.72
4	Feb	5	TS14	open	28.72
5	Feb	5	TS14	open	28.72
6	Feb	5	TS14	open	28.657
7	Feb	5	TS14	open	28.595
8	Feb	5	TS14	open	28.47
9	Feb	5	TS14	open	28.407
10	Feb	5	TS14	open	28.345
11	Feb	5	TS14	open	28.282
12	Feb	5	TS14	open	28.22
13	Feb	5	TS14	open	28.157
14	Feb	5	TS14	open	28.157
15	Feb	5	TS14	open	28.157
16	Feb	5	TS14	open	28.282
17	Feb	5	TS14	open	28.407
18	Feb	5	TS14	open	28.532
19	Feb	5	TS14	open	28.657
20	Feb	5	TS14	open	28.844
21	Feb	5	TS14	open	28.907
22	Feb	5	TS14	open	28.969
23	Feb	5	TS14	open	28.969
0	Feb	6	TS14	open	29.032
1	Feb	6	TS14	open	29.094
2	Feb	6	TS14	open	29.094
3	Feb	6	TS14	open	29.094
4	Feb	6	TS14	open	29.032
5	Feb	6	TS14	open	28.969
6	Feb	6	TS14	open	28.907
7	Feb	6	TS14	open	28.782
8	Feb	6	TS14	open	28.72
9	Feb	6	TS14	open	28.595
10	Feb	6	TS14	open	28.47
11	Feb	6	TS14	open	28.345
12	Feb	6	TS14	open	28.22
13	Feb	6	TS14	open	28.095
14	Feb	6	TS14	open	28.095
15	Feb	6	TS14	open	28.095
16	Feb	6	TS14	open	28.157
17	Feb	6	TS14	open	28.282
18	Feb	6	TS14	open	28.407
19	Feb	6	TS14	open	28.532
20	Feb	6	TS14	open	28.657
21	Feb	6	TS14	open	28.782
22	Feb	6	TS14	open	28.907
23	Feb	6	TS14	open	28.969
0	Feb	7	TS14	open	28.969
1	Feb	7	TS14	open	28.969
2	Feb	7	TS14	open	28.969
3	Feb	7	TS14	open	28.969
4	Feb	7	TS14	open	28.969
5	Feb	7	TS14	open	28.969
6	Feb	7	TS14	open	28.969
7	Feb	7	TS14	open	28.907
8	Feb	7	TS14	open	28.844
9	Feb	7	TS14	open	28.782
10	Feb	7	TS14	open	28.72
11	Feb	7	TS14	open	28.595
12	Feb	7	TS14	open	28.595
13	Feb	7	TS14	open	28.532
14	Feb	7	TS14	open	28.532
15	Feb	7	TS14	open	28.595
16	Feb	7	TS14	open	28.72
17	Feb	7	TS14	open	28.844
18	Feb	7	TS14	open	28.969
19	Feb	7	TS14	open	29.032
20	Feb	7	TS14	open	29.094
21	Feb	7	TS14	open	29.157
22	Feb	7	TS14	open	29.219
23	Feb	7	TS14	open	29.219
0	Feb	8	TS14	open	29.282
1	Feb	8	TS14	open	29.282
2	Feb	8	TS14	open	29.282
3	Feb	8	TS14	open	29.282
4	Feb	8	TS14	open	29.219
5	Feb	8	TS14	open	29.219
6	Feb	8	TS14	open	29.157
7	Feb	8	TS14	open	29.094
8	Feb	8	TS14	open	29.032
9	Feb	8	TS14	open	28.969
10	Feb	8	TS14	open	28.907
11	Feb	8	TS14	open	28.844
12	Feb	8	TS14	open	28.782
13	Feb	8	TS14	open	28.782
14	Feb	8	TS14	open	28.782
15	Feb	8	TS14	open	28.782
16	Feb	8	TS14	open	28.782
17	Feb	8	TS14	open	28.844
18	Feb	8	TS14	open	28.907
19	Feb	8	TS14	open	28.907
20	Feb	8	TS14	open	28.969
21	Feb	8	TS14	open	28.969
22	Feb	8	TS14	open	28.969
23	Feb	8	TS14	open	28.969
0	Feb	9	TS14	open	28.969
1	Feb	9	TS14	open	28.969
2	Feb	9	TS14	open	28.907
3	Feb	9	TS14	open	28.844
4	Feb	9	TS14	open	28.782
5	Feb	9	TS14	open	28.657
6	Feb	9	TS14	open	28.595
7	Feb	9	TS14	open	28.47
8	Feb	9	TS14	open	28.345
9	Feb	9	TS14	open	28.157
10	Feb	9	TS14	open	28.033
11	Feb	9	TS14	open	27.908
12	Feb	9	TS14	open	27.783
13	Feb	9	TS14	open	27.783
14	Feb	9	TS14	open	27.783
15	Feb	9	TS14	open	27.845
16	Feb	9	TS14	open	27.97
17	Feb	9	TS14	open	28.033
18	Feb	9	TS14	open	28.157
19	Feb	9	TS14	open	28.282
20	Feb	9	TS14	open	28.345
21	Feb	9	TS14	open	28.407
22	Feb	9	TS14	open	28.47
23	Feb	9	TS14	open	28.532
0	Feb	10	TS14	open	28.532
1	Feb	10	TS14	open	28.532
2	Feb	10	TS14	open	28.47
3	Feb	10	TS14	open	28.407
4	Feb	10	TS14	open	28.407
5	Feb	10	TS14	open	28.345
6	Feb	10	TS14	open	28.345
7	Feb	10	TS14	open	28.282
8	Feb	10	TS14	open	28.282
9	Feb	10	TS14	open	28.22
10	Feb	10	TS14	open	28.157
11	Feb	10	TS14	open	28.157
12	Feb	10	TS14	open	28.157
13	Feb	10	TS14	open	28.157
14	Feb	10	TS14	open	28.157
15	Feb	10	TS14	open	28.157
16	Feb	10	TS14	open	28.157
17	Feb	10	TS14	open	28.22
18	Feb	10	TS14	open	28.282
19	Feb	10	TS14	open	28.282
20	Feb	10	TS14	open	28.345
21	Feb	10	TS14	open	28.407
22	Feb	10	TS14	open	28.47
23	Feb	10	TS14	open	28.532
0	Feb	11	TS14	open	28.532
1	Feb	11	TS14	open	28.532
2	Feb	11	TS14	open	28.532
3	Feb	11	TS14	open	28.595
4	Feb	11	TS14	open	28.595
5	Feb	11	TS14	open	28.595
6	Feb	11	TS14	open	28.532
7	Feb	11	TS14	open	28.47
8	Feb	11	TS14	open	28.345
9	Feb	11	TS14	open	28.282
10	Feb	11	TS14	open	28.157
11	Feb	11	TS14	open	28.033
12	Feb	11	TS14	open	27.908
13	Feb	11	TS14	open	27.845
14	Feb	11	TS14	open	27.845
15	Feb	11	TS14	open	27.908
16	Feb	11	TS14	open	27.97
17	Feb	11	TS14	open	28.157
18	Feb	11	TS14	open	28.282
19	Feb	11	TS14	open	28.407
20	Feb	11	TS14	open	28.532
21	Feb	11	TS14	open	28.657
22	Feb	11	TS14	open	28.72
23	Feb	11	TS14	open	28.844
0	Feb	12	TS14	open	28.844
1	Feb	12	TS14	open	28.844
2	Feb	12	TS14	open	28.844
3	Feb	12	TS14	open	28.844
4	Feb	12	TS14	open	28.907
5	Feb	12	TS14	open	28.907
6	Feb	12	TS14	open	28.907
7	Feb	12	TS14	open	28.844
8	Feb	12	TS14	open	28.844
9	Feb	12	TS14	open	28.782
10	Feb	12	TS14	open	28.782
11	Feb	12	TS14	open	28.782
12	Feb	12	TS14	open	28.782
13	Feb	12	TS14	open	28.72
14	Feb	12	TS14	open	28.782
15	Feb	12	TS14	open	28.782
16	Feb	12	TS14	open	28.907
17	Feb	12	TS14	open	29.032
18	Feb	12	TS14	open	29.094
19	Feb	12	TS14	open	29.219
20	Feb	12	TS14	open	29.282
21	Feb	12	TS14	open	29.344
22	Feb	12	TS14	open	29.407
23	Feb	12	TS14	open	29.469
0	Feb	13	TS14	open	29.469
1	Feb	13	TS14	open	29.469
2	Feb	13	TS14	open	29.407
3	Feb	13	TS14	open	29.469
4	Feb	13	TS14	open	29.469
5	Feb	13	TS14	open	29.469
6	Feb	13	TS14	open	29.469
7	Feb	13	TS14	open	29.407
8	Feb	13	TS14	open	29.344
9	Feb	13	TS14	open	29.219
10	Feb	13	TS14	open	29.157
11	Feb	13	TS14	open	29.032
12	Feb	13	TS14	open	28.969
13	Feb	13	TS14	open	28.969
14	Feb	13	TS14	open	28.969
15	Feb	13	TS14	open	28.969
16	Feb	13	TS14	open	29.032
17	Feb	13	TS14	open	29.094
18	Feb	13	TS14	open	29.219
19	Feb	13	TS14	open	29.344
20	Feb	13	TS14	open	29.407
21	Feb	13	TS14	open	29.469
22	Feb	13	TS14	open	29.531
23	Feb	13	TS14	open	29.594
0	Feb	14	TS14	open	29.594
1	Feb	14	TS14	open	29.594
2	Feb	14	TS14	open	29.531
3	Feb	14	TS14	open	29.469
4	Feb	14	TS14	open	29.469
5	Feb	14	TS14	open	29.469
6	Feb	14	TS14	open	29.407
7	Feb	14	TS14	open	29.407
8	Feb	14	TS14	open	29.344
9	Feb	14	TS14	open	29.219
10	Feb	14	TS14	open	29.157
11	Feb	14	TS14	open	29.032
12	Feb	14	TS14	open	28.969
13	Feb	14	TS14	open	28.907
14	Feb	14	TS14	open	28.907
15	Feb	14	TS14	open	28.969
16	Feb	14	TS14	open	29.032
17	Feb	14	TS14	open	29.094
18	Feb	14	TS14	open	29.219
19	Feb	14	TS14	open	29.344
20	Feb	14	TS14	open	29.469
21	Feb	14	TS14	open	29.594
22	Feb	14	TS14	open	29.719
23	Feb	14	TS14	open	29.781
0	Feb	15	TS14	open	29.844
1	Feb	15	TS14	open	29.844
2	Feb	15	TS14	open	29.844
3	Feb	15	TS14	open	29.844
4	Feb	15	TS14	open	29.906
5	Feb	15	TS14	open	29.906
6	Feb	15	TS14	open	29.906
7	Feb	15	TS14	open	29.906
8	Feb	15	TS14	open	29.844
9	Feb	15	TS14	open	29.781
10	Feb	15	TS14	open	29.719
11	Feb	15	TS14	open	29.594
12	Feb	15	TS14	open	29.469
13	Feb	15	TS14	open	29.344
14	Feb	15	TS14	open	29.219
15	Feb	15	TS14	open	29.157
16	Feb	15	TS14	open	29.032
17	Feb	15	TS14	open	29.032
18	Feb	15	TS14	open	28.969
19	Feb	15	TS14	open	28.969
20	Feb	15	TS14	open	28.969
21	Feb	15	TS14	open	29.032
22	Feb	15	TS14	open	29.094
23	Feb	15	TS14	open	29.157
0	Feb	16	TS14	open	29.219
1	Feb	16	TS14	open	29.282
2	Feb	16	TS14	open	29.282
3	Feb	16	TS14	open	29.282
4	Feb	16	TS14	open	29.282
5	Feb	16	TS14	open	29.282
6	Feb	16	TS14	open	29.282
7	Feb	16	TS14	open	29.219
8	Feb	16	TS14	open	29.157
9	Feb	16	TS14	open	29.157
10	Feb	16	TS14	open	29.094
11	Feb	16	TS14	open	29.032
12	Feb	16	TS14	open	28.969
13	Feb	16	TS14	open	28.969
14	Feb	16	TS14	open	28.907
15	Feb	16	TS14	open	28.969
16	Feb	16	TS14	open	29.032
17	Feb	16	TS14	open	29.094
18	Feb	16	TS14	open	29.219
19	Feb	16	TS14	open	29.344
20	Feb	16	TS14	open	29.469
21	Feb	16	TS14	open	29.531
22	Feb	16	TS14	open	29.594
23	Feb	16	TS14	open	29.594
0	Feb	17	TS14	open	29.531
1	Feb	17	TS14	open	29.531
2	Feb	17	TS14	open	29.469
3	Feb	17	TS14	open	29.407
4	Feb	17	TS14	open	29.282
5	Feb	17	TS14	open	29.157
6	Feb	17	TS14	open	29.032
7	Feb	17	TS14	open	28.907
8	Feb	17	TS14	open	28.72
9	Feb	17	TS14	open	28.532
10	Feb	17	TS14	open	28.407
11	Feb	17	TS14	open	28.22
12	Feb	17	TS14	open	28.095
13	Feb	17	TS14	open	28.033
14	Feb	17	TS14	open	27.97
15	Feb	17	TS14	open	27.97
16	Feb	17	TS14	open	28.033
17	Feb	17	TS14	open	28.157
18	Feb	17	TS14	open	28.22
19	Feb	17	TS14	open	28.345
20	Feb	17	TS14	open	28.407
21	Feb	17	TS14	open	28.407
22	Feb	17	TS14	open	28.47
23	Feb	17	TS14	open	28.47
0	Feb	18	TS14	open	28.47
1	Feb	18	TS14	open	28.407
2	Feb	18	TS14	open	28.345
3	Feb	18	TS14	open	28.345
4	Feb	18	TS14	open	28.345
5	Feb	18	TS14	open	28.282
6	Feb	18	TS14	open	28.282
7	Feb	18	TS14	open	28.22
8	Feb	18	TS14	open	28.157
9	Feb	18	TS14	open	28.095
10	Feb	18	TS14	open	28.033
11	Feb	18	TS14	open	27.97
12	Feb	18	TS14	open	27.97
13	Feb	18	TS14	open	27.97
14	Feb	18	TS14	open	28.033
15	Feb	18	TS14	open	28.095
16	Feb	18	TS14	open	28.22
17	Feb	18	TS14	open	28.345
18	Feb	18	TS14	open	28.532
19	Feb	18	TS14	open	28.72
20	Feb	18	TS14	open	28.72
21	Feb	18	TS14	open	28.72
22	Feb	18	TS14	open	28.72
23	Feb	18	TS14	open	28.72
0	Feb	19	TS14	open	28.657
1	Feb	19	TS14	open	28.657
2	Feb	19	TS14	open	28.595
3	Feb	19	TS14	open	28.595
4	Feb	19	TS14	open	28.595
5	Feb	19	TS14	open	28.657
6	Feb	19	TS14	open	28.657
7	Feb	19	TS14	open	28.657
8	Feb	19	TS14	open	28.657
9	Feb	19	TS14	open	28.657
10	Feb	19	TS14	open	28.595
11	Feb	19	TS14	open	28.595
12	Feb	19	TS14	open	28.595
13	Feb	19	TS14	open	28.532
14	Feb	19	TS14	open	28.657
15	Feb	19	TS14	open	28.72
16	Feb	19	TS14	open	28.907
17	Feb	19	TS14	open	29.032
18	Feb	19	TS14	open	29.094
19	Feb	19	TS14	open	29.219
20	Feb	19	TS14	open	29.219
21	Feb	19	TS14	open	29.282
22	Feb	19	TS14	open	29.344
23	Feb	19	TS14	open	29.407
0	Feb	20	TS14	open	29.407
1	Feb	20	TS14	open	29.407
2	Feb	20	TS14	open	29.344
3	Feb	20	TS14	open	29.344
4	Feb	20	TS14	open	29.282
5	Feb	20	TS14	open	29.219
6	Feb	20	TS14	open	29.219
7	Feb	20	TS14	open	29.157
8	Feb	20	TS14	open	29.157
9	Feb	20	TS14	open	29.094
10	Feb	20	TS14	open	29.032
11	Feb	20	TS14	open	28.969
12	Feb	20	TS14	open	28.907
13	Feb	20	TS14	open	28.907
14	Feb	20	TS14	open	28.907
15	Feb	20	TS14	open	28.969
16	Feb	20	TS14	open	29.032
17	Feb	20	TS14	open	29.094
18	Feb	20	TS14	open	29.219
19	Feb	20	TS14	open	29.282
20	Feb	20	TS14	open	29.344
21	Feb	20	TS14	open	29.344
22	Feb	20	TS14	open	29.407
23	Feb	20	TS14	open	29.407
0	Feb	21	TS14	open	29.407
1	Feb	21	TS14	open	29.407
2	Feb	21	TS14	open	29.344
3	Feb	21	TS14	open	29.219
4	Feb	21	TS14	open	29.219
5	Feb	21	TS14	open	29.157
6	Feb	21	TS14	open	29.157
7	Feb	21	TS14	open	29.094
8	Feb	21	TS14	open	28.969
9	Feb	21	TS14	open	28.907
10	Feb	21	TS14	open	28.844
11	Feb	21	TS14	open	28.782
12	Feb	21	TS14	open	28.72
13	Feb	21	TS14	open	28.657
14	Feb	21	TS14	open	28.657
15	Feb	21	TS14	open	28.72
16	Feb	21	TS14	open	28.782
17	Feb	21	TS14	open	28.844
18	Feb	21	TS14	open	28.907
19	Feb	21	TS14	open	29.032
20	Feb	21	TS14	open	29.094
21	Feb	21	TS14	open	29.094
22	Feb	21	TS14	open	29.157
23	Feb	21	TS14	open	29.219
0	Feb	22	TS14	open	29.219
1	Feb	22	TS14	open	29.219
2	Feb	22	TS14	open	29.157
3	Feb	22	TS14	open	29.157
4	Feb	22	TS14	open	29.157
5	Feb	22	TS14	open	29.094
6	Feb	22	TS14	open	29.094
7	Feb	22	TS14	open	29.094
8	Feb	22	TS14	open	29.032
9	Feb	22	TS14	open	28.969
10	Feb	22	TS14	open	28.969
11	Feb	22	TS14	open	28.844
12	Feb	22	TS14	open	28.844
13	Feb	22	TS14	open	28.782
14	Feb	22	TS14	open	28.72
15	Feb	22	TS14	open	28.72
16	Feb	22	TS14	open	28.72
17	Feb	22	TS14	open	28.72
18	Feb	22	TS14	open	28.782
19	Feb	22	TS14	open	28.782
20	Feb	22	TS14	open	28.844
21	Feb	22	TS14	open	28.844
22	Feb	22	TS14	open	28.907
23	Feb	22	TS14	open	28.907
0	Feb	23	TS14	open	28.907
1	Feb	23	TS14	open	28.844
2	Feb	23	TS14	open	28.782
3	Feb	23	TS14	open	28.657
4	Feb	23	TS14	open	28.595
5	Feb	23	TS14	open	28.532
6	Feb	23	TS14	open	28.532
7	Feb	23	TS14	open	28.532
8	Feb	23	TS14	open	28.47
9	Feb	23	TS14	open	28.407
10	Feb	23	TS14	open	28.345
11	Feb	23	TS14	open	28.282
12	Feb	23	TS14	open	28.22
13	Feb	23	TS14	open	28.157
14	Feb	23	TS14	open	28.157
15	Feb	23	TS14	open	28.157
16	Feb	23	TS14	open	28.22
17	Feb	23	TS14	open	28.282
18	Feb	23	TS14	open	28.345
19	Feb	23	TS14	open	28.407
20	Feb	23	TS14	open	28.47
21	Feb	23	TS14	open	28.532
22	Feb	23	TS14	open	28.595
23	Feb	23	TS14	open	28.595
0	Feb	24	TS14	open	28.595
1	Feb	24	TS14	open	28.595
2	Feb	24	TS14	open	28.532
3	Feb	24	TS14	open	28.532
4	Feb	24	TS14	open	28.532
5	Feb	24	TS14	open	28.532
6	Feb	24	TS14	open	28.47
7	Feb	24	TS14	open	28.407
8	Feb	24	TS14	open	28.345
9	Feb	24	TS14	open	28.22
10	Feb	24	TS14	open	28.095
11	Feb	24	TS14	open	28.033
12	Feb	24	TS14	open	27.97
13	Feb	24	TS14	open	27.97
14	Feb	24	TS14	open	27.97
15	Feb	24	TS14	open	27.97
16	Feb	24	TS14	open	27.97
17	Feb	24	TS14	open	28.033
18	Feb	24	TS14	open	28.157
19	Feb	24	TS14	open	28.22
20	Feb	24	TS14	open	28.282
21	Feb	24	TS14	open	28.345
22	Feb	24	TS14	open	28.407
23	Feb	24	TS14	open	28.407
0	Feb	25	TS14	open	28.47
1	Feb	25	TS14	open	28.407
2	Feb	25	TS14	open	28.407
3	Feb	25	TS14	open	28.345
4	Feb	25	TS14	open	28.345
5	Feb	25	TS14	open	28.345
6	Feb	25	TS14	open	28.282
7	Feb	25	TS14	open	28.22
8	Feb	25	TS14	open	28.157
9	Feb	25	TS14	open	28.095
10	Feb	25	TS14	open	28.095
11	Feb	25	TS14	open	28.033
12	Feb	25	TS14	open	27.97
13	Feb	25	TS14	open	27.97
14	Feb	25	TS14	open	27.908
15	Feb	25	TS14	open	27.97
16	Feb	25	TS14	open	28.033
17	Feb	25	TS14	open	28.033
18	Feb	25	TS14	open	28.157
19	Feb	25	TS14	open	28.22
20	Feb	25	TS14	open	28.345
21	Feb	25	TS14	open	28.407
22	Feb	25	TS14	open	28.407
23	Feb	25	TS14	open	28.47
0	Feb	26	TS14	open	28.47
1	Feb	26	TS14	open	28.47
2	Feb	26	TS14	open	28.47
3	Feb	26	TS14	open	28.47
4	Feb	26	TS14	open	28.47
5	Feb	26	TS14	open	28.47
6	Feb	26	TS14	open	28.47
7	Feb	26	TS14	open	28.407
8	Feb	26	TS14	open	28.282
9	Feb	26	TS14	open	28.22
10	Feb	26	TS14	open	28.157
11	Feb	26	TS14	open	28.095
12	Feb	26	TS14	open	28.033
13	Feb	26	TS14	open	27.97
14	Feb	26	TS14	open	27.97
15	Feb	26	TS14	open	28.033
16	Feb	26	TS14	open	28.157
17	Feb	26	TS14	open	28.282
18	Feb	26	TS14	open	28.407
19	Feb	26	TS14	open	28.532
20	Feb	26	TS14	open	28.595
21	Feb	26	TS14	open	28.72
22	Feb	26	TS14	open	28.72
23	Feb	26	TS14	open	28.782
0	Feb	27	TS14	open	28.782
1	Feb	27	TS14	open	28.782
2	Feb	27	TS14	open	28.782
3	Feb	27	TS14	open	28.782
4	Feb	27	TS14	open	28.782
5	Feb	27	TS14	open	28.72
6	Feb	27	TS14	open	28.72
7	Feb	27	TS14	open	28.72
8	Feb	27	TS14	open	28.657
9	Feb	27	TS14	open	28.657
10	Feb	27	TS14	open	28.595
11	Feb	27	TS14	open	28.532
12	Feb	27	TS14	open	28.532
13	Feb	27	TS14	open	28.47
14	Feb	27	TS14	open	28.47
15	Feb	27	TS14	open	28.47
16	Feb	27	TS14	open	28.532
17	Feb	27	TS14	open	28.657
18	Feb	27	TS14	open	28.72
19	Feb	27	TS14	open	28.844
20	Feb	27	TS14	open	29.032
21	Feb	27	TS14	open	29.157
22	Feb	27	TS14	open	29.282
23	Feb	27	TS14	open	29.344
0	Feb	28	TS14	open	29.469
1	Feb	28	TS14	open	29.531
2	Feb	28	TS14	open	29.594
3	Feb	28	TS14	open	29.656
4	Feb	28	TS14	open	29.719
5	Feb	28	TS14	open	29.719
6	Feb	28	TS14	open	29.656
7	Feb	28	TS14	open	29.594
8	Feb	28	TS14	open	29.531
9	Feb	28	TS14	open	29.407
10	Feb	28	TS14	open	29.282
11	Feb	28	TS14	open	29.157
12	Feb	28	TS14	open	29.032
13	Feb	28	TS14	open	28.969
14	Feb	28	TS14	open	28.969
15	Feb	28	TS14	open	28.969
16	Feb	28	TS14	open	28.969
17	Feb	28	TS14	open	29.094
18	Feb	28	TS14	open	29.157
19	Feb	28	TS14	open	29.282
20	Feb	28	TS14	open	29.407
21	Feb	28	TS14	open	29.531
22	Feb	28	TS14	open	29.656
23	Feb	28	TS14	open	29.719
0	Mar	1	TS14	open	29.781
1	Mar	1	TS14	open	29.844
2	Mar	1	TS14	open	29.906
3	Mar	1	TS14	open	29.906
4	Mar	1	TS14	open	29.969
5	Mar	1	TS14	open	29.969
6	Mar	1	TS14	open	29.969
7	Mar	1	TS14	open	29.969
8	Mar	1	TS14	open	29.906
9	Mar	1	TS14	open	29.844
10	Mar	1	TS14	open	29.719
11	Mar	1	TS14	open	29.656
12	Mar	1	TS14	open	29.656
13	Mar	1	TS14	open	29.594
14	Mar	1	TS14	open	29.594
15	Mar	1	TS14	open	29.594
16	Mar	1	TS14	open	29.594
17	Mar	1	TS14	open	29.594
18	Mar	1	TS14	open	29.656
19	Mar	1	TS14	open	29.719
20	Mar	1	TS14	open	29.844
21	Mar	1	TS14	open	29.906
22	Mar	1	TS14	open	30.031
23	Mar	1	TS14	open	30.093
0	Mar	2	TS14	open	30.093
1	Mar	2	TS14	open	30.093
2	Mar	2	TS14	open	30.093
3	Mar	2	TS14	open	30.031
4	Mar	2	TS14	open	29.969
5	Mar	2	TS14	open	29.906
6	Mar	2	TS14	open	29.906
7	Mar	2	TS14	open	29.844
8	Mar	2	TS14	open	29.719
9	Mar	2	TS14	open	29.656
10	Mar	2	TS14	open	29.594
11	Mar	2	TS14	open	29.531
12	Mar	2	TS14	open	29.469
13	Mar	2	TS14	open	29.407
14	Mar	2	TS14	open	29.407
15	Mar	2	TS14	open	29.407
16	Mar	2	TS14	open	29.469
17	Mar	2	TS14	open	29.531
18	Mar	2	TS14	open	29.594
19	Mar	2	TS14	open	29.656
20	Mar	2	TS14	open	29.719
21	Mar	2	TS14	open	29.781
22	Mar	2	TS14	open	29.781
23	Mar	2	TS14	open	29.844
0	Mar	3	TS14	open	29.844
1	Mar	3	TS14	open	29.781
2	Mar	3	TS14	open	29.719
3	Mar	3	TS14	open	29.656
4	Mar	3	TS14	open	29.594
5	Mar	3	TS14	open	29.469
6	Mar	3	TS14	open	29.407
7	Mar	3	TS14	open	29.344
8	Mar	3	TS14	open	29.282
9	Mar	3	TS14	open	29.157
10	Mar	3	TS14	open	29.094
11	Mar	3	TS14	open	28.969
12	Mar	3	TS14	open	28.907
13	Mar	3	TS14	open	28.844
14	Mar	3	TS14	open	28.844
15	Mar	3	TS14	open	28.907
16	Mar	3	TS14	open	28.969
17	Mar	3	TS14	open	29.032
18	Mar	3	TS14	open	29.094
19	Mar	3	TS14	open	29.219
20	Mar	3	TS14	open	29.344
21	Mar	3	TS14	open	29.407
22	Mar	3	TS14	open	29.469
23	Mar	3	TS14	open	29.531
0	Mar	4	TS14	open	29.594
1	Mar	4	TS14	open	29.531
2	Mar	4	TS14	open	29.531
3	Mar	4	TS14	open	29.531
4	Mar	4	TS14	open	29.531
5	Mar	4	TS14	open	29.469
6	Mar	4	TS14	open	29.407
7	Mar	4	TS14	open	29.344
8	Mar	4	TS14	open	29.219
9	Mar	4	TS14	open	29.157
10	Mar	4	TS14	open	29.032
11	Mar	4	TS14	open	28.907
12	Mar	4	TS14	open	28.782
13	Mar	4	TS14	open	28.72
14	Mar	4	TS14	open	28.72
15	Mar	4	TS14	open	28.72
16	Mar	4	TS14	open	28.72
17	Mar	4	TS14	open	28.844
18	Mar	4	TS14	open	28.907
19	Mar	4	TS14	open	29.032
20	Mar	4	TS14	open	29.157
21	Mar	4	TS14	open	29.282
22	Mar	4	TS14	open	29.344
23	Mar	4	TS14	open	29.407
0	Mar	5	TS14	open	29.469
1	Mar	5	TS14	open	29.469
2	Mar	5	TS14	open	29.407
3	Mar	5	TS14	open	29.407
4	Mar	5	TS14	open	29.407
5	Mar	5	TS14	open	29.344
6	Mar	5	TS14	open	29.344
7	Mar	5	TS14	open	29.282
8	Mar	5	TS14	open	29.219
9	Mar	5	TS14	open	29.094
10	Mar	5	TS14	open	29.032
11	Mar	5	TS14	open	28.907
12	Mar	5	TS14	open	28.782
13	Mar	5	TS14	open	28.72
14	Mar	5	TS14	open	28.657
15	Mar	5	TS14	open	28.595
16	Mar	5	TS14	open	28.595
17	Mar	5	TS14	open	28.657
18	Mar	5	TS14	open	28.72
19	Mar	5	TS14	open	28.782
20	Mar	5	TS14	open	28.907
21	Mar	5	TS14	open	28.969
22	Mar	5	TS14	open	28.969
23	Mar	5	TS14	open	28.969
0	Mar	6	TS14	open	28.969
1	Mar	6	TS14	open	28.907
2	Mar	6	TS14	open	28.782
3	Mar	6	TS14	open	28.657
4	Mar	6	TS14	open	28.595
5	Mar	6	TS14	open	28.532
6	Mar	6	TS14	open	28.47
7	Mar	6	TS14	open	28.407
8	Mar	6	TS14	open	28.345
9	Mar	6	TS14	open	28.282
10	Mar	6	TS14	open	28.157
11	Mar	6	TS14	open	28.095
12	Mar	6	TS14	open	28.033
13	Mar	6	TS14	open	27.97
14	Mar	6	TS14	open	27.97
15	Mar	6	TS14	open	27.97
16	Mar	6	TS14	open	28.033
17	Mar	6	TS14	open	28.157
18	Mar	6	TS14	open	28.22
19	Mar	6	TS14	open	28.345
20	Mar	6	TS14	open	28.47
21	Mar	6	TS14	open	28.657
22	Mar	6	TS14	open	28.72
23	Mar	6	TS14	open	28.844
0	Mar	7	TS14	open	28.907
1	Mar	7	TS14	open	28.907
2	Mar	7	TS14	open	28.969
3	Mar	7	TS14	open	28.969
4	Mar	7	TS14	open	28.969
5	Mar	7	TS14	open	28.969
6	Mar	7	TS14	open	28.907
7	Mar	7	TS14	open	28.844
8	Mar	7	TS14	open	28.72
9	Mar	7	TS14	open	28.657
10	Mar	7	TS14	open	28.532
11	Mar	7	TS14	open	28.407
12	Mar	7	TS14	open	28.282
13	Mar	7	TS14	open	28.282
14	Mar	7	TS14	open	28.282
15	Mar	7	TS14	open	28.282
16	Mar	7	TS14	open	28.345
17	Mar	7	TS14	open	28.407
18	Mar	7	TS14	open	28.47
19	Mar	7	TS14	open	28.532
20	Mar	7	TS14	open	28.657
21	Mar	7	TS14	open	28.72
22	Mar	7	TS14	open	28.844
23	Mar	7	TS14	open	28.907
0	Mar	8	TS14	open	28.969
1	Mar	8	TS14	open	29.032
2	Mar	8	TS14	open	29.032
3	Mar	8	TS14	open	29.032
4	Mar	8	TS14	open	29.032
5	Mar	8	TS14	open	29.032
6	Mar	8	TS14	open	28.969
7	Mar	8	TS14	open	28.907
8	Mar	8	TS14	open	28.844
9	Mar	8	TS14	open	28.72
10	Mar	8	TS14	open	28.595
11	Mar	8	TS14	open	28.407
12	Mar	8	TS14	open	28.345
13	Mar	8	TS14	open	28.22
14	Mar	8	TS14	open	28.22
15	Mar	8	TS14	open	28.282
16	Mar	8	TS14	open	28.282
17	Mar	8	TS14	open	28.407
18	Mar	8	TS14	open	28.47
19	Mar	8	TS14	open	28.595
20	Mar	8	TS14	open	28.72
21	Mar	8	TS14	open	28.844
22	Mar	8	TS14	open	28.907
23	Mar	8	TS14	open	29.032
0	Mar	9	TS14	open	29.094
1	Mar	9	TS14	open	29.094
2	Mar	9	TS14	open	29.094
3	Mar	9	TS14	open	29.094
4	Mar	9	TS14	open	29.094
5	Mar	9	TS14	open	29.032
6	Mar	9	TS14	open	28.969
7	Mar	9	TS14	open	28.969
8	Mar	9	TS14	open	28.907
9	Mar	9	TS14	open	28.782
10	Mar	9	TS14	open	28.657
11	Mar	9	TS14	open	28.595
12	Mar	9	TS14	open	28.532
13	Mar	9	TS14	open	28.532
14	Mar	9	TS14	open	28.532
15	Mar	9	TS14	open	28.595
16	Mar	9	TS14	open	28.72
17	Mar	9	TS14	open	28.844
18	Mar	9	TS14	open	28.969
19	Mar	9	TS14	open	29.157
20	Mar	9	TS14	open	29.344
21	Mar	9	TS14	open	29.469
22	Mar	9	TS14	open	29.531
23	Mar	9	TS14	open	29.594
0	Mar	10	TS14	open	29.594
1	Mar	10	TS14	open	29.594
2	Mar	10	TS14	open	29.594
3	Mar	10	TS14	open	29.594
4	Mar	10	TS14	open	29.531
5	Mar	10	TS14	open	29.469
6	Mar	10	TS14	open	29.344
7	Mar	10	TS14	open	29.282
8	Mar	10	TS14	open	29.157
9	Mar	10	TS14	open	29.032
10	Mar	10	TS14	open	28.907
11	Mar	10	TS14	open	28.782
12	Mar	10	TS14	open	28.72
13	Mar	10	TS14	open	28.657
14	Mar	10	TS14	open	28.595
15	Mar	10	TS14	open	28.595
16	Mar	10	TS14	open	28.657
17	Mar	10	TS14	open	28.72
18	Mar	10	TS14	open	28.782
19	Mar	10	TS14	open	28.844
20	Mar	10	TS14	open	28.969
21	Mar	10	TS14	open	29.032
22	Mar	10	TS14	open	29.032
23	Mar	10	TS14	open	29.094
0	Mar	11	TS14	open	29.094
1	Mar	11	TS14	open	29.094
2	Mar	11	TS14	open	29.094
3	Mar	11	TS14	open	29.094
4	Mar	11	TS14	open	29.094
5	Mar	11	TS14	open	29.032
6	Mar	11	TS14	open	28.969
7	Mar	11	TS14	open	28.969
8	Mar	11	TS14	open	28.907
9	Mar	11	TS14	open	28.782
10	Mar	11	TS14	open	28.657
11	Mar	11	TS14	open	28.595
12	Mar	11	TS14	open	28.47
13	Mar	11	TS14	open	28.407
14	Mar	11	TS14	open	28.407
15	Mar	11	TS14	open	28.47
16	Mar	11	TS14	open	28.532
17	Mar	11	TS14	open	28.595
18	Mar	11	TS14	open	28.657
19	Mar	11	TS14	open	28.782
20	Mar	11	TS14	open	28.844
21	Mar	11	TS14	open	28.969
22	Mar	11	TS14	open	29.032
23	Mar	11	TS14	open	29.094
0	Mar	12	TS14	open	29.157
1	Mar	12	TS14	open	29.157
2	Mar	12	TS14	open	29.094
3	Mar	12	TS14	open	29.032
4	Mar	12	TS14	open	28.969
5	Mar	12	TS14	open	28.907
6	Mar	12	TS14	open	28.844
7	Mar	12	TS14	open	28.844
8	Mar	12	TS14	open	28.782
9	Mar	12	TS14	open	28.657
10	Mar	12	TS14	open	28.595
11	Mar	12	TS14	open	28.47
12	Mar	12	TS14	open	28.407
13	Mar	12	TS14	open	28.345
14	Mar	12	TS14	open	28.345
15	Mar	12	TS14	open	28.407
16	Mar	12	TS14	open	28.47
17	Mar	12	TS14	open	28.595
18	Mar	12	TS14	open	28.782
19	Mar	12	TS14	open	28.907
20	Mar	12	TS14	open	29.032
21	Mar	12	TS14	open	29.094
22	Mar	12	TS14	open	29.157
23	Mar	12	TS14	open	29.157
0	Mar	13	TS14	open	29.157
1	Mar	13	TS14	open	29.094
2	Mar	13	TS14	open	29.094
3	Mar	13	TS14	open	29.032
4	Mar	13	TS14	open	29.032
5	Mar	13	TS14	open	28.969
6	Mar	13	TS14	open	28.907
7	Mar	13	TS14	open	28.844
8	Mar	13	TS14	open	28.72
9	Mar	13	TS14	open	28.595
10	Mar	13	TS14	open	28.47
11	Mar	13	TS14	open	28.345
12	Mar	13	TS14	open	28.22
13	Mar	13	TS14	open	28.157
14	Mar	13	TS14	open	28.157
15	Mar	13	TS14	open	28.157
16	Mar	13	TS14	open	28.22
17	Mar	13	TS14	open	28.282
18	Mar	13	TS14	open	28.407
19	Mar	13	TS14	open	28.532
20	Mar	13	TS14	open	28.595
21	Mar	13	TS14	open	28.657
22	Mar	13	TS14	open	28.72
23	Mar	13	TS14	open	28.782
0	Mar	14	TS14	open	28.782
1	Mar	14	TS14	open	28.782
2	Mar	14	TS14	open	28.72
3	Mar	14	TS14	open	28.657
4	Mar	14	TS14	open	28.595
5	Mar	14	TS14	open	28.532
6	Mar	14	TS14	open	28.47
7	Mar	14	TS14	open	28.407
8	Mar	14	TS14	open	28.345
9	Mar	14	TS14	open	28.282
10	Mar	14	TS14	open	28.22
11	Mar	14	TS14	open	28.157
12	Mar	14	TS14	open	28.095
13	Mar	14	TS14	open	28.095
14	Mar	14	TS14	open	28.095
15	Mar	14	TS14	open	28.157
16	Mar	14	TS14	open	28.282
17	Mar	14	TS14	open	28.407
18	Mar	14	TS14	open	28.595
19	Mar	14	TS14	open	28.72
20	Mar	14	TS14	open	28.844
21	Mar	14	TS14	open	28.969
22	Mar	14	TS14	open	29.032
23	Mar	14	TS14	open	29.032
0	Mar	15	TS14	open	29.032
1	Mar	15	TS14	open	28.969
2	Mar	15	TS14	open	28.907
3	Mar	15	TS14	open	28.844
4	Mar	15	TS14	open	28.782
5	Mar	15	TS14	open	28.657
6	Mar	15	TS14	open	28.595
7	Mar	15	TS14	open	28.532
8	Mar	15	TS14	open	28.407
9	Mar	15	TS14	open	28.282
10	Mar	15	TS14	open	28.095
11	Mar	15	TS14	open	27.97
12	Mar	15	TS14	open	27.845
13	Mar	15	TS14	open	27.72
14	Mar	15	TS14	open	27.72
15	Mar	15	TS14	open	27.783
16	Mar	15	TS14	open	27.908
17	Mar	15	TS14	open	28.095
18	Mar	15	TS14	open	28.282
19	Mar	15	TS14	open	28.47
20	Mar	15	TS14	open	28.595
21	Mar	15	TS14	open	28.72
22	Mar	15	TS14	open	28.782
23	Mar	15	TS14	open	28.782
0	Mar	16	TS14	open	28.782
1	Mar	16	TS14	open	28.782
2	Mar	16	TS14	open	28.72
3	Mar	16	TS14	open	28.657
4	Mar	16	TS14	open	28.595
5	Mar	16	TS14	open	28.532
6	Mar	16	TS14	open	28.47
7	Mar	16	TS14	open	28.47
8	Mar	16	TS14	open	28.407
9	Mar	16	TS14	open	28.345
10	Mar	16	TS14	open	28.345
11	Mar	16	TS14	open	28.282
12	Mar	16	TS14	open	28.22
13	Mar	16	TS14	open	28.22
14	Mar	16	TS14	open	28.282
15	Mar	16	TS14	open	28.345
16	Mar	16	TS14	open	28.47
17	Mar	16	TS14	open	28.657
18	Mar	16	TS14	open	28.782
19	Mar	16	TS14	open	28.969
20	Mar	16	TS14	open	29.094
21	Mar	16	TS14	open	29.157
22	Mar	16	TS14	open	29.219
23	Mar	16	TS14	open	29.219
0	Mar	17	TS14	open	29.157
1	Mar	17	TS14	open	29.157
2	Mar	17	TS14	open	29.094
3	Mar	17	TS14	open	29.032
4	Mar	17	TS14	open	28.969
5	Mar	17	TS14	open	28.907
6	Mar	17	TS14	open	28.844
7	Mar	17	TS14	open	28.844
8	Mar	17	TS14	open	28.782
9	Mar	17	TS14	open	28.72
10	Mar	17	TS14	open	28.657
11	Mar	17	TS14	open	28.595
12	Mar	17	TS14	open	28.595
13	Mar	17	TS14	open	28.595
14	Mar	17	TS14	open	28.595
15	Mar	17	TS14	open	28.72
16	Mar	17	TS14	open	28.782
17	Mar	17	TS14	open	28.907
18	Mar	17	TS14	open	29.032
19	Mar	17	TS14	open	29.157
20	Mar	17	TS14	open	29.219
21	Mar	17	TS14	open	29.344
22	Mar	17	TS14	open	29.407
23	Mar	17	TS14	open	29.407
0	Mar	18	TS14	open	29.407
1	Mar	18	TS14	open	29.344
2	Mar	18	TS14	open	29.219
3	Mar	18	TS14	open	29.094
4	Mar	18	TS14	open	28.969
5	Mar	18	TS14	open	28.844
6	Mar	18	TS14	open	28.72
7	Mar	18	TS14	open	28.657
8	Mar	18	TS14	open	28.532
9	Mar	18	TS14	open	28.47
10	Mar	18	TS14	open	28.345
11	Mar	18	TS14	open	28.22
12	Mar	18	TS14	open	28.157
13	Mar	18	TS14	open	28.095
14	Mar	18	TS14	open	28.157
15	Mar	18	TS14	open	28.22
16	Mar	18	TS14	open	28.407
17	Mar	18	TS14	open	28.595
18	Mar	18	TS14	open	28.782
19	Mar	18	TS14	open	28.907
20	Mar	18	TS14	open	29.094
21	Mar	18	TS14	open	29.219
22	Mar	18	TS14	open	29.344
23	Mar	18	TS14	open	29.344
0	Mar	19	TS14	open	29.344
1	Mar	19	TS14	open	29.282
2	Mar	19	TS14	open	29.219
3	Mar	19	TS14	open	29.157
4	Mar	19	TS14	open	29.094
5	Mar	19	TS14	open	29.032
6	Mar	19	TS14	open	28.907
7	Mar	19	TS14	open	28.844
8	Mar	19	TS14	open	28.72
9	Mar	19	TS14	open	28.657
10	Mar	19	TS14	open	28.532
11	Mar	19	TS14	open	28.407
12	Mar	19	TS14	open	28.345
13	Mar	19	TS14	open	28.282
14	Mar	19	TS14	open	28.282
15	Mar	19	TS14	open	28.345
16	Mar	19	TS14	open	28.47
17	Mar	19	TS14	open	28.595
18	Mar	19	TS14	open	28.72
19	Mar	19	TS14	open	28.907
20	Mar	19	TS14	open	29.032
21	Mar	19	TS14	open	29.094
22	Mar	19	TS14	open	29.157
23	Mar	19	TS14	open	29.219
0	Mar	20	TS14	open	29.282
1	Mar	20	TS14	open	29.282
2	Mar	20	TS14	open	29.282
3	Mar	20	TS14	open	29.282
4	Mar	20	TS14	open	29.219
5	Mar	20	TS14	open	29.219
6	Mar	20	TS14	open	29.094
7	Mar	20	TS14	open	29.032
8	Mar	20	TS14	open	28.969
9	Mar	20	TS14	open	28.844
10	Mar	20	TS14	open	28.782
11	Mar	20	TS14	open	28.72
12	Mar	20	TS14	open	28.657
13	Mar	20	TS14	open	28.657
14	Mar	20	TS14	open	28.72
15	Mar	20	TS14	open	28.782
16	Mar	20	TS14	open	28.907
17	Mar	20	TS14	open	29.032
18	Mar	20	TS14	open	29.219
19	Mar	20	TS14	open	29.407
20	Mar	20	TS14	open	29.531
21	Mar	20	TS14	open	29.656
22	Mar	20	TS14	open	29.656
23	Mar	20	TS14	open	29.656
0	Mar	21	TS14	open	29.594
1	Mar	21	TS14	open	29.531
2	Mar	21	TS14	open	29.469
3	Mar	21	TS14	open	29.407
4	Mar	21	TS14	open	29.407
5	Mar	21	TS14	open	29.282
6	Mar	21	TS14	open	29.219
7	Mar	21	TS14	open	29.157
8	Mar	21	TS14	open	29.094
9	Mar	21	TS14	open	29.032
10	Mar	21	TS14	open	28.969
11	Mar	21	TS14	open	28.907
12	Mar	21	TS14	open	28.844
13	Mar	21	TS14	open	28.782
14	Mar	21	TS14	open	28.782
15	Mar	21	TS14	open	28.844
16	Mar	21	TS14	open	28.844
17	Mar	21	TS14	open	28.969
18	Mar	21	TS14	open	29.032
19	Mar	21	TS14	open	29.094
20	Mar	21	TS14	open	29.157
21	Mar	21	TS14	open	29.157
22	Mar	21	TS14	open	29.157
23	Mar	21	TS14	open	29.157
0	Mar	22	TS14	open	29.094
1	Mar	22	TS14	open	29.094
2	Mar	22	TS14	open	29.094
3	Mar	22	TS14	open	29.032
4	Mar	22	TS14	open	29.032
5	Mar	22	TS14	open	28.969
6	Mar	22	TS14	open	28.907
7	Mar	22	TS14	open	28.844
8	Mar	22	TS14	open	28.782
9	Mar	22	TS14	open	28.782
10	Mar	22	TS14	open	28.72
11	Mar	22	TS14	open	28.657
12	Mar	22	TS14	open	28.595
13	Mar	22	TS14	open	28.595
14	Mar	22	TS14	open	28.595
15	Mar	22	TS14	open	28.657
16	Mar	22	TS14	open	28.72
17	Mar	22	TS14	open	28.844
18	Mar	22	TS14	open	29.032
19	Mar	22	TS14	open	29.219
20	Mar	22	TS14	open	29.282
21	Mar	22	TS14	open	29.282
22	Mar	22	TS14	open	29.282
23	Mar	22	TS14	open	29.219
0	Mar	23	TS14	open	29.157
1	Mar	23	TS14	open	29.094
2	Mar	23	TS14	open	29.032
3	Mar	23	TS14	open	28.969
4	Mar	23	TS14	open	28.907
5	Mar	23	TS14	open	28.844
6	Mar	23	TS14	open	28.72
7	Mar	23	TS14	open	28.595
8	Mar	23	TS14	open	28.47
9	Mar	23	TS14	open	28.407
10	Mar	23	TS14	open	28.282
11	Mar	23	TS14	open	28.157
12	Mar	23	TS14	open	28.095
13	Mar	23	TS14	open	28.033
14	Mar	23	TS14	open	28.033
15	Mar	23	TS14	open	28.033
16	Mar	23	TS14	open	28.033
17	Mar	23	TS14	open	28.095
18	Mar	23	TS14	open	28.157
19	Mar	23	TS14	open	28.22
20	Mar	23	TS14	open	28.22
21	Mar	23	TS14	open	28.22
22	Mar	23	TS14	open	28.22
23	Mar	23	TS14	open	28.157
0	Mar	24	TS14	open	28.095
1	Mar	24	TS14	open	28.095
2	Mar	24	TS14	open	28.033
3	Mar	24	TS14	open	27.97
4	Mar	24	TS14	open	27.908
5	Mar	24	TS14	open	27.908
6	Mar	24	TS14	open	27.908
7	Mar	24	TS14	open	27.845
8	Mar	24	TS14	open	27.845
9	Mar	24	TS14	open	27.783
10	Mar	24	TS14	open	27.783
11	Mar	24	TS14	open	27.783
12	Mar	24	TS14	open	27.783
13	Mar	24	TS14	open	27.783
14	Mar	24	TS14	open	27.783
15	Mar	24	TS14	open	27.783
16	Mar	24	TS14	open	27.845
17	Mar	24	TS14	open	27.845
18	Mar	24	TS14	open	27.908
19	Mar	24	TS14	open	27.97
20	Mar	24	TS14	open	28.033
21	Mar	24	TS14	open	28.095
22	Mar	24	TS14	open	28.157
23	Mar	24	TS14	open	28.157
0	Mar	25	TS14	open	28.095
1	Mar	25	TS14	open	28.095
2	Mar	25	TS14	open	28.033
3	Mar	25	TS14	open	28.033
4	Mar	25	TS14	open	28.033
5	Mar	25	TS14	open	28.033
6	Mar	25	TS14	open	27.97
7	Mar	25	TS14	open	27.97
8	Mar	25	TS14	open	27.908
9	Mar	25	TS14	open	27.908
10	Mar	25	TS14	open	27.845
11	Mar	25	TS14	open	27.845
12	Mar	25	TS14	open	27.845
13	Mar	25	TS14	open	27.783
14	Mar	25	TS14	open	27.845
15	Mar	25	TS14	open	27.845
16	Mar	25	TS14	open	27.908
17	Mar	25	TS14	open	28.033
18	Mar	25	TS14	open	28.157
19	Mar	25	TS14	open	28.282
20	Mar	25	TS14	open	28.407
21	Mar	25	TS14	open	28.47
22	Mar	25	TS14	open	28.47
23	Mar	25	TS14	open	28.407
0	Mar	26	TS14	open	28.345
1	Mar	26	TS14	open	28.22
2	Mar	26	TS14	open	28.157
3	Mar	26	TS14	open	28.033
4	Mar	26	TS14	open	27.97
5	Mar	26	TS14	open	27.97
6	Mar	26	TS14	open	27.908
7	Mar	26	TS14	open	27.845
8	Mar	26	TS14	open	27.845
9	Mar	26	TS14	open	27.783
10	Mar	26	TS14	open	27.658
11	Mar	26	TS14	open	27.595
12	Mar	26	TS14	open	27.533
13	Mar	26	TS14	open	27.47
14	Mar	26	TS14	open	27.47
15	Mar	26	TS14	open	27.47
16	Mar	26	TS14	open	27.533
17	Mar	26	TS14	open	27.595
18	Mar	26	TS14	open	27.595
19	Mar	26	TS14	open	27.533
20	Mar	26	TS14	open	27.47
21	Mar	26	TS14	open	27.345
22	Mar	26	TS14	open	27.283
23	Mar	26	TS14	open	27.22
0	Mar	27	TS14	open	27.095
1	Mar	27	TS14	open	26.971
2	Mar	27	TS14	open	26.846
3	Mar	27	TS14	open	26.721
4	Mar	27	TS14	open	26.596
5	Mar	27	TS14	open	26.471
6	Mar	27	TS14	open	26.346
7	Mar	27	TS14	open	26.221
8	Mar	27	TS14	open	25.908
9	Mar	27	TS14	open	25.721
10	Mar	27	TS14	open	25.533
11	Mar	27	TS14	open	25.408
12	Mar	27	TS14	open	25.283
13	Mar	27	TS14	open	25.221
14	Mar	27	TS14	open	25.221
15	Mar	27	TS14	open	25.283
16	Mar	27	TS14	open	25.346
17	Mar	27	TS14	open	25.408
18	Mar	27	TS14	open	25.471
19	Mar	27	TS14	open	25.533
20	Mar	27	TS14	open	25.596
21	Mar	27	TS14	open	25.596
22	Mar	27	TS14	open	25.658
23	Mar	27	TS14	open	25.658
0	Mar	28	TS14	open	25.658
1	Mar	28	TS14	open	25.658
2	Mar	28	TS14	open	25.721
3	Mar	28	TS14	open	25.721
4	Mar	28	TS14	open	25.721
5	Mar	28	TS14	open	25.783
6	Mar	28	TS14	open	25.783
7	Mar	28	TS14	open	25.783
8	Mar	28	TS14	open	25.721
9	Mar	28	TS14	open	25.721
10	Mar	28	TS14	open	25.658
11	Mar	28	TS14	open	25.533
12	Mar	28	TS14	open	25.471
13	Mar	28	TS14	open	25.408
14	Mar	28	TS14	open	25.408
15	Mar	28	TS14	open	25.408
16	Mar	28	TS14	open	25.471
17	Mar	28	TS14	open	25.658
18	Mar	28	TS14	open	25.721
19	Mar	28	TS14	open	25.721
20	Mar	28	TS14	open	25.783
21	Mar	28	TS14	open	25.783
22	Mar	28	TS14	open	25.846
23	Mar	28	TS14	open	25.846
0	Mar	29	TS14	open	25.908
1	Mar	29	TS14	open	25.908
2	Mar	29	TS14	open	25.971
3	Mar	29	TS14	open	25.971
4	Mar	29	TS14	open	25.971
5	Mar	29	TS14	open	25.971
6	Mar	29	TS14	open	26.033
7	Mar	29	TS14	open	25.971
8	Mar	29	TS14	open	25.908
9	Mar	29	TS14	open	25.846
10	Mar	29	TS14	open	25.721
11	Mar	29	TS14	open	25.658
12	Mar	29	TS14	open	25.596
13	Mar	29	TS14	open	25.658
14	Mar	29	TS14	open	25.783
15	Mar	29	TS14	open	25.846
16	Mar	29	TS14	open	26.033
17	Mar	29	TS14	open	26.096
18	Mar	29	TS14	open	26.096
19	Mar	29	TS14	open	26.158
20	Mar	29	TS14	open	26.221
21	Mar	29	TS14	open	26.221
22	Mar	29	TS14	open	26.221
23	Mar	29	TS14	open	26.221
0	Mar	30	TS14	open	26.158
1	Mar	30	TS14	open	26.158
2	Mar	30	TS14	open	26.158
3	Mar	30	TS14	open	26.096
4	Mar	30	TS14	open	26.096
5	Mar	30	TS14	open	26.033
6	Mar	30	TS14	open	26.033
7	Mar	30	TS14	open	26.033
8	Mar	30	TS14	open	26.033
9	Mar	30	TS14	open	25.971
10	Mar	30	TS14	open	25.908
11	Mar	30	TS14	open	25.908
12	Mar	30	TS14	open	25.846
13	Mar	30	TS14	open	25.846
14	Mar	30	TS14	open	25.846
15	Mar	30	TS14	open	25.908
16	Mar	30	TS14	open	25.971
17	Mar	30	TS14	open	26.033
18	Mar	30	TS14	open	26.096
19	Mar	30	TS14	open	26.096
20	Mar	30	TS14	open	26.096
21	Mar	30	TS14	open	26.158
22	Mar	30	TS14	open	26.221
23	Mar	30	TS14	open	26.221
0	Mar	31	TS14	open	26.221
1	Mar	31	TS14	open	26.283
2	Mar	31	TS14	open	26.283
3	Mar	31	TS14	open	26.283
4	Mar	31	TS14	open	26.283
5	Mar	31	TS14	open	26.221
6	Mar	31	TS14	open	26.221
7	Mar	31	TS14	open	26.158
8	Mar	31	TS14	open	26.096
9	Mar	31	TS14	open	26.096
10	Mar	31	TS14	open	26.096
11	Mar	31	TS14	open	26.033
12	Mar	31	TS14	open	26.033
13	Mar	31	TS14	open	25.971
14	Mar	31	TS14	open	25.971
15	Mar	31	TS14	open	25.971
16	Mar	31	TS14	open	25.971
17	Mar	31	TS14	open	26.033
18	Mar	31	TS14	open	26.096
19	Mar	31	TS14	open	26.158
20	Mar	31	TS14	open	26.221
21	Mar	31	TS14	open	26.283
22	Mar	31	TS14	open	26.408
23	Mar	31	TS14	open	26.471
0	Feb	1	TS18	closed	29.448
1	Feb	1	TS18	closed	29.573
2	Feb	1	TS18	closed	29.511
3	Feb	1	TS18	closed	29.448
4	Feb	1	TS18	closed	29.073
5	Feb	1	TS18	closed	28.948
6	Feb	1	TS18	closed	28.886
7	Feb	1	TS18	closed	28.823
8	Feb	1	TS18	closed	29.073
9	Feb	1	TS18	closed	29.323
10	Feb	1	TS18	closed	29.573
11	Feb	1	TS18	closed	29.948
12	Feb	1	TS18	closed	29.76
13	Feb	1	TS18	closed	29.885
14	Feb	1	TS18	closed	30.073
15	Feb	1	TS18	closed	30.198
16	Feb	1	TS18	closed	30.322
17	Feb	1	TS18	closed	30.51
18	Feb	1	TS18	closed	30.51
19	Feb	1	TS18	closed	30.198
20	Feb	1	TS18	closed	30.198
21	Feb	1	TS18	closed	29.76
22	Feb	1	TS18	closed	29.573
23	Feb	1	TS18	closed	29.635
0	Feb	2	TS18	closed	29.948
1	Feb	2	TS18	closed	29.885
2	Feb	2	TS18	closed	29.885
3	Feb	2	TS18	closed	30.073
4	Feb	2	TS18	closed	30.01
5	Feb	2	TS18	closed	29.948
6	Feb	2	TS18	closed	30.01
7	Feb	2	TS18	closed	29.885
8	Feb	2	TS18	closed	29.323
9	Feb	2	TS18	closed	29.76
10	Feb	2	TS18	closed	30.322
11	Feb	2	TS18	closed	30.135
12	Feb	2	TS18	closed	30.198
13	Feb	2	TS18	closed	30.322
14	Feb	2	TS18	closed	30.51
15	Feb	2	TS18	closed	30.697
16	Feb	2	TS18	closed	30.822
17	Feb	2	TS18	closed	30.76
18	Feb	2	TS18	closed	30.135
19	Feb	2	TS18	closed	29.511
20	Feb	2	TS18	closed	29.76
21	Feb	2	TS18	closed	29.698
22	Feb	2	TS18	closed	29.448
23	Feb	2	TS18	closed	29.635
0	Feb	3	TS18	closed	29.511
1	Feb	3	TS18	closed	29.698
2	Feb	3	TS18	closed	29.635
3	Feb	3	TS18	closed	29.261
4	Feb	3	TS18	closed	29.011
5	Feb	3	TS18	closed	29.073
6	Feb	3	TS18	closed	29.136
7	Feb	3	TS18	closed	29.198
8	Feb	3	TS18	closed	29.198
9	Feb	3	TS18	closed	29.261
10	Feb	3	TS18	closed	29.511
11	Feb	3	TS18	closed	29.573
12	Feb	3	TS18	closed	29.948
13	Feb	3	TS18	closed	30.01
14	Feb	3	TS18	closed	30.198
15	Feb	3	TS18	closed	30.385
16	Feb	3	TS18	closed	30.447
17	Feb	3	TS18	closed	30.635
18	Feb	3	TS18	closed	30.385
19	Feb	3	TS18	closed	30.01
20	Feb	3	TS18	closed	30.01
21	Feb	3	TS18	closed	29.635
22	Feb	3	TS18	closed	29.448
23	Feb	3	TS18	closed	29.573
0	Feb	4	TS18	closed	29.448
1	Feb	4	TS18	closed	29.511
2	Feb	4	TS18	closed	29.511
3	Feb	4	TS18	closed	29.261
4	Feb	4	TS18	closed	29.073
5	Feb	4	TS18	closed	28.948
6	Feb	4	TS18	closed	29.073
7	Feb	4	TS18	closed	28.886
8	Feb	4	TS18	closed	29.011
9	Feb	4	TS18	closed	29.261
10	Feb	4	TS18	closed	29.448
11	Feb	4	TS18	closed	29.448
12	Feb	4	TS18	closed	29.511
13	Feb	4	TS18	closed	29.823
14	Feb	4	TS18	closed	29.948
15	Feb	4	TS18	closed	30.135
16	Feb	4	TS18	closed	30.26
17	Feb	4	TS18	closed	30.322
18	Feb	4	TS18	closed	30.135
19	Feb	4	TS18	closed	29.573
20	Feb	4	TS18	closed	29.573
21	Feb	4	TS18	closed	29.698
22	Feb	4	TS18	closed	29.698
23	Feb	4	TS18	closed	29.76
0	Feb	5	TS18	closed	29.76
1	Feb	5	TS18	closed	29.573
2	Feb	5	TS18	closed	29.573
3	Feb	5	TS18	closed	29.448
4	Feb	5	TS18	closed	29.386
5	Feb	5	TS18	closed	29.073
6	Feb	5	TS18	closed	29.011
7	Feb	5	TS18	closed	28.761
8	Feb	5	TS18	closed	29.011
9	Feb	5	TS18	closed	28.823
10	Feb	5	TS18	closed	29.261
11	Feb	5	TS18	closed	29.448
12	Feb	5	TS18	closed	29.635
13	Feb	5	TS18	closed	29.76
14	Feb	5	TS18	closed	29.885
15	Feb	5	TS18	closed	30.135
16	Feb	5	TS18	closed	30.322
17	Feb	5	TS18	closed	30.447
18	Feb	5	TS18	closed	30.51
19	Feb	5	TS18	closed	30.198
20	Feb	5	TS18	closed	29.885
21	Feb	5	TS18	closed	29.948
22	Feb	5	TS18	closed	30.073
23	Feb	5	TS18	closed	30.135
0	Feb	6	TS18	closed	30.073
1	Feb	6	TS18	closed	30.073
2	Feb	6	TS18	closed	29.823
3	Feb	6	TS18	closed	29.635
4	Feb	6	TS18	closed	29.386
5	Feb	6	TS18	closed	29.136
6	Feb	6	TS18	closed	29.198
7	Feb	6	TS18	closed	29.073
8	Feb	6	TS18	closed	29.198
9	Feb	6	TS18	closed	29.386
10	Feb	6	TS18	closed	29.635
11	Feb	6	TS18	closed	29.885
12	Feb	6	TS18	closed	30.01
13	Feb	6	TS18	closed	30.198
14	Feb	6	TS18	closed	30.322
15	Feb	6	TS18	closed	30.51
16	Feb	6	TS18	closed	30.51
17	Feb	6	TS18	closed	30.635
18	Feb	6	TS18	closed	30.697
19	Feb	6	TS18	closed	30.447
20	Feb	6	TS18	closed	30.135
21	Feb	6	TS18	closed	29.698
22	Feb	6	TS18	closed	29.011
23	Feb	6	TS18	closed	29.011
0	Feb	7	TS18	closed	29.198
1	Feb	7	TS18	closed	28.573
2	Feb	7	TS18	closed	28.823
3	Feb	7	TS18	closed	28.698
4	Feb	7	TS18	closed	28.761
5	Feb	7	TS18	closed	28.698
6	Feb	7	TS18	closed	28.823
7	Feb	7	TS18	closed	28.823
8	Feb	7	TS18	closed	28.886
9	Feb	7	TS18	closed	29.011
10	Feb	7	TS18	closed	29.136
11	Feb	7	TS18	closed	29.323
12	Feb	7	TS18	closed	29.698
13	Feb	7	TS18	closed	29.885
14	Feb	7	TS18	closed	29.885
15	Feb	7	TS18	closed	30.26
16	Feb	7	TS18	closed	30.385
17	Feb	7	TS18	closed	30.385
18	Feb	7	TS18	closed	30.447
19	Feb	7	TS18	closed	30.26
20	Feb	7	TS18	closed	30.135
21	Feb	7	TS18	closed	30.198
22	Feb	7	TS18	closed	30.198
23	Feb	7	TS18	closed	30.26
0	Feb	8	TS18	closed	30.198
1	Feb	8	TS18	closed	30.01
2	Feb	8	TS18	closed	29.948
3	Feb	8	TS18	closed	29.448
4	Feb	8	TS18	closed	29.323
5	Feb	8	TS18	closed	29.386
6	Feb	8	TS18	closed	29.323
7	Feb	8	TS18	closed	29.448
8	Feb	8	TS18	closed	29.386
9	Feb	8	TS18	closed	29.511
10	Feb	8	TS18	closed	29.698
11	Feb	8	TS18	closed	29.76
12	Feb	8	TS18	closed	30.01
13	Feb	8	TS18	closed	30.135
14	Feb	8	TS18	closed	30.26
15	Feb	8	TS18	closed	30.26
16	Feb	8	TS18	closed	30.322
17	Feb	8	TS18	closed	30.01
18	Feb	8	TS18	closed	29.823
19	Feb	8	TS18	closed	29.261
20	Feb	8	TS18	closed	28.636
21	Feb	8	TS18	closed	28.136
22	Feb	8	TS18	closed	28.3
23	Feb	8	TS18	closed	28.511
0	Feb	9	TS18	closed	28.573
1	Feb	9	TS18	closed	28.511
2	Feb	9	TS18	closed	28.386
3	Feb	9	TS18	closed	28.3
4	Feb	9	TS18	closed	28.199
5	Feb	9	TS18	closed	28.3
6	Feb	9	TS18	closed	28.199
7	Feb	9	TS18	closed	28.3
8	Feb	9	TS18	closed	28.386
9	Feb	9	TS18	closed	28.449
10	Feb	9	TS18	closed	28.698
11	Feb	9	TS18	closed	29.011
12	Feb	9	TS18	closed	29.323
13	Feb	9	TS18	closed	29.635
14	Feb	9	TS18	closed	29.76
15	Feb	9	TS18	closed	29.698
16	Feb	9	TS18	closed	29.948
17	Feb	9	TS18	closed	29.823
18	Feb	9	TS18	closed	29.635
19	Feb	9	TS18	closed	29.261
20	Feb	9	TS18	closed	29.011
21	Feb	9	TS18	closed	29.198
22	Feb	9	TS18	closed	28.698
23	Feb	9	TS18	closed	28.761
0	Feb	10	TS18	closed	28.886
1	Feb	10	TS18	closed	28.886
2	Feb	10	TS18	closed	28.511
3	Feb	10	TS18	closed	28.573
4	Feb	10	TS18	closed	28.636
5	Feb	10	TS18	closed	28.698
6	Feb	10	TS18	closed	28.698
7	Feb	10	TS18	closed	28.636
8	Feb	10	TS18	closed	28.698
9	Feb	10	TS18	closed	28.761
10	Feb	10	TS18	closed	29.011
11	Feb	10	TS18	closed	29.136
12	Feb	10	TS18	closed	29.386
13	Feb	10	TS18	closed	29.635
14	Feb	10	TS18	closed	29.76
15	Feb	10	TS18	closed	29.823
16	Feb	10	TS18	closed	30.01
17	Feb	10	TS18	closed	30.135
18	Feb	10	TS18	closed	30.01
19	Feb	10	TS18	closed	29.573
20	Feb	10	TS18	closed	29.573
21	Feb	10	TS18	closed	29.76
22	Feb	10	TS18	closed	29.198
23	Feb	10	TS18	closed	28.823
0	Feb	11	TS18	closed	28.823
1	Feb	11	TS18	closed	29.073
2	Feb	11	TS18	closed	29.073
3	Feb	11	TS18	closed	29.073
4	Feb	11	TS18	closed	29.073
5	Feb	11	TS18	closed	29.073
6	Feb	11	TS18	closed	29.198
7	Feb	11	TS18	closed	29.073
8	Feb	11	TS18	closed	29.011
9	Feb	11	TS18	closed	29.011
10	Feb	11	TS18	closed	29.323
11	Feb	11	TS18	closed	29.698
12	Feb	11	TS18	closed	29.948
13	Feb	11	TS18	closed	30.198
14	Feb	11	TS18	closed	30.385
15	Feb	11	TS18	closed	30.572
16	Feb	11	TS18	closed	30.635
17	Feb	11	TS18	closed	30.76
18	Feb	11	TS18	closed	30.947
19	Feb	11	TS18	closed	30.947
20	Feb	11	TS18	closed	30.697
21	Feb	11	TS18	closed	30.572
22	Feb	11	TS18	closed	30.51
23	Feb	11	TS18	closed	30.135
0	Feb	12	TS18	closed	29.823
1	Feb	12	TS18	closed	29.948
2	Feb	12	TS18	closed	30.01
3	Feb	12	TS18	closed	30.073
4	Feb	12	TS18	closed	29.948
5	Feb	12	TS18	closed	29.885
6	Feb	12	TS18	closed	29.76
7	Feb	12	TS18	closed	29.885
8	Feb	12	TS18	closed	29.823
9	Feb	12	TS18	closed	29.698
10	Feb	12	TS18	closed	30.073
11	Feb	12	TS18	closed	30.26
12	Feb	12	TS18	closed	30.635
13	Feb	12	TS18	closed	30.76
14	Feb	12	TS18	closed	31.134
15	Feb	12	TS18	closed	31.072
16	Feb	12	TS18	closed	31.259
17	Feb	12	TS18	closed	31.509
18	Feb	12	TS18	closed	31.197
19	Feb	12	TS18	closed	30.76
20	Feb	12	TS18	closed	30.322
21	Feb	12	TS18	closed	30.01
22	Feb	12	TS18	closed	29.698
23	Feb	12	TS18	closed	28.886
0	Feb	13	TS18	closed	29.261
1	Feb	13	TS18	closed	29.136
2	Feb	13	TS18	closed	29.386
3	Feb	13	TS18	closed	29.511
4	Feb	13	TS18	closed	29.635
5	Feb	13	TS18	closed	29.698
6	Feb	13	TS18	closed	29.76
7	Feb	13	TS18	closed	29.885
8	Feb	13	TS18	closed	29.948
9	Feb	13	TS18	closed	30.073
10	Feb	13	TS18	closed	30.322
11	Feb	13	TS18	closed	30.572
12	Feb	13	TS18	closed	30.697
13	Feb	13	TS18	closed	30.76
14	Feb	13	TS18	closed	30.885
15	Feb	13	TS18	closed	31.072
16	Feb	13	TS18	closed	31.259
17	Feb	13	TS18	closed	31.384
18	Feb	13	TS18	closed	31.384
19	Feb	13	TS18	closed	30.885
20	Feb	13	TS18	closed	30.51
21	Feb	13	TS18	closed	30.322
22	Feb	13	TS18	closed	30.01
23	Feb	13	TS18	closed	29.635
0	Feb	14	TS18	closed	29.198
1	Feb	14	TS18	closed	29.011
2	Feb	14	TS18	closed	29.261
3	Feb	14	TS18	closed	29.323
4	Feb	14	TS18	closed	29.448
5	Feb	14	TS18	closed	29.448
6	Feb	14	TS18	closed	29.448
7	Feb	14	TS18	closed	29.448
8	Feb	14	TS18	closed	29.511
9	Feb	14	TS18	closed	29.573
10	Feb	14	TS18	closed	29.948
11	Feb	14	TS18	closed	30.385
12	Feb	14	TS18	closed	30.572
13	Feb	14	TS18	closed	30.447
14	Feb	14	TS18	closed	30.697
15	Feb	14	TS18	closed	30.885
16	Feb	14	TS18	closed	30.885
17	Feb	14	TS18	closed	30.51
18	Feb	14	TS18	closed	30.322
19	Feb	14	TS18	closed	29.948
20	Feb	14	TS18	closed	29.573
21	Feb	14	TS18	closed	29.073
22	Feb	14	TS18	closed	28.698
23	Feb	14	TS18	closed	28.636
0	Feb	15	TS18	closed	28.761
1	Feb	15	TS18	closed	28.948
2	Feb	15	TS18	closed	29.386
3	Feb	15	TS18	closed	29.635
4	Feb	15	TS18	closed	29.635
5	Feb	15	TS18	closed	29.76
6	Feb	15	TS18	closed	29.823
7	Feb	15	TS18	closed	30.01
8	Feb	15	TS18	closed	30.073
9	Feb	15	TS18	closed	30.135
10	Feb	15	TS18	closed	30.198
11	Feb	15	TS18	closed	30.198
12	Feb	15	TS18	closed	30.385
13	Feb	15	TS18	closed	30.635
14	Feb	15	TS18	closed	30.76
15	Feb	15	TS18	closed	30.822
16	Feb	15	TS18	closed	30.697
17	Feb	15	TS18	closed	30.885
18	Feb	15	TS18	closed	30.822
19	Feb	15	TS18	closed	30.822
20	Feb	15	TS18	closed	30.885
21	Feb	15	TS18	closed	31.009
22	Feb	15	TS18	closed	31.072
23	Feb	15	TS18	closed	31.197
0	Feb	16	TS18	closed	31.072
1	Feb	16	TS18	closed	31.197
2	Feb	16	TS18	closed	31.197
3	Feb	16	TS18	closed	31.322
4	Feb	16	TS18	closed	31.197
5	Feb	16	TS18	closed	31.259
6	Feb	16	TS18	closed	31.134
7	Feb	16	TS18	closed	31.259
8	Feb	16	TS18	closed	31.259
9	Feb	16	TS18	closed	31.322
10	Feb	16	TS18	closed	31.197
11	Feb	16	TS18	closed	31.134
12	Feb	16	TS18	closed	31.259
13	Feb	16	TS18	closed	31.384
14	Feb	16	TS18	closed	31.384
15	Feb	16	TS18	closed	31.447
16	Feb	16	TS18	closed	31.509
17	Feb	16	TS18	closed	31.259
18	Feb	16	TS18	closed	30.885
19	Feb	16	TS18	closed	31.134
20	Feb	16	TS18	closed	31.572
21	Feb	16	TS18	closed	31.696
22	Feb	16	TS18	closed	31.759
23	Feb	16	TS18	closed	31.509
0	Feb	17	TS18	closed	31.447
1	Feb	17	TS18	closed	31.447
2	Feb	17	TS18	closed	31.322
3	Feb	17	TS18	closed	31.322
4	Feb	17	TS18	closed	31.197
5	Feb	17	TS18	closed	30.947
6	Feb	17	TS18	closed	30.822
7	Feb	17	TS18	closed	30.697
8	Feb	17	TS18	closed	30.635
9	Feb	17	TS18	closed	30.447
10	Feb	17	TS18	closed	30.322
11	Feb	17	TS18	closed	30.01
12	Feb	17	TS18	closed	29.948
13	Feb	17	TS18	closed	30.073
14	Feb	17	TS18	closed	30.26
15	Feb	17	TS18	closed	30.51
16	Feb	17	TS18	closed	30.635
17	Feb	17	TS18	closed	30.76
18	Feb	17	TS18	closed	30.947
19	Feb	17	TS18	closed	31.009
20	Feb	17	TS18	closed	31.072
21	Feb	17	TS18	closed	31.134
22	Feb	17	TS18	closed	31.197
23	Feb	17	TS18	closed	31.072
0	Feb	18	TS18	closed	31.009
1	Feb	18	TS18	closed	31.072
2	Feb	18	TS18	closed	31.009
3	Feb	18	TS18	closed	30.822
4	Feb	18	TS18	closed	30.697
5	Feb	18	TS18	closed	30.572
6	Feb	18	TS18	closed	30.447
7	Feb	18	TS18	closed	30.385
8	Feb	18	TS18	closed	30.26
9	Feb	18	TS18	closed	30.198
10	Feb	18	TS18	closed	30.135
11	Feb	18	TS18	closed	30.01
12	Feb	18	TS18	closed	29.885
13	Feb	18	TS18	closed	30.073
14	Feb	18	TS18	closed	30.26
15	Feb	18	TS18	closed	30.447
16	Feb	18	TS18	closed	30.635
17	Feb	18	TS18	closed	30.76
18	Feb	18	TS18	closed	30.76
19	Feb	18	TS18	closed	30.885
20	Feb	18	TS18	closed	30.947
21	Feb	18	TS18	closed	31.072
22	Feb	18	TS18	closed	31.134
23	Feb	18	TS18	closed	31.197
0	Feb	19	TS18	closed	31.197
1	Feb	19	TS18	closed	31.072
2	Feb	19	TS18	closed	31.009
3	Feb	19	TS18	closed	30.885
4	Feb	19	TS18	closed	30.885
5	Feb	19	TS18	closed	30.822
6	Feb	19	TS18	closed	30.76
7	Feb	19	TS18	closed	30.697
8	Feb	19	TS18	closed	30.572
9	Feb	19	TS18	closed	30.51
10	Feb	19	TS18	closed	30.51
11	Feb	19	TS18	closed	30.322
12	Feb	19	TS18	closed	30.447
13	Feb	19	TS18	closed	30.635
14	Feb	19	TS18	closed	30.885
15	Feb	19	TS18	closed	30.885
16	Feb	19	TS18	closed	31.009
17	Feb	19	TS18	closed	31.134
18	Feb	19	TS18	closed	31.322
19	Feb	19	TS18	closed	31.509
20	Feb	19	TS18	closed	31.634
21	Feb	19	TS18	closed	31.759
22	Feb	19	TS18	closed	31.259
23	Feb	19	TS18	closed	30.385
0	Feb	20	TS18	closed	30.322
1	Feb	20	TS18	closed	30.51
2	Feb	20	TS18	closed	30.697
3	Feb	20	TS18	closed	31.009
4	Feb	20	TS18	closed	31.259
5	Feb	20	TS18	closed	31.447
6	Feb	20	TS18	closed	31.572
7	Feb	20	TS18	closed	31.509
8	Feb	20	TS18	closed	31.447
9	Feb	20	TS18	closed	31.384
10	Feb	20	TS18	closed	31.134
11	Feb	20	TS18	closed	31.072
12	Feb	20	TS18	closed	31.197
13	Feb	20	TS18	closed	31.384
14	Feb	20	TS18	closed	31.447
15	Feb	20	TS18	closed	31.509
16	Feb	20	TS18	closed	31.572
17	Feb	20	TS18	closed	31.696
18	Feb	20	TS18	closed	31.509
19	Feb	20	TS18	closed	31.197
20	Feb	20	TS18	closed	31.197
21	Feb	20	TS18	closed	30.822
22	Feb	20	TS18	closed	30.322
23	Feb	20	TS18	closed	29.635
0	Feb	21	TS18	closed	28.948
1	Feb	21	TS18	closed	29.136
2	Feb	21	TS18	closed	29.635
3	Feb	21	TS18	closed	29.885
4	Feb	21	TS18	closed	30.26
5	Feb	21	TS18	closed	30.26
6	Feb	21	TS18	closed	29.948
7	Feb	21	TS18	closed	30.198
8	Feb	21	TS18	closed	30.198
9	Feb	21	TS18	closed	30.135
10	Feb	21	TS18	closed	30.26
11	Feb	21	TS18	closed	30.697
12	Feb	21	TS18	closed	30.76
13	Feb	21	TS18	closed	30.885
14	Feb	21	TS18	closed	31.134
15	Feb	21	TS18	closed	31.322
16	Feb	21	TS18	closed	31.009
17	Feb	21	TS18	closed	30.51
18	Feb	21	TS18	closed	29.073
19	Feb	21	TS18	closed	28.386
20	Feb	21	TS18	closed	27.761
21	Feb	21	TS18	closed	28.511
22	Feb	21	TS18	closed	28.074
23	Feb	21	TS18	closed	28.386
0	Feb	22	TS18	closed	28.636
1	Feb	22	TS18	closed	28.761
2	Feb	22	TS18	closed	28.886
3	Feb	22	TS18	closed	28.948
4	Feb	22	TS18	closed	29.011
5	Feb	22	TS18	closed	28.886
6	Feb	22	TS18	closed	29.073
7	Feb	22	TS18	closed	28.948
8	Feb	22	TS18	closed	29.011
9	Feb	22	TS18	closed	29.261
10	Feb	22	TS18	closed	29.573
11	Feb	22	TS18	closed	29.948
12	Feb	22	TS18	closed	30.26
13	Feb	22	TS18	closed	30.322
14	Feb	22	TS18	closed	30.447
15	Feb	22	TS18	closed	30.697
16	Feb	22	TS18	closed	30.322
17	Feb	22	TS18	closed	29.698
18	Feb	22	TS18	closed	29.511
19	Feb	22	TS18	closed	28.698
20	Feb	22	TS18	closed	28.261
21	Feb	22	TS18	closed	29.011
22	Feb	22	TS18	closed	28.948
23	Feb	22	TS18	closed	29.136
0	Feb	23	TS18	closed	29.073
1	Feb	23	TS18	closed	28.948
2	Feb	23	TS18	closed	28.636
3	Feb	23	TS18	closed	28.511
4	Feb	23	TS18	closed	28.698
5	Feb	23	TS18	closed	28.511
6	Feb	23	TS18	closed	28.698
7	Feb	23	TS18	closed	28.948
8	Feb	23	TS18	closed	29.073
9	Feb	23	TS18	closed	29.073
10	Feb	23	TS18	closed	29.261
11	Feb	23	TS18	closed	29.573
12	Feb	23	TS18	closed	29.823
13	Feb	23	TS18	closed	30.01
14	Feb	23	TS18	closed	30.26
15	Feb	23	TS18	closed	30.385
16	Feb	23	TS18	closed	30.447
17	Feb	23	TS18	closed	30.447
18	Feb	23	TS18	closed	30.135
19	Feb	23	TS18	closed	29.386
20	Feb	23	TS18	closed	29.448
21	Feb	23	TS18	closed	29.323
22	Feb	23	TS18	closed	29.635
23	Feb	23	TS18	closed	29.448
0	Feb	24	TS18	closed	29.198
1	Feb	24	TS18	closed	29.573
2	Feb	24	TS18	closed	29.448
3	Feb	24	TS18	closed	29.635
4	Feb	24	TS18	closed	29.698
5	Feb	24	TS18	closed	29.823
6	Feb	24	TS18	closed	29.948
7	Feb	24	TS18	closed	29.885
8	Feb	24	TS18	closed	29.823
9	Feb	24	TS18	closed	29.885
10	Feb	24	TS18	closed	30.135
11	Feb	24	TS18	closed	30.447
12	Feb	24	TS18	closed	30.885
13	Feb	24	TS18	closed	31.259
14	Feb	24	TS18	closed	31.322
15	Feb	24	TS18	closed	31.322
16	Feb	24	TS18	closed	31.447
17	Feb	24	TS18	closed	31.509
18	Feb	24	TS18	closed	31.696
19	Feb	24	TS18	closed	30.635
20	Feb	24	TS18	closed	30.26
21	Feb	24	TS18	closed	30.76
22	Feb	24	TS18	closed	30.572
23	Feb	24	TS18	closed	30.51
0	Feb	25	TS18	closed	30.01
1	Feb	25	TS18	closed	30.073
2	Feb	25	TS18	closed	30.385
3	Feb	25	TS18	closed	30.51
4	Feb	25	TS18	closed	30.635
5	Feb	25	TS18	closed	30.697
6	Feb	25	TS18	closed	30.697
[truncated: 10,937 more rows]
