# Supplementary material for: Termite mound architecture regulates nest temperature and correlates with species identities of symbiotic fungi
Source: PeerJ. 2019 Jan 16;6:e6237. doi: 10.7717/peerj.6237 (PMC6339472; doi:10.7717/peerj.6237)
Supplement: Supplemental Information 6 — Diurnal mean temperatures (fungus chambers) and architectural parameters of Macrotermes subhyalinus mounds studied during the second measurement campaign (1st March 2016–31st March 2017) and simultaneous mean temperatures measured at the weather station. Diurnal mean temperatures and standard deviations are calculated from values registered on every three hours (eight measurements per each day). [file peerj-07-6237-s006.xlsx]

## Sheet: Campaign2_Subhyalinus_temperatu
name	site	type	status	fungi	month	day	LAI	height	width	volume	area	openings_nbr	openings_max_dist	day_mean_nest	day_std_nest	day_mean_station	day_std_station	previous_day_mean_station
TM10	Maktau	large	active	A	Mar_16	1	0	1.55	3	4.2861	17.426	34	3.6	28.967	0.345	23.43	3.973	22.89
TM10	Maktau	large	active	A	Mar_16	2	0	1.55	3	4.2861	17.426	34	3.6	29.314	0.222	24.92	5.164	23.43
TM10	Maktau	large	active	A	Mar_16	3	0	1.55	3	4.2861	17.426	34	3.6	29.326	0.203	24.8	3.991	24.92
TM10	Maktau	large	active	A	Mar_16	4	0	1.55	3	4.2861	17.426	34	3.6	28.842	0.3	25.01	4.385	24.8
TM10	Maktau	large	active	A	Mar_16	5	0	1.55	3	4.2861	17.426	34	3.6	28.542	0.276	24.28	5.121	25.01
TM10	Maktau	large	active	A	Mar_16	6	0	1.55	3	4.2861	17.426	34	3.6	28.538	0.265	25.24	5.036	24.28
TM10	Maktau	large	active	A	Mar_16	7	0	1.55	3	4.2861	17.426	34	3.6	29.252	0.295	25.41	4.452	25.24
TM10	Maktau	large	active	A	Mar_16	8	0	1.55	3	4.2861	17.426	34	3.6	29.447	0.195	25.67	5.154	25.41
TM10	Maktau	large	active	A	Mar_16	9	0	1.55	3	4.2861	17.426	34	3.6	29.401	0.159	24.48	3.963	25.67
TM10	Maktau	large	active	A	Mar_16	10	0	1.55	3	4.2861	17.426	34	3.6	28.647	0.331	22.8	4.435	24.48
TM10	Maktau	large	active	A	Mar_16	11	0	1.55	3	4.2861	17.426	34	3.6	28.386	0.192	25.63	4.472	22.8
TM10	Maktau	large	active	A	Mar_16	12	0	1.55	3	4.2861	17.426	34	3.6	29.014	0.311	25.95	4.289	25.63
TM10	Maktau	large	active	A	Mar_16	13	0	1.55	3	4.2861	17.426	34	3.6	29.061	0.446	24.95	6.024	25.95
TM10	Maktau	large	active	A	Mar_16	14	0	1.55	3	4.2861	17.426	34	3.6	28.701	0.257	25.95	4.829	24.95
TM10	Maktau	large	active	A	Mar_16	15	0	1.55	3	4.2861	17.426	34	3.6	28.714	0.197	25.48	5.016	25.95
TM10	Maktau	large	active	A	Mar_16	16	0	1.55	3	4.2861	17.426	34	3.6	28.885	0.274	25.93	5.507	25.48
TM10	Maktau	large	active	A	Mar_16	17	0	1.55	3	4.2861	17.426	34	3.6	29.856	0.405	25.44	4.363	25.93
TM10	Maktau	large	active	A	Mar_16	18	0	1.55	3	4.2861	17.426	34	3.6	30.384	0.108	26.16	3.938	25.44
TM10	Maktau	large	active	A	Mar_16	19	0	1.55	3	4.2861	17.426	34	3.6	30.033	0.359	25.19	4.529	26.16
TM10	Maktau	large	active	A	Mar_16	20	0	1.55	3	4.2861	17.426	34	3.6	29.491	0.42	26.1	4.998	25.19
TM10	Maktau	large	active	A	Mar_16	21	0	1.55	3	4.2861	17.426	34	3.6	29.537	0.312	26.15	4.351	26.1
TM10	Maktau	large	active	A	Mar_16	22	0	1.55	3	4.2861	17.426	34	3.6	29.017	0.489	26.29	4.692	26.15
TM10	Maktau	large	active	A	Mar_16	23	0	1.55	3	4.2861	17.426	34	3.6	29.276	0.372	26.48	4.831	26.29
TM10	Maktau	large	active	A	Mar_16	24	0	1.55	3	4.2861	17.426	34	3.6	29.205	0.444	26.21	5.129	26.48
TM10	Maktau	large	active	A	Mar_16	25	0	1.55	3	4.2861	17.426	34	3.6	28.787	0.464	24.12	4.279	26.21
TM10	Maktau	large	active	A	Mar_16	26	0	1.55	3	4.2861	17.426	34	3.6	28.089	0.491	24.51	4.704	24.12
TM10	Maktau	large	active	A	Mar_16	27	0	1.55	3	4.2861	17.426	34	3.6	28.362	0.473	25.63	5.669	24.51
TM10	Maktau	large	active	A	Mar_16	28	0	1.55	3	4.2861	17.426	34	3.6	29.619	0.34	27.04	5.613	25.63
TM10	Maktau	large	active	A	Mar_16	29	0	1.55	3	4.2861	17.426	34	3.6	30.662	0.458	26.84	4.98	27.04
TM10	Maktau	large	active	A	Mar_16	30	0	1.55	3	4.2861	17.426	34	3.6	31.214	0.411	26.75	4.903	26.84
TM10	Maktau	large	active	A	Mar_16	31	0	1.55	3	4.2861	17.426	34	3.6	31.328	0.11	26.8	4.922	26.75
TM10	Maktau	large	active	A	Apr_16	1	0	1.55	3	4.2861	17.426	34	3.6	31.263	0.333	23.6	1.852	26.8
TM10	Maktau	large	active	A	Apr_16	2	0	1.55	3	4.2861	17.426	34	3.6	30.495	0.443	21.14	1.049	23.6
TM10	Maktau	large	active	A	Apr_16	3	0	1.55	3	4.2861	17.426	34	3.6	28.678	0.528	22.39	2.419	21.14
TM10	Maktau	large	active	A	Apr_16	4	0	1.55	3	4.2861	17.426	34	3.6	28.183	0.229	21.78	2.927	22.39
TM10	Maktau	large	active	A	Apr_16	5	0	1.55	3	4.2861	17.426	34	3.6	27.161	0.326	21.91	2.777	21.78
TM10	Maktau	large	active	A	Apr_16	6	0	1.55	3	4.2861	17.426	34	3.6	27.449	0.274	23.23	2.858	21.91
TM10	Maktau	large	active	A	Apr_16	7	0	1.55	3	4.2861	17.426	34	3.6	28.231	0.297	23.14	4.322	23.23
TM10	Maktau	large	active	A	Apr_16	8	0	1.55	3	4.2861	17.426	34	3.6	28.819	0.489	23.73	3.852	23.14
TM10	Maktau	large	active	A	Apr_16	9	0	1.55	3	4.2861	17.426	34	3.6	29.689	0.151	22.65	3.831	23.73
TM10	Maktau	large	active	A	Apr_16	10	0	1.55	3	4.2861	17.426	34	3.6	29.611	0.221	22.79	3.38	22.65
TM10	Maktau	large	active	A	Apr_16	11	0	1.55	3	4.2861	17.426	34	3.6	29.002	0.439	22.33	2.8	22.79
TM10	Maktau	large	active	A	Apr_16	12	0	1.55	3	4.2861	17.426	34	3.6	28.223	0.3	22.84	3.418	22.33
TM10	Maktau	large	active	A	Apr_16	13	0	1.55	3	4.2861	17.426	34	3.6	28.144	0.386	22.43	2.799	22.84
TM10	Maktau	large	active	A	Apr_16	14	0	1.55	3	4.2861	17.426	34	3.6	28.067	0.144	22.41	2.834	22.43
TM10	Maktau	large	active	A	Apr_16	15	0	1.55	3	4.2861	17.426	34	3.6	28.168	0.148	22.64	2.81	22.41
TM10	Maktau	large	active	A	Apr_16	16	0	1.55	3	4.2861	17.426	34	3.6	28.331	0.106	21.35	1.754	22.64
TM10	Maktau	large	active	A	Apr_16	17	0	1.55	3	4.2861	17.426	34	3.6	28.308	0.217	22.26	2.866	21.35
TM10	Maktau	large	active	A	Apr_16	18	0	1.55	3	4.2861	17.426	34	3.6	28.425	0.19	23.04	3.842	22.26
TM10	Maktau	large	active	A	Apr_16	19	0	1.55	3	4.2861	17.426	34	3.6	28.823	0.188	24.12	3.978	23.04
TM10	Maktau	large	active	A	Apr_16	20	0	1.55	3	4.2861	17.426	34	3.6	29.338	0.142	23.96	3.562	24.12
TM10	Maktau	large	active	A	Apr_16	21	0	1.55	3	4.2861	17.426	34	3.6	29.291	0.269	22.69	2.73	23.96
TM10	Maktau	large	active	A	Apr_16	22	0	1.55	3	4.2861	17.426	34	3.6	29.147	0.3	22.81	2.829	22.69
TM10	Maktau	large	active	A	Apr_16	23	0	1.55	3	4.2861	17.426	34	3.6	29.186	0.338	23.57	2.962	22.81
TM10	Maktau	large	active	A	Apr_16	24	0	1.55	3	4.2861	17.426	34	3.6	29.163	0.284	23.63	3.284	23.57
TM10	Maktau	large	active	A	Apr_16	25	0	1.55	3	4.2861	17.426	34	3.6	28.94	0.302	22.84	2.93	23.63
TM10	Maktau	large	active	A	Apr_16	26	0	1.55	3	4.2861	17.426	34	3.6	28.518	0.21	22.61	3.698	22.84
TM10	Maktau	large	active	A	Apr_16	27	0	1.55	3	4.2861	17.426	34	3.6	28.499	0.253	22.2	3.34	22.61
TM10	Maktau	large	active	A	Apr_16	28	0	1.55	3	4.2861	17.426	34	3.6	28.156	0.18	21.62	3.225	22.2
TM10	Maktau	large	active	A	Apr_16	29	0	1.55	3	4.2861	17.426	34	3.6	28.207	0.26	21.67	2.683	21.62
TM10	Maktau	large	active	A	Apr_16	30	0	1.55	3	4.2861	17.426	34	3.6	28.195	0.345	22.2	3.227	21.67
TM10	Maktau	large	active	A	May_16	1	0	1.55	3	4.2861	17.426	34	3.6	28.003	0.175	22.71	3.999	22.2
TM10	Maktau	large	active	A	May_16	2	0	1.55	3	4.2861	17.426	34	3.6	28.121	0.315	22.56	4.319	22.71
TM10	Maktau	large	active	A	May_16	3	0	1.55	3	4.2861	17.426	34	3.6	28.206	0.181	22.82	4.201	22.56
TM10	Maktau	large	active	A	May_16	4	0	1.55	3	4.2861	17.426	34	3.6	28.332	0.227	23.27	4.166	22.82
TM10	Maktau	large	active	A	May_16	5	0	1.55	3	4.2861	17.426	34	3.6	28.643	0.085	21.78	1.996	23.27
TM10	Maktau	large	active	A	May_16	6	0	1.55	3	4.2861	17.426	34	3.6	27.835	0.591	21.56	3.44	21.78
TM10	Maktau	large	active	A	May_16	7	0	1.55	3	4.2861	17.426	34	3.6	27.027	0.274	21.09	4.205	21.56
TM10	Maktau	large	active	A	May_16	8	0	1.55	3	4.2861	17.426	34	3.6	26.746	0.301	21.52	4.328	21.09
TM10	Maktau	large	active	A	May_16	9	0	1.55	3	4.2861	17.426	34	3.6	26.813	0.196	20.94	4.019	21.52
TM10	Maktau	large	active	A	May_16	10	0	1.55	3	4.2861	17.426	34	3.6	26.983	0.449	19.55	1.796	20.94
TM10	Maktau	large	active	A	May_16	11	0	1.55	3	4.2861	17.426	34	3.6	26.23	0.212	20.98	3.553	19.55
TM10	Maktau	large	active	A	May_16	12	0	1.55	3	4.2861	17.426	34	3.6	26.366	0.197	21.1	3.779	20.98
TM10	Maktau	large	active	A	May_16	13	0	1.55	3	4.2861	17.426	34	3.6	26.703	0.192	20.84	3.716	21.1
TM10	Maktau	large	active	A	May_16	14	0	1.55	3	4.2861	17.426	34	3.6	27.232	0.223	21.36	3.399	20.84
TM10	Maktau	large	active	A	May_16	15	0	1.55	3	4.2861	17.426	34	3.6	27.29	0.262	22.06	4.524	21.36
TM10	Maktau	large	active	A	May_16	16	0	1.55	3	4.2861	17.426	34	3.6	27.438	0.179	22.31	4.693	22.06
TM10	Maktau	large	active	A	May_16	17	0	1.55	3	4.2861	17.426	34	3.6	27.836	0.346	23.02	4.253	22.31
TM10	Maktau	large	active	A	May_16	18	0	1.55	3	4.2861	17.426	34	3.6	28.176	0.119	22.02	3.383	23.02
TM10	Maktau	large	active	A	May_16	19	0	1.55	3	4.2861	17.426	34	3.6	27.805	0.313	21.05	3.703	22.02
TM10	Maktau	large	active	A	May_16	20	0	1.55	3	4.2861	17.426	34	3.6	27.303	0.393	21.48	4.843	21.05
TM10	Maktau	large	active	A	May_16	21	0	1.55	3	4.2861	17.426	34	3.6	26.79	0.428	19.67	1.985	21.48
TM10	Maktau	large	active	A	May_16	22	0	1.55	3	4.2861	17.426	34	3.6	26.226	0.277	21.43	3.524	19.67
TM10	Maktau	large	active	A	May_16	23	0	1.55	3	4.2861	17.426	34	3.6	26.086	0.239	20.1	2.993	21.43
TM10	Maktau	large	active	A	May_16	24	0	1.55	3	4.2861	17.426	34	3.6	25.76	0.199	20.71	4.119	20.1
TM10	Maktau	large	active	A	May_16	25	0	1.55	3	4.2861	17.426	34	3.6	25.715	0.189	21.31	4.309	20.71
TM10	Maktau	large	active	A	May_16	26	0	1.55	3	4.2861	17.426	34	3.6	25.812	0.211	20.22	3.705	21.31
TM10	Maktau	large	active	A	May_16	27	0	1.55	3	4.2861	17.426	34	3.6	25.369	0.288	20.55	4.209	20.22
TM10	Maktau	large	active	A	May_16	28	0	1.55	3	4.2861	17.426	34	3.6	25.32	0.167	20.74	4.643	20.55
TM10	Maktau	large	active	A	May_16	29	0	1.55	3	4.2861	17.426	34	3.6	25.621	0.165	20.84	4.949	20.74
TM10	Maktau	large	active	A	May_16	30	0	1.55	3	4.2861	17.426	34	3.6	26.127	0.186	21.71	4.818	20.84
TM10	Maktau	large	active	A	May_16	31	0	1.55	3	4.2861	17.426	34	3.6	26.798	0.369	22.43	4.546	21.71
TM10	Maktau	large	active	A	Jun_16	1	0	1.55	3	4.2861	17.426	34	3.6	27.117	0.132	22.3	4.367	22.43
TM10	Maktau	large	active	A	Jun_16	2	0	1.55	3	4.2861	17.426	34	3.6	27.482	0.174	22.38	4.012	22.3
TM10	Maktau	large	active	A	Jun_16	3	0	1.55	3	4.2861	17.426	34	3.6	27.318	0.236	21	3.155	22.38
TM10	Maktau	large	active	A	Jun_16	4	0	1.55	3	4.2861	17.426	34	3.6	27.139	0.396	21.84	4.093	21
TM10	Maktau	large	active	A	Jun_16	5	0	1.55	3	4.2861	17.426	34	3.6	26.931	0.355	22.06	4.417	21.84
TM10	Maktau	large	active	A	Jun_16	6	0	1.55	3	4.2861	17.426	34	3.6	27.058	0.42	21.82	4.116	22.06
TM10	Maktau	large	active	A	Jun_16	7	0	1.55	3	4.2861	17.426	34	3.6	26.719	0.24	21.65	4.477	21.82
TM10	Maktau	large	active	A	Jun_16	8	0	1.55	3	4.2861	17.426	34	3.6	26.499	0.289	21.01	4.912	21.65
TM10	Maktau	large	active	A	Jun_16	9	0	1.55	3	4.2861	17.426	34	3.6	26.017	0.244	20.5	4.626	21.01
TM10	Maktau	large	active	A	Jun_16	10	0	1.55	3	4.2861	17.426	34	3.6	25.851	0.4	20.66	4.506	20.5
TM10	Maktau	large	active	A	Jun_16	11	0	1.55	3	4.2861	17.426	34	3.6	25.736	0.219	20.55	3.203	20.66
TM10	Maktau	large	active	A	Jun_16	12	0	1.55	3	4.2861	17.426	34	3.6	25.861	0.116	20.93	3.098	20.55
TM10	Maktau	large	active	A	Jun_16	13	0	1.55	3	4.2861	17.426	34	3.6	25.655	0.514	20.1	4.037	20.93
TM10	Maktau	large	active	A	Jun_16	14	0	1.55	3	4.2861	17.426	34	3.6	24.926	0.375	20.63	5.877	20.1
TM10	Maktau	large	active	A	Jun_16	15	0	1.55	3	4.2861	17.426	34	3.6	25.174	0.379	21.33	5.05	20.63
TM10	Maktau	large	active	A	Jun_16	16	0	1.55	3	4.2861	17.426	34	3.6	25.496	0.132	21.26	4.16	21.33
TM10	Maktau	large	active	A	Jun_16	17	0	1.55	3	4.2861	17.426	34	3.6	25.699	0.174	21.22	5.061	21.26
TM10	Maktau	large	active	A	Jun_16	18	0	1.55	3	4.2861	17.426	34	3.6	26.337	0.331	21.57	3.731	21.22
TM10	Maktau	large	active	A	Jun_16	19	0	1.55	3	4.2861	17.426	34	3.6	26.332	0.13	21.48	3.85	21.57
TM10	Maktau	large	active	A	Jun_16	20	0	1.55	3	4.2861	17.426	34	3.6	26.332	0.145	20.84	3.191	21.48
TM10	Maktau	large	active	A	Jun_16	21	0	1.55	3	4.2861	17.426	34	3.6	26.113	0.29	20.16	3.267	20.84
TM10	Maktau	large	active	A	Jun_16	22	0	1.55	3	4.2861	17.426	34	3.6	25.444	0.309	19.21	1.849	20.16
TM10	Maktau	large	active	A	Jun_16	23	0	1.55	3	4.2861	17.426	34	3.6	24.546	0.194	20.49	3.64	19.21
TM10	Maktau	large	active	A	Jun_16	24	0	1.55	3	4.2861	17.426	34	3.6	24.355	0.153	19.56	3.248	20.49
TM10	Maktau	large	active	A	Jun_16	25	0	1.55	3	4.2861	17.426	34	3.6	24.14	0.173	19.82	3.134	19.56
TM10	Maktau	large	active	A	Jun_16	26	0	1.55	3	4.2861	17.426	34	3.6	24.145	0.373	20.5	3.501	19.82
TM10	Maktau	large	active	A	Jun_16	27	0	1.55	3	4.2861	17.426	34	3.6	24.613	0.121	20.62	3.71	20.5
TM10	Maktau	large	active	A	Jun_16	28	0	1.55	3	4.2861	17.426	34	3.6	25.19	0.343	20.83	4.843	20.62
TM10	Maktau	large	active	A	Jun_16	29	0	1.55	3	4.2861	17.426	34	3.6	25.371	0.087	20.03	3.563	20.83
TM10	Maktau	large	active	A	Jun_16	30	0	1.55	3	4.2861	17.426	34	3.6	24.838	0.313	20.15	4.417	20.03
TM10	Maktau	large	active	A	Jul_16	1	0	1.55	3	4.2861	17.426	34	3.6	24.684	0.19	19.88	4.258	20.15
TM10	Maktau	large	active	A	Jul_16	2	0	1.55	3	4.2861	17.426	34	3.6	24.927	0.169	20.31	3.403	19.88
TM10	Maktau	large	active	A	Jul_16	3	0	1.55	3	4.2861	17.426	34	3.6	24.797	0.228	20.18	3.939	20.31
TM10	Maktau	large	active	A	Jul_16	4	0	1.55	3	4.2861	17.426	34	3.6	24.21	0.423	19.89	5.514	20.18
TM10	Maktau	large	active	A	Jul_16	5	0	1.55	3	4.2861	17.426	34	3.6	24.187	0.261	19.44	4.345	19.89
TM10	Maktau	large	active	A	Jul_16	6	0	1.55	3	4.2861	17.426	34	3.6	24.002	0.219	19.06	3.391	19.44
TM10	Maktau	large	active	A	Jul_16	7	0	1.55	3	4.2861	17.426	34	3.6	23.574	0.283	18.66	3.3	19.06
TM10	Maktau	large	active	A	Jul_16	8	0	1.55	3	4.2861	17.426	34	3.6	22.984	0.248	18.39	3.012	18.66
TM10	Maktau	large	active	A	Jul_16	9	0	1.55	3	4.2861	17.426	34	3.6	22.303	0.239	18.32	4.17	18.39
TM10	Maktau	large	active	A	Jul_16	10	0	1.55	3	4.2861	17.426	34	3.6	22.405	0.215	18.63	3.257	18.32
TM10	Maktau	large	active	A	Jul_16	11	0	1.55	3	4.2861	17.426	34	3.6	22.276	0.301	18.18	3.085	18.63
TM10	Maktau	large	active	A	Jul_16	12	0	1.55	3	4.2861	17.426	34	3.6	22.097	0.21	17.61	2.89	18.18
TM10	Maktau	large	active	A	Jul_16	13	0	1.55	3	4.2861	17.426	34	3.6	21.612	0.179	18.38	3.212	17.61
TM10	Maktau	large	active	A	Jul_16	14	0	1.55	3	4.2861	17.426	34	3.6	21.784	0.182	18.88	4.681	18.38
TM10	Maktau	large	active	A	Jul_16	15	0	1.55	3	4.2861	17.426	34	3.6	22.221	0.082	18.3	3.217	18.88
TM10	Maktau	large	active	A	Jul_16	16	0	1.55	3	4.2861	17.426	34	3.6	22.331	0.184	19.4	3.132	18.3
TM10	Maktau	large	active	A	Jul_16	17	0	1.55	3	4.2861	17.426	34	3.6	22.252	0.131	20.23	3.91	19.4
TM10	Maktau	large	active	A	Jul_16	18	0	1.55	3	4.2861	17.426	34	3.6	22.597	0.129	19.11	3.37	20.23
TM10	Maktau	large	active	A	Jul_16	19	0	1.55	3	4.2861	17.426	34	3.6	22.534	0.15	19.63	4.28	19.11
TM10	Maktau	large	active	A	Jul_16	20	0	1.55	3	4.2861	17.426	34	3.6	22.675	0.182	19.55	5.141	19.63
TM10	Maktau	large	active	A	Jul_16	21	0	1.55	3	4.2861	17.426	34	3.6	23.24	0.337	19.75	4.401	19.55
TM10	Maktau	large	active	A	Jul_16	22	0	1.55	3	4.2861	17.426	34	3.6	23.449	0.185	20.45	4.583	19.75
TM10	Maktau	large	active	A	Jul_16	23	0	1.55	3	4.2861	17.426	34	3.6	23.636	0.26	20.92	5.429	20.45
TM10	Maktau	large	active	A	Jul_16	24	0	1.55	3	4.2861	17.426	34	3.6	24.015	0.337	20.37	4.875	20.92
TM10	Maktau	large	active	A	Jul_16	25	0	1.55	3	4.2861	17.426	34	3.6	24.293	0.083	20.23	3.148	20.37
TM10	Maktau	large	active	A	Jul_16	26	0	1.55	3	4.2861	17.426	34	3.6	23.945	0.296	20.24	4.69	20.23
TM10	Maktau	large	active	A	Jul_16	27	0	1.55	3	4.2861	17.426	34	3.6	24.103	0.125	21.07	4.639	20.24
TM10	Maktau	large	active	A	Jul_16	28	0	1.55	3	4.2861	17.426	34	3.6	24.306	0.277	20.13	4.646	21.07
TM10	Maktau	large	active	A	Jul_16	29	0	1.55	3	4.2861	17.426	34	3.6	24.496	0.152	20.85	4.252	20.13
TM10	Maktau	large	active	A	Jul_16	30	0	1.55	3	4.2861	17.426	34	3.6	24.34	0.345	20.44	5.177	20.85
TM10	Maktau	large	active	A	Jul_16	31	0	1.55	3	4.2861	17.426	34	3.6	24.373	0.346	20.3	6.04	20.44
TM10	Maktau	large	active	A	Aug_16	1	0	1.55	3	4.2861	17.426	34	3.6	23.887	0.424	20.1	4.903	20.3
TM10	Maktau	large	active	A	Aug_16	2	0	1.55	3	4.2861	17.426	34	3.6	23.865	0.551	20.05	6.451	20.1
TM10	Maktau	large	active	A	Aug_16	3	0	1.55	3	4.2861	17.426	34	3.6	23.858	0.565	20.26	5.908	20.05
TM10	Maktau	large	active	A	Aug_16	4	0	1.55	3	4.2861	17.426	34	3.6	24.22	0.254	20.64	4.101	20.26
TM10	Maktau	large	active	A	Aug_16	5	0	1.55	3	4.2861	17.426	34	3.6	23.926	0.387	18.55	3.409	20.64
TM10	Maktau	large	active	A	Aug_16	6	0	1.55	3	4.2861	17.426	34	3.6	23.043	0.293	19.75	3.35	18.55
TM10	Maktau	large	active	A	Aug_16	7	0	1.55	3	4.2861	17.426	34	3.6	22.7	0.274	19.21	3.765	19.75
TM10	Maktau	large	active	A	Aug_16	8	0	1.55	3	4.2861	17.426	34	3.6	22.574	0.14	19.46	2.808	19.21
TM10	Maktau	large	active	A	Aug_16	9	0	1.55	3	4.2861	17.426	34	3.6	22.44	0.164	18.49	1.881	19.46
TM10	Maktau	large	active	A	Aug_16	10	0	1.55	3	4.2861	17.426	34	3.6	21.635	0.298	18.7	5.09	18.49
TM10	Maktau	large	active	A	Aug_16	11	0	1.55	3	4.2861	17.426	34	3.6	21.873	0.249	19.6	4.064	18.7
TM10	Maktau	large	active	A	Aug_16	12	0	1.55	3	4.2861	17.426	34	3.6	22.476	0.209	19.36	3.986	19.6
TM10	Maktau	large	active	A	Aug_16	13	0	1.55	3	4.2861	17.426	34	3.6	22.667	0.16	20.19	3.357	19.36
TM10	Maktau	large	active	A	Aug_16	14	0	1.55	3	4.2861	17.426	34	3.6	22.958	0.38	19.46	3.423	20.19
TM10	Maktau	large	active	A	Aug_16	15	0	1.55	3	4.2861	17.426	34	3.6	23.371	0.112	19.38	2.605	19.46
TM10	Maktau	large	active	A	Aug_16	16	0	1.55	3	4.2861	17.426	34	3.6	23.134	0.35	18.93	3.28	19.38
TM10	Maktau	large	active	A	Aug_16	17	0	1.55	3	4.2861	17.426	34	3.6	22.483	0.29	20.84	4.883	18.93
TM10	Maktau	large	active	A	Aug_16	18	0	1.55	3	4.2861	17.426	34	3.6	23.134	0.32	20.09	4.579	20.84
TM10	Maktau	large	active	A	Aug_16	19	0	1.55	3	4.2861	17.426	34	3.6	23.414	0.227	21.04	4.841	20.09
TM10	Maktau	large	active	A	Aug_16	20	0	1.55	3	4.2861	17.426	34	3.6	23.675	0.214	20.58	4.201	21.04
TM10	Maktau	large	active	A	Aug_16	21	0	1.55	3	4.2861	17.426	34	3.6	23.767	0.472	19.82	5.555	20.58
TM10	Maktau	large	active	A	Aug_16	22	0	1.55	3	4.2861	17.426	34	3.6	24.145	0.383	21.08	4.831	19.82
TM10	Maktau	large	active	A	Aug_16	23	0	1.55	3	4.2861	17.426	34	3.6	24.215	0.187	20.64	4.584	21.08
TM10	Maktau	large	active	A	Aug_16	24	0	1.55	3	4.2861	17.426	34	3.6	23.931	0.484	19.38	4.883	20.64
TM10	Maktau	large	active	A	Aug_16	25	0	1.55	3	4.2861	17.426	34	3.6	23.527	0.263	18.64	4.909	19.38
TM10	Maktau	large	active	A	Aug_16	26	0	1.55	3	4.2861	17.426	34	3.6	23.47	0.189	19.05	3.525	18.64
TM10	Maktau	large	active	A	Aug_16	27	0	1.55	3	4.2861	17.426	34	3.6	23.433	0.192	19.51	3.79	19.05
TM10	Maktau	large	active	A	Aug_16	28	0	1.55	3	4.2861	17.426	34	3.6	23.496	0.209	20.31	3.858	19.51
TM10	Maktau	large	active	A	Aug_16	29	0	1.55	3	4.2861	17.426	34	3.6	23.55	0.27	18.48	3.45	20.31
TM10	Maktau	large	active	A	Aug_16	30	0	1.55	3	4.2861	17.426	34	3.6	23.128	0.353	18.86	4.54	18.48
TM10	Maktau	large	active	A	Aug_16	31	0	1.55	3	4.2861	17.426	34	3.6	22.847	0.276	19.68	4.775	18.86
TM10	Maktau	large	active	A	Sep_16	1	0	1.55	3	4.2861	17.426	34	3.6	22.977	0.377	17.19	2.196	19.68
TM10	Maktau	large	active	A	Sep_16	2	0	1.55	3	4.2861	17.426	34	3.6	22.476	0.195	18.73	3.353	17.19
TM10	Maktau	large	active	A	Sep_16	3	0	1.55	3	4.2861	17.426	34	3.6	22.311	0.226	19.33	3.826	18.73
TM10	Maktau	large	active	A	Sep_16	4	0	1.55	3	4.2861	17.426	34	3.6	22.456	0.239	19.75	4.37	19.33
TM10	Maktau	large	active	A	Sep_16	5	0	1.55	3	4.2861	17.426	34	3.6	22.933	0.195	18.92	3.233	19.75
TM10	Maktau	large	active	A	Sep_16	6	0	1.55	3	4.2861	17.426	34	3.6	22.805	0.397	19.81	3.632	18.92
TM10	Maktau	large	active	A	Sep_16	7	0	1.55	3	4.2861	17.426	34	3.6	23.351	0.238	19.52	2.923	19.81
TM10	Maktau	large	active	A	Sep_16	8	0	1.55	3	4.2861	17.426	34	3.6	22.704	0.486	20.53	5.917	19.52
TM10	Maktau	large	active	A	Sep_16	9	0	1.55	3	4.2861	17.426	34	3.6	23.258	0.187	21.04	4.37	20.53
TM10	Maktau	large	active	A	Sep_16	10	0	1.55	3	4.2861	17.426	34	3.6	23.597	0.177	18.8	3.838	21.04
TM10	Maktau	large	active	A	Sep_16	11	0	1.55	3	4.2861	17.426	34	3.6	23.126	0.387	20.42	5.239	18.8
TM10	Maktau	large	active	A	Sep_16	12	0	1.55	3	4.2861	17.426	34	3.6	23.334	0.244	21.34	4.56	20.42
TM10	Maktau	large	active	A	Sep_16	13	0	1.55	3	4.2861	17.426	34	3.6	23.289	0.316	19.96	5.583	21.34
TM10	Maktau	large	active	A	Sep_16	14	0	1.55	3	4.2861	17.426	34	3.6	23.488	0.185	19.25	2.799	19.96
TM10	Maktau	large	active	A	Sep_16	15	0	1.55	3	4.2861	17.426	34	3.6	23.443	0.206	21.3	4.757	19.25
TM10	Maktau	large	active	A	Sep_16	16	0	1.55	3	4.2861	17.426	34	3.6	23.868	0.352	20.86	4.164	21.3
TM10	Maktau	large	active	A	Sep_16	17	0	1.55	3	4.2861	17.426	34	3.6	23.934	0.225	21.23	5.243	20.86
TM10	Maktau	large	active	A	Sep_16	18	0	1.55	3	4.2861	17.426	34	3.6	24.088	0.211	20.06	4.882	21.23
TM10	Maktau	large	active	A	Sep_16	19	0	1.55	3	4.2861	17.426	34	3.6	23.588	0.364	20.41	5.113	20.06
TM10	Maktau	large	active	A	Sep_16	20	0	1.55	3	4.2861	17.426	34	3.6	23.313	0.29	19.76	4.752	20.41
TM10	Maktau	large	active	A	Sep_16	21	0	1.55	3	4.2861	17.426	34	3.6	23.165	0.338	20.31	4.627	19.76
TM10	Maktau	large	active	A	Sep_16	22	0	1.55	3	4.2861	17.426	34	3.6	23.235	0.243	20	4.635	20.31
TM10	Maktau	large	active	A	Sep_16	23	0	1.55	3	4.2861	17.426	34	3.6	23.605	0.187	20.58	3.99	20
TM10	Maktau	large	active	A	Sep_16	24	0	1.55	3	4.2861	17.426	34	3.6	23.937	0.162	20.71	3.641	20.58
TM10	Maktau	large	active	A	Sep_16	25	0	1.55	3	4.2861	17.426	34	3.6	24.152	0.212	21.79	4.683	20.71
TM10	Maktau	large	active	A	Sep_16	26	0	1.55	3	4.2861	17.426	34	3.6	24.543	0.187	21.34	4.984	21.79
TM10	Maktau	large	active	A	Sep_16	27	0	1.55	3	4.2861	17.426	34	3.6	24.371	0.325	20.93	5.258	21.34
TM10	Maktau	large	active	A	Sep_16	28	0	1.55	3	4.2861	17.426	34	3.6	24.643	0.215	21.41	3.669	20.93
TM10	Maktau	large	active	A	Sep_16	29	0	1.55	3	4.2861	17.426	34	3.6	25.023	0.159	20.55	3.421	21.41
TM10	Maktau	large	active	A	Sep_16	30	0	1.55	3	4.2861	17.426	34	3.6	24.97	0.39	21.69	4.874	20.55
TM10	Maktau	large	active	A	Oct_16	1	0	1.55	3	4.2861	17.426	34	3.6	24.648	0.337	20.74	4.938	21.69
TM10	Maktau	large	active	A	Oct_16	2	0	1.55	3	4.2861	17.426	34	3.6	24.321	0.277	20.28	3.846	20.74
TM10	Maktau	large	active	A	Oct_16	3	0	1.55	3	4.2861	17.426	34	3.6	24.673	0.432	22.72	5.442	20.28
TM10	Maktau	large	active	A	Oct_16	4	0	1.55	3	4.2861	17.426	34	3.6	25.15	0.197	22.38	4.583	22.72
TM10	Maktau	large	active	A	Oct_16	5	0	1.55	3	4.2861	17.426	34	3.6	25.246	0.225	21.51	3.604	22.38
TM10	Maktau	large	active	A	Oct_16	6	0	1.55	3	4.2861	17.426	34	3.6	24.885	0.326	21.29	4.597	21.51
TM10	Maktau	large	active	A	Oct_16	7	0	1.55	3	4.2861	17.426	34	3.6	25.114	0.412	23.12	5.721	21.29
TM10	Maktau	large	active	A	Oct_16	8	0	1.55	3	4.2861	17.426	34	3.6	24.9	0.356	22.66	6.063	23.12
TM10	Maktau	large	active	A	Oct_16	9	0	1.55	3	4.2861	17.426	34	3.6	25.454	0.2	22.76	4.997	22.66
TM10	Maktau	large	active	A	Oct_16	10	0	1.55	3	4.2861	17.426	34	3.6	25.551	0.236	22.04	5.186	22.76
TM10	Maktau	large	active	A	Oct_16	11	0	1.55	3	4.2861	17.426	34	3.6	25.559	0.189	22.85	4.977	22.04
TM10	Maktau	large	active	A	Oct_16	12	0	1.55	3	4.2861	17.426	34	3.6	25.387	0.342	21.69	5.395	22.85
TM10	Maktau	large	active	A	Oct_16	13	0	1.55	3	4.2861	17.426	34	3.6	24.66	0.431	22.1	5.972	21.69
TM10	Maktau	large	active	A	Oct_16	14	0	1.55	3	4.2861	17.426	34	3.6	24.556	0.211	22.17	5.112	22.1
TM10	Maktau	large	active	A	Oct_16	15	0	1.55	3	4.2861	17.426	34	3.6	24.527	0.272	22.28	5.402	22.17
TM10	Maktau	large	active	A	Oct_16	16	0	1.55	3	4.2861	17.426	34	3.6	24.579	0.224	21.86	5.799	22.28
TM10	Maktau	large	active	A	Oct_16	17	0	1.55	3	4.2861	17.426	34	3.6	24.527	0.289	21.99	6.012	21.86
TM10	Maktau	large	active	A	Oct_16	18	0	1.55	3	4.2861	17.426	34	3.6	24.574	0.25	22.41	5.204	21.99
TM10	Maktau	large	active	A	Oct_16	19	0	1.55	3	4.2861	17.426	34	3.6	24.645	0.215	21.89	4.71	22.41
TM10	Maktau	large	active	A	Oct_16	20	0	1.55	3	4.2861	17.426	34	3.6	24.377	0.279	21.94	5.195	21.89
TM10	Maktau	large	active	A	Oct_16	21	0	1.55	3	4.2861	17.426	34	3.6	24.353	0.288	21.74	5.275	21.94
TM10	Maktau	large	active	A	Oct_16	22	0	1.55	3	4.2861	17.426	34	3.6	24.082	0.345	22.26	5.941	21.74
TM10	Maktau	large	active	A	Oct_16	23	0	1.55	3	4.2861	17.426	34	3.6	24.234	0.192	23	5.736	22.26
TM10	Maktau	large	active	A	Oct_16	24	0	1.55	3	4.2861	17.426	34	3.6	24.543	0.171	21.97	5.13	23
TM10	Maktau	large	active	A	Oct_16	25	0	1.55	3	4.2861	17.426	34	3.6	24.77	0.226	21.95	5.259	21.97
TM10	Maktau	large	active	A	Oct_16	26	0	1.55	3	4.2861	17.426	34	3.6	25.384	0.174	23.06	4.374	21.95
TM10	Maktau	large	active	A	Oct_16	27	0	1.55	3	4.2861	17.426	34	3.6	25.426	0.168	22.66	4.536	23.06
TM10	Maktau	large	active	A	Oct_16	28	0	1.55	3	4.2861	17.426	34	3.6	25.306	0.264	22.7	5.008	22.66
TM10	Maktau	large	active	A	Oct_16	29	0	1.55	3	4.2861	17.426	34	3.6	25.197	0.226	23.02	6.429	22.7
TM10	Maktau	large	active	A	Oct_16	30	0	1.55	3	4.2861	17.426	34	3.6	25.434	0.152	24.17	5.087	23.02
TM10	Maktau	large	active	A	Oct_16	31	0	1.55	3	4.2861	17.426	34	3.6	25.848	0.156	24.36	4.902	24.17
TM10	Maktau	large	active	A	Nov_16	1	0	1.55	3	4.2861	17.426	34	3.6	26.166	0.183	24.13	4.124	24.36
TM10	Maktau	large	active	A	Nov_16	2	0	1.55	3	4.2861	17.426	34	3.6	26.181	0.302	23.35	4.108	24.13
TM10	Maktau	large	active	A	Nov_16	3	0	1.55	3	4.2861	17.426	34	3.6	26.426	0.125	23.41	4.684	23.35
TM10	Maktau	large	active	A	Nov_16	4	0	1.55	3	4.2861	17.426	34	3.6	26.208	0.262	22.95	4.376	23.41
TM10	Maktau	large	active	A	Nov_16	5	0	1.55	3	4.2861	17.426	34	3.6	25.674	0.244	22.84	4.454	22.95
TM10	Maktau	large	active	A	Nov_16	6	0	1.55	3	4.2861	17.426	34	3.6	25.273	0.147	23.31	4.79	22.84
TM10	Maktau	large	active	A	Nov_16	7	0	1.55	3	4.2861	17.426	34	3.6	25.134	0.326	22.69	5.299	23.31
TM10	Maktau	large	active	A	Nov_16	8	0	1.55	3	4.2861	17.426	34	3.6	25.373	0.266	23.49	4.936	22.69
TM10	Maktau	large	active	A	Nov_16	9	0	1.55	3	4.2861	17.426	34	3.6	25.884	0.335	23.73	4.532	23.49
TM10	Maktau	large	active	A	Nov_16	10	0	1.55	3	4.2861	17.426	34	3.6	26.072	0.168	23.77	4.197	23.73
TM10	Maktau	large	active	A	Nov_16	11	0	1.55	3	4.2861	17.426	34	3.6	26.157	0.32	23.79	4.256	23.77
TM10	Maktau	large	active	A	Nov_16	12	0	1.55	3	4.2861	17.426	34	3.6	25.798	0.538	22.45	3.164	23.79
TM10	Maktau	large	active	A	Nov_16	13	0	1.55	3	4.2861	17.426	34	3.6	24.947	0.357	23.28	4.056	22.45
TM10	Maktau	large	active	A	Nov_16	14	0	1.55	3	4.2861	17.426	34	3.6	24.71	0.482	23.59	3.809	23.28
TM10	Maktau	large	active	A	Nov_16	15	0	1.55	3	4.2861	17.426	34	3.6	24.79	0.392	22.73	4.305	23.59
TM10	Maktau	large	active	A	Nov_16	16	0	1.55	3	4.2861	17.426	34	3.6	25.33	0.242	22.56	3.387	22.73
TM10	Maktau	large	active	A	Nov_16	17	0	1.55	3	4.2861	17.426	34	3.6	25.197	0.263	23.32	4.179	22.56
TM10	Maktau	large	active	A	Nov_16	18	0	1.55	3	4.2861	17.426	34	3.6	25.226	0.216	24.51	4.338	23.32
TM10	Maktau	large	active	A	Nov_16	19	0	1.55	3	4.2861	17.426	34	3.6	25.832	0.079	22.78	3.494	24.51
TM10	Maktau	large	active	A	Nov_16	20	0	1.55	3	4.2861	17.426	34	3.6	25.97	0.309	23.45	3.819	22.78
TM10	Maktau	large	active	A	Nov_16	21	0	1.55	3	4.2861	17.426	34	3.6	25.876	0.376	23.29	4.153	23.45
TM10	Maktau	large	active	A	Nov_16	22	0	1.55	3	4.2861	17.426	34	3.6	25.32	0.187	23.79	4.859	23.29
TM10	Maktau	large	active	A	Nov_16	23	0	1.55	3	4.2861	17.426	34	3.6	25.273	0.136	23.19	5.088	23.79
TM10	Maktau	large	active	A	Nov_16	24	0	1.55	3	4.2861	17.426	34	3.6	25.442	0.119	23.63	5.255	23.19
TM10	Maktau	large	active	A	Nov_16	25	0	1.55	3	4.2861	17.426	34	3.6	25.402	0.211	23.41	4.824	23.63
TM10	Maktau	large	active	A	Nov_16	26	0	1.55	3	4.2861	17.426	34	3.6	25.374	0.194	23.89	4.469	23.41
TM10	Maktau	large	active	A	Nov_16	27	0	1.55	3	4.2861	17.426	34	3.6	25.473	0.14	23.2	4.237	23.89
TM10	Maktau	large	active	A	Nov_16	28	0	1.55	3	4.2861	17.426	34	3.6	25.699	0.077	21.56	2.292	23.2
TM10	Maktau	large	active	A	Nov_16	29	0	1.55	3	4.2861	17.426	34	3.6	25.312	0.19	22.58	2.621	21.56
TM10	Maktau	large	active	A	Nov_16	30	0	1.55	3	4.2861	17.426	34	3.6	24.846	0.346	22.82	3.282	22.58
TM10	Maktau	large	active	A	Dec_16	1	0	1.55	3	4.2861	17.426	34	3.6	23.946	0.475	22.82	3.358	22.82
TM10	Maktau	large	active	A	Dec_16	2	0	1.55	3	4.2861	17.426	34	3.6	23.558	0.244	23.81	3.698	22.82
TM10	Maktau	large	active	A	Dec_16	3	0	1.55	3	4.2861	17.426	34	3.6	23.858	0.383	22.81	2.969	23.81
TM10	Maktau	large	active	A	Dec_16	4	0	1.55	3	4.2861	17.426	34	3.6	23.317	0.199	22.93	3.338	22.81
TM10	Maktau	large	active	A	Dec_16	5	0	1.55	3	4.2861	17.426	34	3.6	23.24	0.277	23.43	3.859	22.93
TM10	Maktau	large	active	A	Dec_16	6	0	1.55	3	4.2861	17.426	34	3.6	22.895	0.311	23.18	4.065	23.43
TM10	Maktau	large	active	A	Dec_16	7	0	1.55	3	4.2861	17.426	34	3.6	23.138	0.268	23.37	3.623	23.18
TM10	Maktau	large	active	A	Dec_16	8	0	1.55	3	4.2861	17.426	34	3.6	24.032	0.302	22.64	3.964	23.37
TM10	Maktau	large	active	A	Dec_16	9	0	1.55	3	4.2861	17.426	34	3.6	24.449	0.14	23.48	3.975	22.64
TM10	Maktau	large	active	A	Dec_16	10	0	1.55	3	4.2861	17.426	34	3.6	24.969	0.127	22.46	4.075	23.48
TM10	Maktau	large	active	A	Dec_16	11	0	1.55	3	4.2861	17.426	34	3.6	24.665	0.451	22.44	3.241	22.46
TM10	Maktau	large	active	A	Dec_16	12	0	1.55	3	4.2861	17.426	34	3.6	24.543	0.185	22.83	3.515	22.44
TM10	Maktau	large	active	A	Dec_16	13	0	1.55	3	4.2861	17.426	34	3.6	23.98	0.413	22.54	3.578	22.83
TM10	Maktau	large	active	A	Dec_16	14	0	1.55	3	4.2861	17.426	34	3.6	23.503	0.265	22.78	3.582	22.54
TM10	Maktau	large	active	A	Dec_16	15	0	1.55	3	4.2861	17.426	34	3.6	23.122	0.319	23.17	4.341	22.78
TM10	Maktau	large	active	A	Dec_16	16	0	1.55	3	4.2861	17.426	34	3.6	23.752	0.281	23.79	4.682	23.17
TM10	Maktau	large	active	A	Dec_16	17	0	1.55	3	4.2861	17.426	34	3.6	24.488	0.202	24.28	4.57	23.79
TM10	Maktau	large	active	A	Dec_16	18	0	1.55	3	4.2861	17.426	34	3.6	24.598	0.25	24.13	3.967	24.28
TM10	Maktau	large	active	A	Dec_16	19	0	1.55	3	4.2861	17.426	34	3.6	24.121	0.38	23.88	4.031	24.13
TM10	Maktau	large	active	A	Dec_16	20	0	1.55	3	4.2861	17.426	34	3.6	23.938	0.432	24.53	4.221	23.88
TM10	Maktau	large	active	A	Dec_16	21	0	1.55	3	4.2861	17.426	34	3.6	24.189	0.248	23.88	3.873	24.53
TM10	Maktau	large	active	A	Dec_16	22	0	1.55	3	4.2861	17.426	34	3.6	24.314	0.271	23.83	3.954	23.88
TM10	Maktau	large	active	A	Dec_16	23	0	1.55	3	4.2861	17.426	34	3.6	23.728	0.469	23.25	4.482	23.83
TM10	Maktau	large	active	A	Dec_16	24	0	1.55	3	4.2861	17.426	34	3.6	23.287	0.333	23.24	3.609	23.25
TM10	Maktau	large	active	A	Dec_16	25	0	1.55	3	4.2861	17.426	34	3.6	23.227	0.337	23.73	4.414	23.24
TM10	Maktau	large	active	A	Dec_16	26	0	1.55	3	4.2861	17.426	34	3.6	23.777	0.263	24.32	4.019	23.73
TM10	Maktau	large	active	A	Dec_16	27	0	1.55	3	4.2861	17.426	34	3.6	24.121	0.242	24.3	4.135	24.32
TM10	Maktau	large	active	A	Dec_16	28	0	1.55	3	4.2861	17.426	34	3.6	24.527	0.202	24.37	5.312	24.3
TM10	Maktau	large	active	A	Dec_16	29	0	1.55	3	4.2861	17.426	34	3.6	25.351	0.211	23.05	4.643	24.37
TM10	Maktau	large	active	A	Dec_16	30	0	1.55	3	4.2861	17.426	34	3.6	25.613	0.179	22.59	2.783	23.05
TM10	Maktau	large	active	A	Dec_16	31	0	1.55	3	4.2861	17.426	34	3.6	25.135	0.238	23.45	3.575	22.59
TM10	Maktau	large	active	A	Jan_17	1	0	1.55	3	4.2861	17.426	34	3.6	24.658	0.518	22.7	3.169	23.45
TM10	Maktau	large	active	A	Jan_17	2	0	1.55	3	4.2861	17.426	34	3.6	24.233	0.397	24.15	4.251	22.7
TM10	Maktau	large	active	A	Jan_17	3	0	1.55	3	4.2861	17.426	34	3.6	23.9	0.358	24.22	4.063	24.15
TM10	Maktau	large	active	A	Jan_17	4	0	1.55	3	4.2861	17.426	34	3.6	23.991	0.366	23.97	4.114	24.22
TM10	Maktau	large	active	A	Jan_17	5	0	1.55	3	4.2861	17.426	34	3.6	23.852	0.467	23.66	4.371	23.97
TM10	Maktau	large	active	A	Jan_17	6	0	1.55	3	4.2861	17.426	34	3.6	23.978	0.273	23.87	4.556	23.66
TM10	Maktau	large	active	A	Jan_17	7	0	1.55	3	4.2861	17.426	34	3.6	23.916	0.37	24.76	5.18	23.87
TM10	Maktau	large	active	A	Jan_17	8	0	1.55	3	4.2861	17.426	34	3.6	24.515	0.284	25.61	4.724	24.76
TM10	Maktau	large	active	A	Jan_17	9	0	1.55	3	4.2861	17.426	34	3.6	25.087	0.331	24.83	3.582	25.61
TM10	Maktau	large	active	A	Jan_17	10	0	1.55	3	4.2861	17.426	34	3.6	24.957	0.343	23.45	3.675	24.83
TM10	Maktau	large	active	A	Jan_17	11	0	1.55	3	4.2861	17.426	34	3.6	23.931	0.545	23.12	4.144	23.45
TM10	Maktau	large	active	A	Jan_17	12	0	1.55	3	4.2861	17.426	34	3.6	23.035	0.489	23.68	4.889	23.12
TM10	Maktau	large	active	A	Jan_17	13	0	1.55	3	4.2861	17.426	34	3.6	23.192	0.345	24.29	5.014	23.68
TM10	Maktau	large	active	A	Jan_17	14	0	1.55	3	4.2861	17.426	34	3.6	23.552	0.551	25.13	5.111	24.29
TM10	Maktau	large	active	A	Jan_17	15	0	1.55	3	4.2861	17.426	34	3.6	24.283	0.336	24.91	4.904	25.13
TM10	Maktau	large	active	A	Jan_17	16	0	1.55	3	4.2861	17.426	34	3.6	24.819	0.576	23.59	4.84	24.91
TM10	Maktau	large	active	A	Jan_17	17	0	1.55	3	4.2861	17.426	34	3.6	24.554	0.286	23.43	4.614	23.59
TM10	Maktau	large	active	A	Jan_17	18	0	1.55	3	4.2861	17.426	34	3.6	24.26	0.286	24.41	4.222	23.43
TM10	Maktau	large	active	A	Jan_17	19	0	1.55	3	4.2861	17.426	34	3.6	24.546	0.235	25.34	4.844	24.41
TM10	Maktau	large	active	A	Jan_17	20	0	1.55	3	4.2861	17.426	34	3.6	24.711	0.332	24.74	5.107	25.34
TM10	Maktau	large	active	A	Jan_17	21	0	1.55	3	4.2861	17.426	34	3.6	25.119	0.204	24.58	4.469	24.74
TM10	Maktau	large	active	A	Jan_17	22	0	1.55	3	4.2861	17.426	34	3.6	25.275	0.26	24.22	4.147	24.58
TM10	Maktau	large	active	A	Jan_17	23	0	1.55	3	4.2861	17.426	34	3.6	25.079	0.352	23.75	4.432	24.22
TM10	Maktau	large	active	A	Jan_17	24	0	1.55	3	4.2861	17.426	34	3.6	24.785	0.406	24.81	5.889	23.75
TM10	Maktau	large	active	A	Jan_17	25	0	1.55	3	4.2861	17.426	34	3.6	25.009	0.413	25.34	5.163	24.81
TM10	Maktau	large	active	A	Jan_17	26	0	1.55	3	4.2861	17.426	34	3.6	25.309	0.339	24.67	5.171	25.34
TM10	Maktau	large	active	A	Jan_17	27	0	1.55	3	4.2861	17.426	34	3.6	25.52	0.255	25.4	4.423	24.67
TM10	Maktau	large	active	A	Jan_17	28	0	1.55	3	4.2861	17.426	34	3.6	25.779	0.31	25.03	4.238	25.4
TM10	Maktau	large	active	A	Jan_17	29	0	1.55	3	4.2861	17.426	34	3.6	25.775	0.431	25.55	4.544	25.03
TM10	Maktau	large	active	A	Jan_17	30	0	1.55	3	4.2861	17.426	34	3.6	26.09	0.251	25.94	4.631	25.55
TM10	Maktau	large	active	A	Jan_17	31	0	1.55	3	4.2861	17.426	34	3.6	26.527	0.176	23.51	2.629	25.94
TM10	Maktau	large	active	A	Feb_17	1	0	1.55	3	4.2861	17.426	34	3.6	25.799	0.39	24.51	4.589	23.51
TM10	Maktau	large	active	A	Feb_17	2	0	1.55	3	4.2861	17.426	34	3.6	25.637	0.276	24.78	4.552	24.51
TM10	Maktau	large	active	A	Feb_17	3	0	1.55	3	4.2861	17.426	34	3.6	25.463	0.33	25.57	5.118	24.78
TM10	Maktau	large	active	A	Feb_17	4	0	1.55	3	4.2861	17.426	34	3.6	25.754	0.247	25.05	4.39	25.57
TM10	Maktau	large	active	A	Feb_17	5	0	1.55	3	4.2861	17.426	34	3.6	25.471	0.57	23.96	4.514	25.05
TM10	Maktau	large	active	A	Feb_17	6	0	1.55	3	4.2861	17.426	34	3.6	25.148	0.415	23.33	4.289	23.96
TM10	Maktau	large	active	A	Feb_17	7	0	1.55	3	4.2861	17.426	34	3.6	24.931	0.389	24.18	4.204	23.33
TM10	Maktau	large	active	A	Feb_17	8	0	1.55	3	4.2861	17.426	34	3.6	24.762	0.331	23.83	3.981	24.18
TM10	Maktau	large	active	A	Feb_17	9	0	1.55	3	4.2861	17.426	34	3.6	24.499	0.431	24	4.148	23.83
TM10	Maktau	large	active	A	Feb_17	10	0	1.55	3	4.2861	17.426	34	3.6	24.176	0.335	23.5	3.595	24
TM10	Maktau	large	active	A	Feb_17	11	0	1.55	3	4.2861	17.426	34	3.6	23.939	0.298	23.6	4.798	23.5
TM10	Maktau	large	active	A	Feb_17	12	0	1.55	3	4.2861	17.426	34	3.6	24.345	0.346	23.83	6.749	23.6
TM10	Maktau	large	active	A	Feb_17	13	0	1.55	3	4.2861	17.426	34	3.6	25.182	0.225	24.34	5.381	23.83
TM10	Maktau	large	active	A	Feb_17	14	0	1.55	3	4.2861	17.426	34	3.6	25.932	0.19	24.5	4.38	24.34
TM10	Maktau	large	active	A	Feb_17	15	0	1.55	3	4.2861	17.426	34	3.6	26.074	0.319	24.53	5.16	24.5
TM10	Maktau	large	active	A	Feb_17	16	0	1.55	3	4.2861	17.426	34	3.6	25.947	0.393	24.03	5.625	24.53
TM10	Maktau	large	active	A	Feb_17	17	0	1.55	3	4.2861	17.426	34	3.6	26.15	0.234	25.01	5.63	24.03
TM10	Maktau	large	active	A	Feb_17	18	0	1.55	3	4.2861	17.426	34	3.6	27.024	0.317	24.93	4.821	25.01
TM10	Maktau	large	active	A	Feb_17	19	0	1.55	3	4.2861	17.426	34	3.6	27.259	0.292	24.45	4.714	24.93
TM10	Maktau	large	active	A	Feb_17	20	0	1.55	3	4.2861	17.426	34	3.6	26.363	0.701	23.58	3.719	24.45
TM10	Maktau	large	active	A	Feb_17	21	0	1.55	3	4.2861	17.426	34	3.6	25.04	0.646	24.54	4.684	23.58
TM10	Maktau	large	active	A	Feb_17	22	0	1.55	3	4.2861	17.426	34	3.6	25.652	0.277	24.03	3.938	24.54
TM10	Maktau	large	active	A	Feb_17	23	0	1.55	3	4.2861	17.426	34	3.6	25.915	0.415	25.26	3.907	24.03
TM10	Maktau	large	active	A	Feb_17	24	0	1.55	3	4.2861	17.426	34	3.6	26.54	0.482	25.35	4.045	25.26
TM10	Maktau	large	active	A	Feb_17	25	0	1.55	3	4.2861	17.426	34	3.6	26.72	0.352	25.01	4.77	25.35
TM10	Maktau	large	active	A	Feb_17	26	0	1.55	3	4.2861	17.426	34	3.6	26.361	0.352	24.8	5.238	25.01
TM10	Maktau	large	active	A	Feb_17	27	0	1.55	3	4.2861	17.426	34	3.6	26.665	0.425	25.25	4.481	24.8
TM10	Maktau	large	active	A	Feb_17	28	0	1.55	3	4.2861	17.426	34	3.6	27.047	0.22	24.96	4.359	25.25
TM10	Maktau	large	active	A	Mar_17	1	0	1.55	3	4.2861	17.426	34	3.6	26.691	0.343	24.36	3.972	24.96
TM10	Maktau	large	active	A	Mar_17	2	0	1.55	3	4.2861	17.426	34	3.6	26.523	0.254	23.97	5.604	24.36
TM10	Maktau	large	active	A	Mar_17	3	0	1.55	3	4.2861	17.426	34	3.6	27.496	0.298	24.76	5.374	23.97
TM10	Maktau	large	active	A	Mar_17	4	0	1.55	3	4.2861	17.426	34	3.6	28.347	0.181	23.35	3.669	24.76
TM10	Maktau	large	active	A	Mar_17	5	0	1.55	3	4.2861	17.426	34	3.6	28.113	0.471	25.59	5.689	23.35
TM10	Maktau	large	active	A	Mar_17	6	0	1.55	3	4.2861	17.426	34	3.6	28.597	0.244	26.55	5.668	25.59
TM10	Maktau	large	active	A	Mar_17	7	0	1.55	3	4.2861	17.426	34	3.6	29.424	0.207	27.22	5.503	26.55
TM10	Maktau	large	active	A	Mar_17	8	0	1.55	3	4.2861	17.426	34	3.6	29.73	0.496	25.83	5.799	27.22
TM10	Maktau	large	active	A	Mar_17	9	0	1.55	3	4.2861	17.426	34	3.6	29.4	0.187	25.9	5.733	25.83
TM10	Maktau	large	active	A	Mar_17	10	0	1.55	3	4.2861	17.426	34	3.6	29.973	0.347	26.86	5.059	25.9
TM10	Maktau	large	active	A	Mar_17	11	0	1.55	3	4.2861	17.426	34	3.6	29.799	0.436	25.19	4.89	26.86
TM10	Maktau	large	active	A	Mar_17	12	0	1.55	3	4.2861	17.426	34	3.6	29.06	0.303	24.26	4.622	25.19
TM10	Maktau	large	active	A	Mar_17	13	0	1.55	3	4.2861	17.426	34	3.6	28.764	0.273	25.68	6.043	24.26
TM10	Maktau	large	active	A	Mar_17	14	0	1.55	3	4.2861	17.426	34	3.6	29.643	0.122	25.12	4.842	25.68
TM10	Maktau	large	active	A	Mar_17	15	0	1.55	3	4.2861	17.426	34	3.6	30.138	0.457	25.65	4.516	25.12
TM10	Maktau	large	active	A	Mar_17	16	0	1.55	3	4.2861	17.426	34	3.6	30.419	0.285	25.46	5.104	25.65
TM10	Maktau	large	active	A	Mar_17	17	0	1.55	3	4.2861	17.426	34	3.6	30.421	0.199	24.56	5.413	25.46
TM10	Maktau	large	active	A	Mar_17	18	0	1.55	3	4.2861	17.426	34	3.6	29.268	0.481	22.52	3.232	24.56
TM10	Maktau	large	active	A	Mar_17	19	0	1.55	3	4.2861	17.426	34	3.6	28.417	0.303	24.42	3.989	22.52
TM10	Maktau	large	active	A	Mar_17	20	0	1.55	3	4.2861	17.426	34	3.6	27.906	0.257	24.3	4.401	24.42
TM10	Maktau	large	active	A	Mar_17	21	0	1.55	3	4.2861	17.426	34	3.6	28.44	0.151	25	3.975	24.3
TM10	Maktau	large	active	A	Mar_17	22	0	1.55	3	4.2861	17.426	34	3.6	28.979	0.311	24.64	4.032	25
TM10	Maktau	large	active	A	Mar_17	23	0	1.55	3	4.2861	17.426	34	3.6	28.748	0.32	23.77	3.977	24.64
TM10	Maktau	large	active	A	Mar_17	24	0	1.55	3	4.2861	17.426	34	3.6	28.425	0.182	24.56	4.218	23.77
TM10	Maktau	large	active	A	Mar_17	25	0	1.55	3	4.2861	17.426	34	3.6	28.706	0.127	25.85	4.456	24.56
TM10	Maktau	large	active	A	Mar_17	26	0	1.55	3	4.2861	17.426	34	3.6	29.244	0.06	25.72	4.243	25.85
TM10	Maktau	large	active	A	Mar_17	27	0	1.55	3	4.2861	17.426	34	3.6	29.303	0.178	24.35	3.353	25.72
TM10	Maktau	large	active	A	Mar_17	28	0	1.55	3	4.2861	17.426	34	3.6	28.768	0.306	24.22	3.828	24.35
TM10	Maktau	large	active	A	Mar_17	29	0	1.55	3	4.2861	17.426	34	3.6	28.265	0.358	22.55	3.838	24.22
TM10	Maktau	large	active	A	Mar_17	30	0	1.55	3	4.2861	17.426	34	3.6	28.12	0.218	24.15	4.364	22.55
TM10	Maktau	large	active	A	Mar_17	31	0	1.55	3	4.2861	17.426	34	3.6	28.319	0.218	24.02	4.141	24.15
TM14	Maktau	large	active	A	Mar_16	1	0.67	1.2	3.3	4.4585	18.0419	25	3.6	28.345	0.12	23.43	3.973	22.89
TM14	Maktau	large	active	A	Mar_16	2	0.67	1.2	3.3	4.4585	18.0419	25	3.6	28.556	0.15	24.92	5.164	23.43
TM14	Maktau	large	active	A	Mar_16	3	0.67	1.2	3.3	4.4585	18.0419	25	3.6	28.947	0.251	24.8	3.991	24.92
TM14	Maktau	large	active	A	Mar_16	4	0.67	1.2	3.3	4.4585	18.0419	25	3.6	28.97	0.243	25.01	4.385	24.8
TM14	Maktau	large	active	A	Mar_16	5	0.67	1.2	3.3	4.4585	18.0419	25	3.6	28.907	0.205	24.28	5.121	25.01
TM14	Maktau	large	active	A	Mar_16	6	0.67	1.2	3.3	4.4585	18.0419	25	3.6	28.814	0.29	25.24	5.036	24.28
TM14	Maktau	large	active	A	Mar_16	7	0.67	1.2	3.3	4.4585	18.0419	25	3.6	29.306	0.16	25.41	4.452	25.24
TM14	Maktau	large	active	A	Mar_16	8	0.67	1.2	3.3	4.4585	18.0419	25	3.6	29.657	0.125	25.67	5.154	25.41
TM14	Maktau	large	active	A	Mar_16	9	0.67	1.2	3.3	4.4585	18.0419	25	3.6	29.649	0.195	24.48	3.963	25.67
TM14	Maktau	large	active	A	Mar_16	10	0.67	1.2	3.3	4.4585	18.0419	25	3.6	29.04	0.261	22.8	4.435	24.48
TM14	Maktau	large	active	A	Mar_16	11	0.67	1.2	3.3	4.4585	18.0419	25	3.6	28.626	0.151	25.63	4.472	22.8
TM14	Maktau	large	active	A	Mar_16	12	0.67	1.2	3.3	4.4585	18.0419	25	3.6	28.72	0.062	25.95	4.289	25.63
TM14	Maktau	large	active	A	Mar_16	13	0.67	1.2	3.3	4.4585	18.0419	25	3.6	28.681	0.117	24.95	6.024	25.95
TM14	Maktau	large	active	A	Mar_16	14	0.67	1.2	3.3	4.4585	18.0419	25	3.6	29.104	0.274	25.95	4.829	24.95
TM14	Maktau	large	active	A	Mar_16	15	0.67	1.2	3.3	4.4585	18.0419	25	3.6	29.432	0.13	25.48	5.016	25.95
TM14	Maktau	large	active	A	Mar_16	16	0.67	1.2	3.3	4.4585	18.0419	25	3.6	29.048	0.11	25.93	5.507	25.48
TM14	Maktau	large	active	A	Mar_16	17	0.67	1.2	3.3	4.4585	18.0419	25	3.6	29.54	0.139	25.44	4.363	25.93
TM14	Maktau	large	active	A	Mar_16	18	0.67	1.2	3.3	4.4585	18.0419	25	3.6	30.179	0.236	26.16	3.938	25.44
TM14	Maktau	large	active	A	Mar_16	19	0.67	1.2	3.3	4.4585	18.0419	25	3.6	29.883	0.233	25.19	4.529	26.16
TM14	Maktau	large	active	A	Mar_16	20	0.67	1.2	3.3	4.4585	18.0419	25	3.6	29.681	0.159	26.1	4.998	25.19
TM14	Maktau	large	active	A	Mar_16	21	0.67	1.2	3.3	4.4585	18.0419	25	3.6	29.704	0.165	26.15	4.351	26.1
TM14	Maktau	large	active	A	Mar_16	22	0.67	1.2	3.3	4.4585	18.0419	25	3.6	29.368	0.227	26.29	4.692	26.15
TM14	Maktau	large	active	A	Mar_16	23	0.67	1.2	3.3	4.4585	18.0419	25	3.6	29.22	0.083	26.48	4.831	26.29
TM14	Maktau	large	active	A	Mar_16	24	0.67	1.2	3.3	4.4585	18.0419	25	3.6	29.127	0.265	26.21	5.129	26.48
TM14	Maktau	large	active	A	Mar_16	25	0.67	1.2	3.3	4.4585	18.0419	25	3.6	28.743	0.346	24.12	4.279	26.21
TM14	Maktau	large	active	A	Mar_16	26	0.67	1.2	3.3	4.4585	18.0419	25	3.6	28.017	0.272	24.51	4.704	24.12
TM14	Maktau	large	active	A	Mar_16	27	0.67	1.2	3.3	4.4585	18.0419	25	3.6	28.158	0.226	25.63	5.669	24.51
TM14	Maktau	large	active	A	Mar_16	28	0.67	1.2	3.3	4.4585	18.0419	25	3.6	28.751	0.194	27.04	5.613	25.63
TM14	Maktau	large	active	A	Mar_16	29	0.67	1.2	3.3	4.4585	18.0419	25	3.6	29.548	0.101	26.84	4.98	27.04
TM14	Maktau	large	active	A	Mar_16	30	0.67	1.2	3.3	4.4585	18.0419	25	3.6	29.907	0.043	26.75	4.903	26.84
TM14	Maktau	large	active	A	Mar_16	31	0.67	1.2	3.3	4.4585	18.0419	25	3.6	30.187	0.226	26.8	4.922	26.75
TM14	Maktau	large	active	A	Apr_16	1	0.67	1.2	3.3	4.4585	18.0419	25	3.6	30.102	0.155	23.6	1.852	26.8
TM14	Maktau	large	active	A	Apr_16	2	0.67	1.2	3.3	4.4585	18.0419	25	3.6	29.805	0.368	21.14	1.049	23.6
TM14	Maktau	large	active	A	Apr_16	3	0.67	1.2	3.3	4.4585	18.0419	25	3.6	28.619	0.309	22.39	2.419	21.14
TM14	Maktau	large	active	A	Apr_16	4	0.67	1.2	3.3	4.4585	18.0419	25	3.6	28.33	0.122	21.78	2.927	22.39
TM14	Maktau	large	active	A	Apr_16	5	0.67	1.2	3.3	4.4585	18.0419	25	3.6	27.697	0.197	21.91	2.777	21.78
TM14	Maktau	large	active	A	Apr_16	6	0.67	1.2	3.3	4.4585	18.0419	25	3.6	27.564	0.114	23.23	2.858	21.91
TM14	Maktau	large	active	A	Apr_16	7	0.67	1.2	3.3	4.4585	18.0419	25	3.6	27.458	0.162	23.14	4.322	23.23
TM14	Maktau	large	active	A	Apr_16	8	0.67	1.2	3.3	4.4585	18.0419	25	3.6	27.377	0.164	23.73	3.852	23.14
TM14	Maktau	large	active	A	Apr_16	9	0.67	1.2	3.3	4.4585	18.0419	25	3.6	27.72	0.103	22.65	3.831	23.73
TM14	Maktau	large	active	A	Apr_16	10	0.67	1.2	3.3	4.4585	18.0419	25	3.6	27.705	0.112	22.79	3.38	22.65
TM14	Maktau	large	active	A	Apr_16	11	0.67	1.2	3.3	4.4585	18.0419	25	3.6	27.681	0.136	22.33	2.8	22.79
TM14	Maktau	large	active	A	Apr_16	12	0.67	1.2	3.3	4.4585	18.0419	25	3.6	27.353	0.112	22.84	3.418	22.33
TM14	Maktau	large	active	A	Apr_16	13	0.67	1.2	3.3	4.4585	18.0419	25	3.6	27.353	0.124	22.43	2.799	22.84
TM14	Maktau	large	active	A	Apr_16	14	0.67	1.2	3.3	4.4585	18.0419	25	3.6	27.168	0.214	22.41	2.834	22.43
TM14	Maktau	large	active	A	Apr_16	15	0.67	1.2	3.3	4.4585	18.0419	25	3.6	26.674	0.155	22.64	2.81	22.41
TM14	Maktau	large	active	A	Apr_16	16	0.67	1.2	3.3	4.4585	18.0419	25	3.6	26.627	0.101	21.35	1.754	22.64
TM14	Maktau	large	active	A	Apr_16	17	0.67	1.2	3.3	4.4585	18.0419	25	3.6	26.322	0.107	22.26	2.866	21.35
TM14	Maktau	large	active	A	Apr_16	18	0.67	1.2	3.3	4.4585	18.0419	25	3.6	26.322	0.139	23.04	3.842	22.26
TM14	Maktau	large	active	A	Apr_16	19	0.67	1.2	3.3	4.4585	18.0419	25	3.6	26.871	0.34	24.12	3.978	23.04
TM14	Maktau	large	active	A	Apr_16	20	0.67	1.2	3.3	4.4585	18.0419	25	3.6	27.752	0.322	23.96	3.562	24.12
TM14	Maktau	large	active	A	Apr_16	21	0.67	1.2	3.3	4.4585	18.0419	25	3.6	28.119	0.206	22.69	2.73	23.96
TM14	Maktau	large	active	A	Apr_16	22	0.67	1.2	3.3	4.4585	18.0419	25	3.6	28.331	0.181	22.81	2.829	22.69
TM14	Maktau	large	active	A	Apr_16	23	0.67	1.2	3.3	4.4585	18.0419	25	3.6	28.205	0.172	23.57	2.962	22.81
TM14	Maktau	large	active	A	Apr_16	24	0.67	1.2	3.3	4.4585	18.0419	25	3.6	28.002	0.183	23.63	3.284	23.57
TM14	Maktau	large	active	A	Apr_16	25	0.67	1.2	3.3	4.4585	18.0419	25	3.6	27.392	0.309	22.84	2.93	23.63
TM14	Maktau	large	active	A	Apr_16	26	0.67	1.2	3.3	4.4585	18.0419	25	3.6	27.021	0.34	22.61	3.698	22.84
TM14	Maktau	large	active	A	Apr_16	27	0.67	1.2	3.3	4.4585	18.0419	25	3.6	27.051	0.217	22.2	3.34	22.61
TM14	Maktau	large	active	A	Apr_16	28	0.67	1.2	3.3	4.4585	18.0419	25	3.6	27.13	0.275	21.62	3.225	22.2
TM14	Maktau	large	active	A	Apr_16	29	0.67	1.2	3.3	4.4585	18.0419	25	3.6	27.177	0.258	21.67	2.683	21.62
TM14	Maktau	large	active	A	Apr_16	30	0.67	1.2	3.3	4.4585	18.0419	25	3.6	27.314	0.091	22.2	3.227	21.67
TM14	Maktau	large	active	A	May_16	1	0.67	1.2	3.3	4.4585	18.0419	25	3.6	27.424	0.127	22.71	3.999	22.2
TM14	Maktau	large	active	A	May_16	2	0.67	1.2	3.3	4.4585	18.0419	25	3.6	27.408	0.121	22.56	4.319	22.71
TM14	Maktau	large	active	A	May_16	3	0.67	1.2	3.3	4.4585	18.0419	25	3.6	27.377	0.164	22.82	4.201	22.56
TM14	Maktau	large	active	A	May_16	4	0.67	1.2	3.3	4.4585	18.0419	25	3.6	27.23	0.187	23.27	4.166	22.82
TM14	Maktau	large	active	A	May_16	5	0.67	1.2	3.3	4.4585	18.0419	25	3.6	27.525	0.044	21.78	1.996	23.27
TM14	Maktau	large	active	A	May_16	6	0.67	1.2	3.3	4.4585	18.0419	25	3.6	26.807	0.349	21.56	3.44	21.78
TM14	Maktau	large	active	A	May_16	7	0.67	1.2	3.3	4.4585	18.0419	25	3.6	25.908	0.236	21.09	4.205	21.56
TM14	Maktau	large	active	A	May_16	8	0.67	1.2	3.3	4.4585	18.0419	25	3.6	25.409	0.216	21.52	4.328	21.09
TM14	Maktau	large	active	A	May_16	9	0.67	1.2	3.3	4.4585	18.0419	25	3.6	25.357	0.191	20.94	4.019	21.52
TM14	Maktau	large	active	A	May_16	10	0.67	1.2	3.3	4.4585	18.0419	25	3.6	25.338	0.07	19.55	1.796	20.94
TM14	Maktau	large	active	A	May_16	11	0.67	1.2	3.3	4.4585	18.0419	25	3.6	25.049	0.131	20.98	3.553	19.55
TM14	Maktau	large	active	A	May_16	12	0.67	1.2	3.3	4.4585	18.0419	25	3.6	24.846	0.185	21.1	3.779	20.98
TM14	Maktau	large	active	A	May_16	13	0.67	1.2	3.3	4.4585	18.0419	25	3.6	25.385	0.146	20.84	3.716	21.1
TM14	Maktau	large	active	A	May_16	14	0.67	1.2	3.3	4.4585	18.0419	25	3.6	26.019	0.229	21.36	3.399	20.84
TM14	Maktau	large	active	A	May_16	15	0.67	1.2	3.3	4.4585	18.0419	25	3.6	25.971	0.128	22.06	4.524	21.36
TM14	Maktau	large	active	A	May_16	16	0.67	1.2	3.3	4.4585	18.0419	25	3.6	26.129	0.225	22.31	4.693	22.06
TM14	Maktau	large	active	A	May_16	17	0.67	1.2	3.3	4.4585	18.0419	25	3.6	26.526	0.156	23.02	4.253	22.31
TM14	Maktau	large	active	A	May_16	18	0.67	1.2	3.3	4.4585	18.0419	25	3.6	27.027	0.209	22.02	3.383	23.02
TM14	Maktau	large	active	A	May_16	19	0.67	1.2	3.3	4.4585	18.0419	25	3.6	26.643	0.205	21.05	3.703	22.02
TM14	Maktau	large	active	A	May_16	20	0.67	1.2	3.3	4.4585	18.0419	25	3.6	26.246	0.203	21.48	4.843	21.05
TM14	Maktau	large	active	A	May_16	21	0.67	1.2	3.3	4.4585	18.0419	25	3.6	26.247	0.201	19.67	1.985	21.48
TM14	Maktau	large	active	A	May_16	22	0.67	1.2	3.3	4.4585	18.0419	25	3.6	26.035	0.229	21.43	3.524	19.67
TM14	Maktau	large	active	A	May_16	23	0.67	1.2	3.3	4.4585	18.0419	25	3.6	26.051	0.236	20.1	2.993	21.43
TM14	Maktau	large	active	A	May_16	24	0.67	1.2	3.3	4.4585	18.0419	25	3.6	25.815	0.13	20.71	4.119	20.1
TM14	Maktau	large	active	A	May_16	25	0.67	1.2	3.3	4.4585	18.0419	25	3.6	25.822	0.135	21.31	4.309	20.71
TM14	Maktau	large	active	A	May_16	26	0.67	1.2	3.3	4.4585	18.0419	25	3.6	25.775	0.146	20.22	3.705	21.31
TM14	Maktau	large	active	A	May_16	27	0.67	1.2	3.3	4.4585	18.0419	25	3.6	25.369	0.193	20.55	4.209	20.22
TM14	Maktau	large	active	A	May_16	28	0.67	1.2	3.3	4.4585	18.0419	25	3.6	25.455	0.112	20.74	4.643	20.55
TM14	Maktau	large	active	A	May_16	29	0.67	1.2	3.3	4.4585	18.0419	25	3.6	25.713	0.117	20.84	4.949	20.74
TM14	Maktau	large	active	A	May_16	30	0.67	1.2	3.3	4.4585	18.0419	25	3.6	26.01	0.135	21.71	4.818	20.84
TM14	Maktau	large	active	A	May_16	31	0.67	1.2	3.3	4.4585	18.0419	25	3.6	26.479	0.124	22.43	4.546	21.71
TM14	Maktau	large	active	A	Jun_16	1	0.67	1.2	3.3	4.4585	18.0419	25	3.6	26.949	0.24	22.3	4.367	22.43
TM14	Maktau	large	active	A	Jun_16	2	0.67	1.2	3.3	4.4585	18.0419	25	3.6	27.097	0.194	22.38	4.012	22.3
TM14	Maktau	large	active	A	Jun_16	3	0.67	1.2	3.3	4.4585	18.0419	25	3.6	26.947	0.131	21	3.155	22.38
TM14	Maktau	large	active	A	Jun_16	4	0.67	1.2	3.3	4.4585	18.0419	25	3.6	26.799	0.127	21.84	4.093	21
TM14	Maktau	large	active	A	Jun_16	5	0.67	1.2	3.3	4.4585	18.0419	25	3.6	26.705	0.132	22.06	4.417	21.84
TM14	Maktau	large	active	A	Jun_16	6	0.67	1.2	3.3	4.4585	18.0419	25	3.6	26.658	0.129	21.82	4.116	22.06
TM14	Maktau	large	active	A	Jun_16	7	0.67	1.2	3.3	4.4585	18.0419	25	3.6	26.494	0.156	21.65	4.477	21.82
TM14	Maktau	large	active	A	Jun_16	8	0.67	1.2	3.3	4.4585	18.0419	25	3.6	26.373	0.172	21.01	4.912	21.65
TM14	Maktau	large	active	A	Jun_16	9	0.67	1.2	3.3	4.4585	18.0419	25	3.6	25.885	0.214	20.5	4.626	21.01
TM14	Maktau	large	active	A	Jun_16	10	0.67	1.2	3.3	4.4585	18.0419	25	3.6	25.572	0.171	20.66	4.506	20.5
TM14	Maktau	large	active	A	Jun_16	11	0.67	1.2	3.3	4.4585	18.0419	25	3.6	25.643	0.093	20.55	3.203	20.66
TM14	Maktau	large	active	A	Jun_16	12	0.67	1.2	3.3	4.4585	18.0419	25	3.6	25.697	0.087	20.93	3.098	20.55
TM14	Maktau	large	active	A	Jun_16	13	0.67	1.2	3.3	4.4585	18.0419	25	3.6	25.463	0.212	20.1	4.037	20.93
TM14	Maktau	large	active	A	Jun_16	14	0.67	1.2	3.3	4.4585	18.0419	25	3.6	24.965	0.337	20.63	5.877	20.1
TM14	Maktau	large	active	A	Jun_16	15	0.67	1.2	3.3	4.4585	18.0419	25	3.6	24.83	0.132	21.33	5.05	20.63
TM14	Maktau	large	active	A	Jun_16	16	0.67	1.2	3.3	4.4585	18.0419	25	3.6	25.299	0.115	21.26	4.16	21.33
TM14	Maktau	large	active	A	Jun_16	17	0.67	1.2	3.3	4.4585	18.0419	25	3.6	25.502	0.119	21.22	5.061	21.26
TM14	Maktau	large	active	A	Jun_16	18	0.67	1.2	3.3	4.4585	18.0419	25	3.6	25.924	0.11	21.57	3.731	21.22
TM14	Maktau	large	active	A	Jun_16	19	0.67	1.2	3.3	4.4585	18.0419	25	3.6	26.369	0.083	21.48	3.85	21.57
TM14	Maktau	large	active	A	Jun_16	20	0.67	1.2	3.3	4.4585	18.0419	25	3.6	26.612	0.066	20.84	3.191	21.48
TM14	Maktau	large	active	A	Jun_16	21	0.67	1.2	3.3	4.4585	18.0419	25	3.6	26.427	0.215	20.16	3.267	20.84
TM14	Maktau	large	active	A	Jun_16	22	0.67	1.2	3.3	4.4585	18.0419	25	3.6	25.926	0.287	19.21	1.849	20.16
TM14	Maktau	large	active	A	Jun_16	23	0.67	1.2	3.3	4.4585	18.0419	25	3.6	25.365	0.187	20.49	3.64	19.21
TM14	Maktau	large	active	A	Jun_16	24	0.67	1.2	3.3	4.4585	18.0419	25	3.6	25.051	0.226	19.56	3.248	20.49
TM14	Maktau	large	active	A	Jun_16	25	0.67	1.2	3.3	4.4585	18.0419	25	3.6	24.893	0.088	19.82	3.134	19.56
TM14	Maktau	large	active	A	Jun_16	26	0.67	1.2	3.3	4.4585	18.0419	25	3.6	24.775	0.088	20.5	3.501	19.82
TM14	Maktau	large	active	A	Jun_16	27	0.67	1.2	3.3	4.4585	18.0419	25	3.6	25.074	0.211	20.62	3.71	20.5
TM14	Maktau	large	active	A	Jun_16	28	0.67	1.2	3.3	4.4585	18.0419	25	3.6	25.334	0.161	20.83	4.843	20.62
TM14	Maktau	large	active	A	Jun_16	29	0.67	1.2	3.3	4.4585	18.0419	25	3.6	25.471	0.108	20.03	3.563	20.83
TM14	Maktau	large	active	A	Jun_16	30	0.67	1.2	3.3	4.4585	18.0419	25	3.6	25.424	0.123	20.15	4.417	20.03
TM14	Maktau	large	active	A	Jul_16	1	0.67	1.2	3.3	4.4585	18.0419	25	3.6	25.432	0.14	19.88	4.258	20.15
TM14	Maktau	large	active	A	Jul_16	2	0.67	1.2	3.3	4.4585	18.0419	25	3.6	25.815	0.066	20.31	3.403	19.88
TM14	Maktau	large	active	A	Jul_16	3	0.67	1.2	3.3	4.4585	18.0419	25	3.6	25.846	0.098	20.18	3.939	20.31
TM14	Maktau	large	active	A	Jul_16	4	0.67	1.2	3.3	4.4585	18.0419	25	3.6	25.427	0.18	19.89	5.514	20.18
TM14	Maktau	large	active	A	Jul_16	5	0.67	1.2	3.3	4.4585	18.0419	25	3.6	25.382	0.163	19.44	4.345	19.89
TM14	Maktau	large	active	A	Jul_16	6	0.67	1.2	3.3	4.4585	18.0419	25	3.6	25.137	0.21	19.06	3.391	19.44
TM14	Maktau	large	active	A	Jul_16	7	0.67	1.2	3.3	4.4585	18.0419	25	3.6	24.941	0.273	18.66	3.3	19.06
TM14	Maktau	large	active	A	Jul_16	8	0.67	1.2	3.3	4.4585	18.0419	25	3.6	24.432	0.159	18.39	3.012	18.66
TM14	Maktau	large	active	A	Jul_16	9	0.67	1.2	3.3	4.4585	18.0419	25	3.6	23.931	0.156	18.32	4.17	18.39
TM14	Maktau	large	active	A	Jul_16	10	0.67	1.2	3.3	4.4585	18.0419	25	3.6	23.908	0.264	18.63	3.257	18.32
TM14	Maktau	large	active	A	Jul_16	11	0.67	1.2	3.3	4.4585	18.0419	25	3.6	23.705	0.117	18.18	3.085	18.63
TM14	Maktau	large	active	A	Jul_16	12	0.67	1.2	3.3	4.4585	18.0419	25	3.6	23.587	0.146	17.61	2.89	18.18
TM14	Maktau	large	active	A	Jul_16	13	0.67	1.2	3.3	4.4585	18.0419	25	3.6	23.275	0.14	18.38	3.212	17.61
TM14	Maktau	large	active	A	Jul_16	14	0.67	1.2	3.3	4.4585	18.0419	25	3.6	23.322	0.128	18.88	4.681	18.38
TM14	Maktau	large	active	A	Jul_16	15	0.67	1.2	3.3	4.4585	18.0419	25	3.6	23.525	0.104	18.3	3.217	18.88
TM14	Maktau	large	active	A	Jul_16	16	0.67	1.2	3.3	4.4585	18.0419	25	3.6	23.681	0.094	19.4	3.132	18.3
TM14	Maktau	large	active	A	Jul_16	17	0.67	1.2	3.3	4.4585	18.0419	25	3.6	23.666	0.087	20.23	3.91	19.4
TM14	Maktau	large	active	A	Jul_16	18	0.67	1.2	3.3	4.4585	18.0419	25	3.6	23.853	0.102	19.11	3.37	20.23
TM14	Maktau	large	active	A	Jul_16	19	0.67	1.2	3.3	4.4585	18.0419	25	3.6	23.948	0.249	19.63	4.28	19.11
TM14	Maktau	large	active	A	Jul_16	20	0.67	1.2	3.3	4.4585	18.0419	25	3.6	23.971	0.272	19.55	5.141	19.63
TM14	Maktau	large	active	A	Jul_16	21	0.67	1.2	3.3	4.4585	18.0419	25	3.6	24.276	0.144	19.75	4.401	19.55
TM14	Maktau	large	active	A	Jul_16	22	0.67	1.2	3.3	4.4585	18.0419	25	3.6	24.549	0.105	20.45	4.583	19.75
TM14	Maktau	large	active	A	Jul_16	23	0.67	1.2	3.3	4.4585	18.0419	25	3.6	24.619	0.182	20.92	5.429	20.45
TM14	Maktau	large	active	A	Jul_16	24	0.67	1.2	3.3	4.4585	18.0419	25	3.6	24.916	0.116	20.37	4.875	20.92
TM14	Maktau	large	active	A	Jul_16	25	0.67	1.2	3.3	4.4585	18.0419	25	3.6	25.369	0.031	20.23	3.148	20.37
TM14	Maktau	large	active	A	Jul_16	26	0.67	1.2	3.3	4.4585	18.0419	25	3.6	25.324	0.138	20.24	4.69	20.23
TM14	Maktau	large	active	A	Jul_16	27	0.67	1.2	3.3	4.4585	18.0419	25	3.6	25.377	0.101	21.07	4.639	20.24
TM14	Maktau	large	active	A	Jul_16	28	0.67	1.2	3.3	4.4585	18.0419	25	3.6	25.494	0.162	20.13	4.646	21.07
TM14	Maktau	large	active	A	Jul_16	29	0.67	1.2	3.3	4.4585	18.0419	25	3.6	26.21	0.291	20.85	4.252	20.13
TM14	Maktau	large	active	A	Jul_16	30	0.67	1.2	3.3	4.4585	18.0419	25	3.6	25.994	0.214	20.44	5.177	20.85
TM14	Maktau	large	active	A	Jul_16	31	0.67	1.2	3.3	4.4585	18.0419	25	3.6	25.894	0.297	20.3	6.04	20.44
TM14	Maktau	large	active	A	Aug_16	1	0.67	1.2	3.3	4.4585	18.0419	25	3.6	25.408	0.274	20.1	4.903	20.3
TM14	Maktau	large	active	A	Aug_16	2	0.67	1.2	3.3	4.4585	18.0419	25	3.6	25.269	0.203	20.05	6.451	20.1
TM14	Maktau	large	active	A	Aug_16	3	0.67	1.2	3.3	4.4585	18.0419	25	3.6	25.388	0.185	20.26	5.908	20.05
TM14	Maktau	large	active	A	Aug_16	4	0.67	1.2	3.3	4.4585	18.0419	25	3.6	25.612	0.101	20.64	4.101	20.26
TM14	Maktau	large	active	A	Aug_16	5	0.67	1.2	3.3	4.4585	18.0419	25	3.6	25.596	0.225	18.55	3.409	20.64
TM14	Maktau	large	active	A	Aug_16	6	0.67	1.2	3.3	4.4585	18.0419	25	3.6	25.111	0.204	19.75	3.35	18.55
TM14	Maktau	large	active	A	Aug_16	7	0.67	1.2	3.3	4.4585	18.0419	25	3.6	24.808	0.326	19.21	3.765	19.75
TM14	Maktau	large	active	A	Aug_16	8	0.67	1.2	3.3	4.4585	18.0419	25	3.6	24.69	0.049	19.46	2.808	19.21
TM14	Maktau	large	active	A	Aug_16	9	0.67	1.2	3.3	4.4585	18.0419	25	3.6	24.604	0.132	18.49	1.881	19.46
TM14	Maktau	large	active	A	Aug_16	10	0.67	1.2	3.3	4.4585	18.0419	25	3.6	23.916	0.218	18.7	5.09	18.49
TM14	Maktau	large	active	A	Aug_16	11	0.67	1.2	3.3	4.4585	18.0419	25	3.6	24.269	0.272	19.6	4.064	18.7
TM14	Maktau	large	active	A	Aug_16	12	0.67	1.2	3.3	4.4585	18.0419	25	3.6	24.533	0.147	19.36	3.986	19.6
TM14	Maktau	large	active	A	Aug_16	13	0.67	1.2	3.3	4.4585	18.0419	25	3.6	24.885	0.087	20.19	3.357	19.36
TM14	Maktau	large	active	A	Aug_16	14	0.67	1.2	3.3	4.4585	18.0419	25	3.6	25.177	0.264	19.46	3.423	20.19
TM14	Maktau	large	active	A	Aug_16	15	0.67	1.2	3.3	4.4585	18.0419	25	3.6	25.408	0.076	19.38	2.605	19.46
TM14	Maktau	large	active	A	Aug_16	16	0.67	1.2	3.3	4.4585	18.0419	25	3.6	25.38	0.167	18.93	3.28	19.38
TM14	Maktau	large	active	A	Aug_16	17	0.67	1.2	3.3	4.4585	18.0419	25	3.6	24.887	0.322	20.84	4.883	18.93
TM14	Maktau	large	active	A	Aug_16	18	0.67	1.2	3.3	4.4585	18.0419	25	3.6	25.324	0.161	20.09	4.579	20.84
TM14	Maktau	large	active	A	Aug_16	19	0.67	1.2	3.3	4.4585	18.0419	25	3.6	25.588	0.162	21.04	4.841	20.09
TM14	Maktau	large	active	A	Aug_16	20	0.67	1.2	3.3	4.4585	18.0419	25	3.6	25.924	0.11	20.58	4.201	21.04
TM14	Maktau	large	active	A	Aug_16	21	0.67	1.2	3.3	4.4585	18.0419	25	3.6	26.084	0.348	19.82	5.555	20.58
TM14	Maktau	large	active	A	Aug_16	22	0.67	1.2	3.3	4.4585	18.0419	25	3.6	26.294	0.167	21.08	4.831	19.82
TM14	Maktau	large	active	A	Aug_16	23	0.67	1.2	3.3	4.4585	18.0419	25	3.6	26.308	0.146	20.64	4.584	21.08
TM14	Maktau	large	active	A	Aug_16	24	0.67	1.2	3.3	4.4585	18.0419	25	3.6	25.854	0.248	19.38	4.883	20.64
TM14	Maktau	large	active	A	Aug_16	25	0.67	1.2	3.3	4.4585	18.0419	25	3.6	25.674	0.161	18.64	4.909	19.38
TM14	Maktau	large	active	A	Aug_16	26	0.67	1.2	3.3	4.4585	18.0419	25	3.6	25.635	0.139	19.05	3.525	18.64
TM14	Maktau	large	active	A	Aug_16	27	0.67	1.2	3.3	4.4585	18.0419	25	3.6	25.776	0.121	19.51	3.79	19.05
TM14	Maktau	large	active	A	Aug_16	28	0.67	1.2	3.3	4.4585	18.0419	25	3.6	25.822	0.124	20.31	3.858	19.51
TM14	Maktau	large	active	A	Aug_16	29	0.67	1.2	3.3	4.4585	18.0419	25	3.6	25.912	0.393	18.48	3.45	20.31
TM14	Maktau	large	active	A	Aug_16	30	0.67	1.2	3.3	4.4585	18.0419	25	3.6	25.432	0.234	18.86	4.54	18.48
TM14	Maktau	large	active	A	Aug_16	31	0.67	1.2	3.3	4.4585	18.0419	25	3.6	25.354	0.165	19.68	4.775	18.86
TM14	Maktau	large	active	A	Sep_16	1	0.67	1.2	3.3	4.4585	18.0419	25	3.6	25.502	0.148	17.19	2.196	19.68
TM14	Maktau	large	active	A	Sep_16	2	0.67	1.2	3.3	4.4585	18.0419	25	3.6	25.244	0.108	18.73	3.353	17.19
TM14	Maktau	large	active	A	Sep_16	3	0.67	1.2	3.3	4.4585	18.0419	25	3.6	25.119	0.168	19.33	3.826	18.73
TM14	Maktau	large	active	A	Sep_16	4	0.67	1.2	3.3	4.4585	18.0419	25	3.6	25.236	0.115	19.75	4.37	19.33
TM14	Maktau	large	active	A	Sep_16	5	0.67	1.2	3.3	4.4585	18.0419	25	3.6	25.596	0.094	18.92	3.233	19.75
TM14	Maktau	large	active	A	Sep_16	6	0.67	1.2	3.3	4.4585	18.0419	25	3.6	25.518	0.156	19.81	3.632	18.92
TM14	Maktau	large	active	A	Sep_16	7	0.67	1.2	3.3	4.4585	18.0419	25	3.6	26.083	0.285	19.52	2.923	19.81
TM14	Maktau	large	active	A	Sep_16	8	0.67	1.2	3.3	4.4585	18.0419	25	3.6	25.541	0.218	20.53	5.917	19.52
TM14	Maktau	large	active	A	Sep_16	9	0.67	1.2	3.3	4.4585	18.0419	25	3.6	26.138	0.261	21.04	4.37	20.53
TM14	Maktau	large	active	A	Sep_16	10	0.67	1.2	3.3	4.4585	18.0419	25	3.6	26.16	0.196	18.8	3.838	21.04
TM14	Maktau	large	active	A	Sep_16	11	0.67	1.2	3.3	4.4585	18.0419	25	3.6	25.58	0.21	20.42	5.239	18.8
TM14	Maktau	large	active	A	Sep_16	12	0.67	1.2	3.3	4.4585	18.0419	25	3.6	25.643	0.112	21.34	4.56	20.42
TM14	Maktau	large	active	A	Sep_16	13	0.67	1.2	3.3	4.4585	18.0419	25	3.6	25.69	0.204	19.96	5.583	21.34
TM14	Maktau	large	active	A	Sep_16	14	0.67	1.2	3.3	4.4585	18.0419	25	3.6	25.926	0.259	19.25	2.799	19.96
TM14	Maktau	large	active	A	Sep_16	15	0.67	1.2	3.3	4.4585	18.0419	25	3.6	25.862	0.158	21.3	4.757	19.25
TM14	Maktau	large	active	A	Sep_16	16	0.67	1.2	3.3	4.4585	18.0419	25	3.6	26.244	0.088	20.86	4.164	21.3
TM14	Maktau	large	active	A	Sep_16	17	0.67	1.2	3.3	4.4585	18.0419	25	3.6	26.357	0.157	21.23	5.243	20.86
TM14	Maktau	large	active	A	Sep_16	18	0.67	1.2	3.3	4.4585	18.0419	25	3.6	26.314	0.175	20.06	4.882	21.23
TM14	Maktau	large	active	A	Sep_16	19	0.67	1.2	3.3	4.4585	18.0419	25	3.6	25.793	0.373	20.41	5.113	20.06
TM14	Maktau	large	active	A	Sep_16	20	0.67	1.2	3.3	4.4585	18.0419	25	3.6	25.369	0.179	19.76	4.752	20.41
TM14	Maktau	large	active	A	Sep_16	21	0.67	1.2	3.3	4.4585	18.0419	25	3.6	25.371	0.149	20.31	4.627	19.76
TM14	Maktau	large	active	A	Sep_16	22	0.67	1.2	3.3	4.4585	18.0419	25	3.6	25.432	0.177	20	4.635	20.31
TM14	Maktau	large	active	A	Sep_16	23	0.67	1.2	3.3	4.4585	18.0419	25	3.6	25.848	0.284	20.58	3.99	20
TM14	Maktau	large	active	A	Sep_16	24	0.67	1.2	3.3	4.4585	18.0419	25	3.6	26.279	0.174	20.71	3.641	20.58
TM14	Maktau	large	active	A	Sep_16	25	0.67	1.2	3.3	4.4585	18.0419	25	3.6	26.326	0.191	21.79	4.683	20.71
TM14	Maktau	large	active	A	Sep_16	26	0.67	1.2	3.3	4.4585	18.0419	25	3.6	26.549	0.138	21.34	4.984	21.79
TM14	Maktau	large	active	A	Sep_16	27	0.67	1.2	3.3	4.4585	18.0419	25	3.6	26.479	0.24	20.93	5.258	21.34
TM14	Maktau	large	active	A	Sep_16	28	0.67	1.2	3.3	4.4585	18.0419	25	3.6	26.651	0.077	21.41	3.669	20.93
TM14	Maktau	large	active	A	Sep_16	29	0.67	1.2	3.3	4.4585	18.0419	25	3.6	26.838	0.088	20.55	3.421	21.41
TM14	Maktau	large	active	A	Sep_16	30	0.67	1.2	3.3	4.4585	18.0419	25	3.6	26.744	0.177	21.69	4.874	20.55
TM14	Maktau	large	active	A	Oct_16	1	0.67	1.2	3.3	4.4585	18.0419	25	3.6	26.549	0.264	20.74	4.938	21.69
TM14	Maktau	large	active	A	Oct_16	2	0.67	1.2	3.3	4.4585	18.0419	25	3.6	26.213	0.159	20.28	3.846	20.74
TM14	Maktau	large	active	A	Oct_16	3	0.67	1.2	3.3	4.4585	18.0419	25	3.6	26.636	0.37	22.72	5.442	20.28
TM14	Maktau	large	active	A	Oct_16	4	0.67	1.2	3.3	4.4585	18.0419	25	3.6	27.253	0.167	22.38	4.583	22.72
TM14	Maktau	large	active	A	Oct_16	5	0.67	1.2	3.3	4.4585	18.0419	25	3.6	27.349	0.141	21.51	3.604	22.38
TM14	Maktau	large	active	A	Oct_16	6	0.67	1.2	3.3	4.4585	18.0419	25	3.6	27.197	0.192	21.29	4.597	21.51
TM14	Maktau	large	active	A	Oct_16	7	0.67	1.2	3.3	4.4585	18.0419	25	3.6	27.58	0.179	23.12	5.721	21.29
TM14	Maktau	large	active	A	Oct_16	8	0.67	1.2	3.3	4.4585	18.0419	25	3.6	28.088	0.332	22.66	6.063	23.12
TM14	Maktau	large	active	A	Oct_16	9	0.67	1.2	3.3	4.4585	18.0419	25	3.6	28.447	0.165	22.76	4.997	22.66
TM14	Maktau	large	active	A	Oct_16	10	0.67	1.2	3.3	4.4585	18.0419	25	3.6	28.72	0.182	22.04	5.186	22.76
TM14	Maktau	large	active	A	Oct_16	11	0.67	1.2	3.3	4.4585	18.0419	25	3.6	28.533	0.165	22.85	4.977	22.04
TM14	Maktau	large	active	A	Oct_16	12	0.67	1.2	3.3	4.4585	18.0419	25	3.6	28.283	0.264	21.69	5.395	22.85
TM14	Maktau	large	active	A	Oct_16	13	0.67	1.2	3.3	4.4585	18.0419	25	3.6	27.721	0.401	22.1	5.972	21.69
TM14	Maktau	large	active	A	Oct_16	14	0.67	1.2	3.3	4.4585	18.0419	25	3.6	27.478	0.189	22.17	5.112	22.1
TM14	Maktau	large	active	A	Oct_16	15	0.67	1.2	3.3	4.4585	18.0419	25	3.6	27.402	0.201	22.28	5.402	22.17
TM14	Maktau	large	active	A	Oct_16	16	0.67	1.2	3.3	4.4585	18.0419	25	3.6	27.183	0.237	21.86	5.799	22.28
TM14	Maktau	large	active	A	Oct_16	17	0.67	1.2	3.3	4.4585	18.0419	25	3.6	27.253	0.222	21.99	6.012	21.86
TM14	Maktau	large	active	A	Oct_16	18	0.67	1.2	3.3	4.4585	18.0419	25	3.6	27.228	0.17	22.41	5.204	21.99
TM14	Maktau	large	active	A	Oct_16	19	0.67	1.2	3.3	4.4585	18.0419	25	3.6	27.349	0.199	21.89	4.71	22.41
TM14	Maktau	large	active	A	Oct_16	20	0.67	1.2	3.3	4.4585	18.0419	25	3.6	26.83	0.223	21.94	5.195	21.89
TM14	Maktau	large	active	A	Oct_16	21	0.67	1.2	3.3	4.4585	18.0419	25	3.6	26.91	0.283	21.74	5.275	21.94
TM14	Maktau	large	active	A	Oct_16	22	0.67	1.2	3.3	4.4585	18.0419	25	3.6	26.783	0.207	22.26	5.941	21.74
TM14	Maktau	large	active	A	Oct_16	23	0.67	1.2	3.3	4.4585	18.0419	25	3.6	27.05	0.252	23	5.736	22.26
TM14	Maktau	large	active	A	Oct_16	24	0.67	1.2	3.3	4.4585	18.0419	25	3.6	27.341	0.155	21.97	5.13	23
TM14	Maktau	large	active	A	Oct_16	25	0.67	1.2	3.3	4.4585	18.0419	25	3.6	27.333	0.161	21.95	5.259	21.97
TM14	Maktau	large	active	A	Oct_16	26	0.67	1.2	3.3	4.4585	18.0419	25	3.6	27.705	0.076	23.06	4.374	21.95
TM14	Maktau	large	active	A	Oct_16	27	0.67	1.2	3.3	4.4585	18.0419	25	3.6	28.042	0.32	22.66	4.536	23.06
TM14	Maktau	large	active	A	Oct_16	28	0.67	1.2	3.3	4.4585	18.0419	25	3.6	27.791	0.112	22.7	5.008	22.66
TM14	Maktau	large	active	A	Oct_16	29	0.67	1.2	3.3	4.4585	18.0419	25	3.6	27.978	0.159	23.02	6.429	22.7
TM14	Maktau	large	active	A	Oct_16	30	0.67	1.2	3.3	4.4585	18.0419	25	3.6	28.33	0.117	24.17	5.087	23.02
TM14	Maktau	large	active	A	Oct_16	31	0.67	1.2	3.3	4.4585	18.0419	25	3.6	28.603	0.075	24.36	4.902	24.17
TM14	Maktau	large	active	A	Nov_16	1	0.67	1.2	3.3	4.4585	18.0419	25	3.6	28.814	0.141	24.13	4.124	24.36
TM14	Maktau	large	active	A	Nov_16	2	0.67	1.2	3.3	4.4585	18.0419	25	3.6	28.743	0.099	23.35	4.108	24.13
TM14	Maktau	large	active	A	Nov_16	3	0.67	1.2	3.3	4.4585	18.0419	25	3.6	28.689	0.226	23.41	4.684	23.35
TM14	Maktau	large	active	A	Nov_16	4	0.67	1.2	3.3	4.4585	18.0419	25	3.6	28.174	0.274	22.95	4.376	23.41
TM14	Maktau	large	active	A	Nov_16	5	0.67	1.2	3.3	4.4585	18.0419	25	3.6	27.689	0.186	22.84	4.454	22.95
TM14	Maktau	large	active	A	Nov_16	6	0.67	1.2	3.3	4.4585	18.0419	25	3.6	27.431	0.168	23.31	4.79	22.84
TM14	Maktau	large	active	A	Nov_16	7	0.67	1.2	3.3	4.4585	18.0419	25	3.6	27.556	0.171	22.69	5.299	23.31
TM14	Maktau	large	active	A	Nov_16	8	0.67	1.2	3.3	4.4585	18.0419	25	3.6	27.658	0.15	23.49	4.936	22.69
TM14	Maktau	large	active	A	Nov_16	9	0.67	1.2	3.3	4.4585	18.0419	25	3.6	27.759	0.068	23.73	4.532	23.49
TM14	Maktau	large	active	A	Nov_16	10	0.67	1.2	3.3	4.4585	18.0419	25	3.6	27.76	0.149	23.77	4.197	23.73
TM14	Maktau	large	active	A	Nov_16	11	0.67	1.2	3.3	4.4585	18.0419	25	3.6	27.814	0.11	23.79	4.256	23.77
TM14	Maktau	large	active	A	Nov_16	12	0.67	1.2	3.3	4.4585	18.0419	25	3.6	27.556	0.334	22.45	3.164	23.79
TM14	Maktau	large	active	A	Nov_16	13	0.67	1.2	3.3	4.4585	18.0419	25	3.6	26.775	0.252	23.28	4.056	22.45
TM14	Maktau	large	active	A	Nov_16	14	0.67	1.2	3.3	4.4585	18.0419	25	3.6	26.371	0.218	23.59	3.809	23.28
TM14	Maktau	large	active	A	Nov_16	15	0.67	1.2	3.3	4.4585	18.0419	25	3.6	26.346	0.103	22.73	4.305	23.59
TM14	Maktau	large	active	A	Nov_16	16	0.67	1.2	3.3	4.4585	18.0419	25	3.6	26.886	0.263	22.56	3.387	22.73
TM14	Maktau	large	active	A	Nov_16	17	0.67	1.2	3.3	4.4585	18.0419	25	3.6	27.144	0.186	23.32	4.179	22.56
TM14	Maktau	large	active	A	Nov_16	18	0.67	1.2	3.3	4.4585	18.0419	25	3.6	27.322	0.081	24.51	4.338	23.32
TM14	Maktau	large	active	A	Nov_16	19	0.67	1.2	3.3	4.4585	18.0419	25	3.6	27.736	0.058	22.78	3.494	24.51
TM14	Maktau	large	active	A	Nov_16	20	0.67	1.2	3.3	4.4585	18.0419	25	3.6	27.877	0.073	23.45	3.819	22.78
TM14	Maktau	large	active	A	Nov_16	21	0.67	1.2	3.3	4.4585	18.0419	25	3.6	27.908	0.14	23.29	4.153	23.45
TM14	Maktau	large	active	A	Nov_16	22	0.67	1.2	3.3	4.4585	18.0419	25	3.6	27.533	0.179	23.79	4.859	23.29
TM14	Maktau	large	active	A	Nov_16	23	0.67	1.2	3.3	4.4585	18.0419	25	3.6	27.603	0.139	23.19	5.088	23.79
TM14	Maktau	large	active	A	Nov_16	24	0.67	1.2	3.3	4.4585	18.0419	25	3.6	27.588	0.108	23.63	5.255	23.19
TM14	Maktau	large	active	A	Nov_16	25	0.67	1.2	3.3	4.4585	18.0419	25	3.6	27.658	0.168	23.41	4.824	23.63
TM14	Maktau	large	active	A	Nov_16	26	0.67	1.2	3.3	4.4585	18.0419	25	3.6	27.689	0.106	23.89	4.469	23.41
TM14	Maktau	large	active	A	Nov_16	27	0.67	1.2	3.3	4.4585	18.0419	25	3.6	27.806	0.094	23.2	4.237	23.89
TM14	Maktau	large	active	A	Nov_16	28	0.67	1.2	3.3	4.4585	18.0419	25	3.6	27.861	0.115	21.56	2.292	23.2
TM14	Maktau	large	active	A	Nov_16	29	0.67	1.2	3.3	4.4585	18.0419	25	3.6	27.463	0.136	22.58	2.621	21.56
TM14	Maktau	large	active	A	Nov_16	30	0.67	1.2	3.3	4.4585	18.0419	25	3.6	27.088	0.252	22.82	3.282	22.58
TM14	Maktau	large	active	A	Dec_16	1	0.67	1.2	3.3	4.4585	18.0419	25	3.6	26.166	0.277	22.82	3.358	22.82
TM14	Maktau	large	active	A	Dec_16	2	0.67	1.2	3.3	4.4585	18.0419	25	3.6	25.69	0.17	23.81	3.698	22.82
TM14	Maktau	large	active	A	Dec_16	3	0.67	1.2	3.3	4.4585	18.0419	25	3.6	25.713	0.108	22.81	2.969	23.81
TM14	Maktau	large	active	A	Dec_16	4	0.67	1.2	3.3	4.4585	18.0419	25	3.6	25.322	0.209	22.93	3.338	22.81
TM14	Maktau	large	active	A	Dec_16	5	0.67	1.2	3.3	4.4585	18.0419	25	3.6	25.123	0.283	23.43	3.859	22.93
TM14	Maktau	large	active	A	Dec_16	6	0.67	1.2	3.3	4.4585	18.0419	25	3.6	24.908	0.168	23.18	4.065	23.43
TM14	Maktau	large	active	A	Dec_16	7	0.67	1.2	3.3	4.4585	18.0419	25	3.6	25.012	0.247	23.37	3.623	23.18
TM14	Maktau	large	active	A	Dec_16	8	0.67	1.2	3.3	4.4585	18.0419	25	3.6	25.611	0.158	22.64	3.964	23.37
TM14	Maktau	large	active	A	Dec_16	9	0.67	1.2	3.3	4.4585	18.0419	25	3.6	26.377	0.134	23.48	3.975	22.64
TM14	Maktau	large	active	A	Dec_16	10	0.67	1.2	3.3	4.4585	18.0419	25	3.6	26.924	0.066	22.46	4.075	23.48
TM14	Maktau	large	active	A	Dec_16	11	0.67	1.2	3.3	4.4585	18.0419	25	3.6	26.943	0.375	22.44	3.241	22.46
TM14	Maktau	large	active	A	Dec_16	12	0.67	1.2	3.3	4.4585	18.0419	25	3.6	26.908	0.069	22.83	3.515	22.44
TM14	Maktau	large	active	A	Dec_16	13	0.67	1.2	3.3	4.4585	18.0419	25	3.6	26.58	0.242	22.54	3.578	22.83
TM14	Maktau	large	active	A	Dec_16	14	0.67	1.2	3.3	4.4585	18.0419	25	3.6	25.986	0.222	22.78	3.582	22.54
TM14	Maktau	large	active	A	Dec_16	15	0.67	1.2	3.3	4.4585	18.0419	25	3.6	25.721	0.159	23.17	4.341	22.78
TM14	Maktau	large	active	A	Dec_16	16	0.67	1.2	3.3	4.4585	18.0419	25	3.6	26.424	0.239	23.79	4.682	23.17
TM14	Maktau	large	active	A	Dec_16	17	0.67	1.2	3.3	4.4585	18.0419	25	3.6	27.16	0.215	24.28	4.57	23.79
TM14	Maktau	large	active	A	Dec_16	18	0.67	1.2	3.3	4.4585	18.0419	25	3.6	27.121	0.208	24.13	3.967	24.28
TM14	Maktau	large	active	A	Dec_16	19	0.67	1.2	3.3	4.4585	18.0419	25	3.6	26.84	0.336	23.88	4.031	24.13
TM14	Maktau	large	active	A	Dec_16	20	0.67	1.2	3.3	4.4585	18.0419	25	3.6	26.361	0.161	24.53	4.221	23.88
TM14	Maktau	large	active	A	Dec_16	21	0.67	1.2	3.3	4.4585	18.0419	25	3.6	26.315	0.155	23.88	3.873	24.53
TM14	Maktau	large	active	A	Dec_16	22	0.67	1.2	3.3	4.4585	18.0419	25	3.6	26.263	0.209	23.83	3.954	23.88
TM14	Maktau	large	active	A	Dec_16	23	0.67	1.2	3.3	4.4585	18.0419	25	3.6	25.754	0.399	23.25	4.482	23.83
TM14	Maktau	large	active	A	Dec_16	24	0.67	1.2	3.3	4.4585	18.0419	25	3.6	25.332	0.211	23.24	3.609	23.25
TM14	Maktau	large	active	A	Dec_16	25	0.67	1.2	3.3	4.4585	18.0419	25	3.6	25.238	0.209	23.73	4.414	23.24
TM14	Maktau	large	active	A	Dec_16	26	0.67	1.2	3.3	4.4585	18.0419	25	3.6	25.619	0.147	24.32	4.019	23.73
TM14	Maktau	large	active	A	Dec_16	27	0.67	1.2	3.3	4.4585	18.0419	25	3.6	26.121	0.247	24.3	4.135	24.32
TM14	Maktau	large	active	A	Dec_16	28	0.67	1.2	3.3	4.4585	18.0419	25	3.6	26.707	0.339	24.37	5.312	24.3
TM14	Maktau	large	active	A	Dec_16	29	0.67	1.2	3.3	4.4585	18.0419	25	3.6	27.501	0.138	23.05	4.643	24.37
TM14	Maktau	large	active	A	Dec_16	30	0.67	1.2	3.3	4.4585	18.0419	25	3.6	27.76	0.162	22.59	2.783	23.05
TM14	Maktau	large	active	A	Dec_16	31	0.67	1.2	3.3	4.4585	18.0419	25	3.6	27.33	0.156	23.45	3.575	22.59
TM14	Maktau	large	active	A	Jan_17	1	0.67	1.2	3.3	4.4585	18.0419	25	3.6	26.871	0.379	22.7	3.169	23.45
TM14	Maktau	large	active	A	Jan_17	2	0.67	1.2	3.3	4.4585	18.0419	25	3.6	26.222	0.193	24.15	4.251	22.7
TM14	Maktau	large	active	A	Jan_17	3	0.67	1.2	3.3	4.4585	18.0419	25	3.6	26.246	0.193	24.22	4.063	24.15
TM14	Maktau	large	active	A	Jan_17	4	0.67	1.2	3.3	4.4585	18.0419	25	3.6	26.182	0.143	23.97	4.114	24.22
TM14	Maktau	large	active	A	Jan_17	5	0.67	1.2	3.3	4.4585	18.0419	25	3.6	25.996	0.272	23.66	4.371	23.97
TM14	Maktau	large	active	A	Jan_17	6	0.67	1.2	3.3	4.4585	18.0419	25	3.6	26.076	0.313	23.87	4.556	23.66
TM14	Maktau	large	active	A	Jan_17	7	0.67	1.2	3.3	4.4585	18.0419	25	3.6	26.162	0.306	24.76	5.18	23.87
TM14	Maktau	large	active	A	Jan_17	8	0.67	1.2	3.3	4.4585	18.0419	25	3.6	26.455	0.198	25.61	4.724	24.76
TM14	Maktau	large	active	A	Jan_17	9	0.67	1.2	3.3	4.4585	18.0419	25	3.6	26.815	0.085	24.83	3.582	25.61
TM14	Maktau	large	active	A	Jan_17	10	0.67	1.2	3.3	4.4585	18.0419	25	3.6	26.541	0.237	23.45	3.675	24.83
TM14	Maktau	large	active	A	Jan_17	11	0.67	1.2	3.3	4.4585	18.0419	25	3.6	25.674	0.34	23.12	4.144	23.45
TM14	Maktau	large	active	A	Jan_17	12	0.67	1.2	3.3	4.4585	18.0419	25	3.6	25.033	0.267	23.68	4.889	23.12
TM14	Maktau	large	active	A	Jan_17	13	0.67	1.2	3.3	4.4585	18.0419	25	3.6	25.072	0.207	24.29	5.014	23.68
TM14	Maktau	large	active	A	Jan_17	14	0.67	1.2	3.3	4.4585	18.0419	25	3.6	25.387	0.217	25.13	5.111	24.29
TM14	Maktau	large	active	A	Jan_17	15	0.67	1.2	3.3	4.4585	18.0419	25	3.6	25.83	0.195	24.91	4.904	25.13
TM14	Maktau	large	active	A	Jan_17	16	0.67	1.2	3.3	4.4585	18.0419	25	3.6	26.207	0.215	23.59	4.84	24.91
TM14	Maktau	large	active	A	Jan_17	17	0.67	1.2	3.3	4.4585	18.0419	25	3.6	26.002	0.218	23.43	4.614	23.59
TM14	Maktau	large	active	A	Jan_17	18	0.67	1.2	3.3	4.4585	18.0419	25	3.6	25.69	0.17	24.41	4.222	23.43
TM14	Maktau	large	active	A	Jan_17	19	0.67	1.2	3.3	4.4585	18.0419	25	3.6	25.901	0.156	25.34	4.844	24.41
TM14	Maktau	large	active	A	Jan_17	20	0.67	1.2	3.3	4.4585	18.0419	25	3.6	26.347	0.152	24.74	5.107	25.34
TM14	Maktau	large	active	A	Jan_17	21	0.67	1.2	3.3	4.4585	18.0419	25	3.6	26.526	0.125	24.58	4.469	24.74
TM14	Maktau	large	active	A	Jan_17	22	0.67	1.2	3.3	4.4585	18.0419	25	3.6	26.69	0.123	24.22	4.147	24.58
TM14	Maktau	large	active	A	Jan_17	23	0.67	1.2	3.3	4.4585	18.0419	25	3.6	26.448	0.149	23.75	4.432	24.22
TM14	Maktau	large	active	A	Jan_17	24	0.67	1.2	3.3	4.4585	18.0419	25	3.6	26.388	0.195	24.81	5.889	23.75
TM14	Maktau	large	active	A	Jan_17	25	0.67	1.2	3.3	4.4585	18.0419	25	3.6	26.744	0.174	25.34	5.163	24.81
TM14	Maktau	large	active	A	Jan_17	26	0.67	1.2	3.3	4.4585	18.0419	25	3.6	27.002	0.163	24.67	5.171	25.34
TM14	Maktau	large	active	A	Jan_17	27	0.67	1.2	3.3	4.4585	18.0419	25	3.6	27.277	0.174	25.4	4.423	24.67
TM14	Maktau	large	active	A	Jan_17	28	0.67	1.2	3.3	4.4585	18.0419	25	3.6	27.564	0.186	25.03	4.238	25.4
TM14	Maktau	large	active	A	Jan_17	29	0.67	1.2	3.3	4.4585	18.0419	25	3.6	27.9	0.156	25.55	4.544	25.03
TM14	Maktau	large	active	A	Jan_17	30	0.67	1.2	3.3	4.4585	18.0419	25	3.6	28.26	0.224	25.94	4.631	25.55
TM14	Maktau	large	active	A	Jan_17	31	0.67	1.2	3.3	4.4585	18.0419	25	3.6	28.292	0.226	23.51	2.629	25.94
TM14	Maktau	large	active	A	Feb_17	1	0.67	1.2	3.3	4.4585	18.0419	25	3.6	27.378	0.338	24.51	4.589	23.51
TM14	Maktau	large	active	A	Feb_17	2	0.67	1.2	3.3	4.4585	18.0419	25	3.6	27.105	0.25	24.78	4.552	24.51
TM14	Maktau	large	active	A	Feb_17	3	0.67	1.2	3.3	4.4585	18.0419	25	3.6	27.076	0.341	25.57	5.118	24.78
TM14	Maktau	large	active	A	Feb_17	4	0.67	1.2	3.3	4.4585	18.0419	25	3.6	27.595	0.19	25.05	4.39	25.57
TM14	Maktau	large	active	A	Feb_17	5	0.67	1.2	3.3	4.4585	18.0419	25	3.6	27.635	0.428	23.96	4.514	25.05
TM14	Maktau	large	active	A	Feb_17	6	0.67	1.2	3.3	4.4585	18.0419	25	3.6	27.268	0.306	23.33	4.289	23.96
TM14	Maktau	large	active	A	Feb_17	7	0.67	1.2	3.3	4.4585	18.0419	25	3.6	26.729	0.139	24.18	4.204	23.33
TM14	Maktau	large	active	A	Feb_17	8	0.67	1.2	3.3	4.4585	18.0419	25	3.6	26.658	0.168	23.83	3.981	24.18
TM14	Maktau	large	active	A	Feb_17	9	0.67	1.2	3.3	4.4585	18.0419	25	3.6	26.277	0.332	24	4.148	23.83
TM14	Maktau	large	active	A	Feb_17	10	0.67	1.2	3.3	4.4585	18.0419	25	3.6	25.888	0.42	23.5	3.595	24
TM14	Maktau	large	active	A	Feb_17	11	0.67	1.2	3.3	4.4585	18.0419	25	3.6	25.51	0.142	23.6	4.798	23.5
TM14	Maktau	large	active	A	Feb_17	12	0.67	1.2	3.3	4.4585	18.0419	25	3.6	25.949	0.314	23.83	6.749	23.6
TM14	Maktau	large	active	A	Feb_17	13	0.67	1.2	3.3	4.4585	18.0419	25	3.6	26.713	0.133	24.34	5.381	23.83
TM14	Maktau	large	active	A	Feb_17	14	0.67	1.2	3.3	4.4585	18.0419	25	3.6	27.291	0.081	24.5	4.38	24.34
TM14	Maktau	large	active	A	Feb_17	15	0.67	1.2	3.3	4.4585	18.0419	25	3.6	27.439	0.191	24.53	5.16	24.5
TM14	Maktau	large	active	A	Feb_17	16	0.67	1.2	3.3	4.4585	18.0419	25	3.6	27.548	0.164	24.03	5.625	24.53
TM14	Maktau	large	active	A	Feb_17	17	0.67	1.2	3.3	4.4585	18.0419	25	3.6	28.002	0.285	25.01	5.63	24.03
TM14	Maktau	large	active	A	Feb_17	18	0.67	1.2	3.3	4.4585	18.0419	25	3.6	28.665	0.087	24.93	4.821	25.01
TM14	Maktau	large	active	A	Feb_17	19	0.67	1.2	3.3	4.4585	18.0419	25	3.6	28.618	0.179	24.45	4.714	24.93
TM14	Maktau	large	active	A	Feb_17	20	0.67	1.2	3.3	4.4585	18.0419	25	3.6	28.057	0.51	23.58	3.719	24.45
TM14	Maktau	large	active	A	Feb_17	21	0.67	1.2	3.3	4.4585	18.0419	25	3.6	26.737	0.415	24.54	4.684	23.58
TM14	Maktau	large	active	A	Feb_17	22	0.67	1.2	3.3	4.4585	18.0419	25	3.6	27.097	0.243	24.03	3.938	24.54
TM14	Maktau	large	active	A	Feb_17	23	0.67	1.2	3.3	4.4585	18.0419	25	3.6	27.253	0.184	25.26	3.907	24.03
TM14	Maktau	large	active	A	Feb_17	24	0.67	1.2	3.3	4.4585	18.0419	25	3.6	27.689	0.164	25.35	4.045	25.26
TM14	Maktau	large	active	A	Feb_17	25	0.67	1.2	3.3	4.4585	18.0419	25	3.6	27.838	0.212	25.01	4.77	25.35
TM14	Maktau	large	active	A	Feb_17	26	0.67	1.2	3.3	4.4585	18.0419	25	3.6	27.752	0.161	24.8	5.238	25.01
TM14	Maktau	large	active	A	Feb_17	27	0.67	1.2	3.3	4.4585	18.0419	25	3.6	28.057	0.218	25.25	4.481	24.8
TM14	Maktau	large	active	A	Feb_17	28	0.67	1.2	3.3	4.4585	18.0419	25	3.6	28.306	0.136	24.96	4.359	25.25
TM14	Maktau	large	active	A	Mar_17	1	0.67	1.2	3.3	4.4585	18.0419	25	3.6	27.923	0.249	24.36	3.972	24.96
TM14	Maktau	large	active	A	Mar_17	2	0.67	1.2	3.3	4.4585	18.0419	25	3.6	27.744	0.321	23.97	5.604	24.36
TM14	Maktau	large	active	A	Mar_17	3	0.67	1.2	3.3	4.4585	18.0419	25	3.6	28.564	0.249	24.76	5.374	23.97
TM14	Maktau	large	active	A	Mar_17	4	0.67	1.2	3.3	4.4585	18.0419	25	3.6	29.252	0.2	23.35	3.669	24.76
TM14	Maktau	large	active	A	Mar_17	5	0.67	1.2	3.3	4.4585	18.0419	25	3.6	28.986	0.269	25.59	5.689	23.35
TM14	Maktau	large	active	A	Mar_17	6	0.67	1.2	3.3	4.4585	18.0419	25	3.6	29.353	0.116	26.55	5.668	25.59
TM14	Maktau	large	active	A	Mar_17	7	0.67	1.2	3.3	4.4585	18.0419	25	3.6	29.805	0.083	27.22	5.503	26.55
TM14	Maktau	large	active	A	Mar_17	8	0.67	1.2	3.3	4.4585	18.0419	25	3.6	29.945	0.281	25.83	5.799	27.22
TM14	Maktau	large	active	A	Mar_17	9	0.67	1.2	3.3	4.4585	18.0419	25	3.6	29.657	0.112	25.9	5.733	25.83
TM14	Maktau	large	active	A	Mar_17	10	0.67	1.2	3.3	4.4585	18.0419	25	3.6	29.946	0.093	26.86	5.059	25.9
TM14	Maktau	large	active	A	Mar_17	11	0.67	1.2	3.3	4.4585	18.0419	25	3.6	29.587	0.413	25.19	4.89	26.86
TM14	Maktau	large	active	A	Mar_17	12	0.67	1.2	3.3	4.4585	18.0419	25	3.6	29.034	0.311	24.26	4.622	25.19
TM14	Maktau	large	active	A	Mar_17	13	0.67	1.2	3.3	4.4585	18.0419	25	3.6	28.735	0.169	25.68	6.043	24.26
TM14	Maktau	large	active	A	Mar_17	14	0.67	1.2	3.3	4.4585	18.0419	25	3.6	29.439	0.079	25.12	4.842	25.68
TM14	Maktau	large	active	A	Mar_17	15	0.67	1.2	3.3	4.4585	18.0419	25	3.6	29.735	0.066	25.65	4.516	25.12
TM14	Maktau	large	active	A	Mar_17	16	0.67	1.2	3.3	4.4585	18.0419	25	3.6	29.852	0.075	25.46	5.104	25.65
TM14	Maktau	large	active	A	Mar_17	17	0.67	1.2	3.3	4.4585	18.0419	25	3.6	30.117	0.194	24.56	5.413	25.46
TM14	Maktau	large	active	A	Mar_17	18	0.67	1.2	3.3	4.4585	18.0419	25	3.6	29.649	0.384	22.52	3.232	24.56
TM14	Maktau	large	active	A	Mar_17	19	0.67	1.2	3.3	4.4585	18.0419	25	3.6	28.689	0.258	24.42	3.989	22.52
TM14	Maktau	large	active	A	Mar_17	20	0.67	1.2	3.3	4.4585	18.0419	25	3.6	28.385	0.177	24.3	4.401	24.42
TM14	Maktau	large	active	A	Mar_17	21	0.67	1.2	3.3	4.4585	18.0419	25	3.6	28.798	0.058	25	3.975	24.3
TM14	Maktau	large	active	A	Mar_17	22	0.67	1.2	3.3	4.4585	18.0419	25	3.6	29.23	0.331	24.64	4.032	25
TM14	Maktau	large	active	A	Mar_17	23	0.67	1.2	3.3	4.4585	18.0419	25	3.6	29.017	0.235	23.77	3.977	24.64
TM14	Maktau	large	active	A	Mar_17	24	0.67	1.2	3.3	4.4585	18.0419	25	3.6	28.814	0.13	24.56	4.218	23.77
TM14	Maktau	large	active	A	Mar_17	25	0.67	1.2	3.3	4.4585	18.0419	25	3.6	29.032	0.117	25.85	4.456	24.56
TM14	Maktau	large	active	A	Mar_17	26	0.67	1.2	3.3	4.4585	18.0419	25	3.6	29.478	0.075	25.72	4.243	25.85
TM14	Maktau	large	active	A	Mar_17	27	0.67	1.2	3.3	4.4585	18.0419	25	3.6	29.384	0.068	24.35	3.353	25.72
TM14	Maktau	large	active	A	Mar_17	28	0.67	1.2	3.3	4.4585	18.0419	25	3.6	29.001	0.237	24.22	3.828	24.35
TM14	Maktau	large	active	A	Mar_17	29	0.67	1.2	3.3	4.4585	18.0419	25	3.6	28.47	0.216	22.55	3.838	24.22
TM14	Maktau	large	active	A	Mar_17	30	0.67	1.2	3.3	4.4585	18.0419	25	3.6	28.408	0.205	24.15	4.364	22.55
TM14	Maktau	large	active	A	Mar_17	31	0.67	1.2	3.3	4.4585	18.0419	25	3.6	28.315	0.135	24.02	4.141	24.15
TM36	Maktau	miniature	active	C	Mar_16	1	0.04	0.25	1.4	0.1275	2.6427	10	1.3	29.709	0.45	23.43	3.973	22.89
TM36	Maktau	miniature	active	C	Mar_16	2	0.04	0.25	1.4	0.1275	2.6427	10	1.3	29.023	0.708	24.92	5.164	23.43
TM36	Maktau	miniature	active	C	Mar_16	3	0.04	0.25	1.4	0.1275	2.6427	10	1.3	29.141	0.685	24.8	3.991	24.92
TM36	Maktau	miniature	active	C	Mar_16	4	0.04	0.25	1.4	0.1275	2.6427	10	1.3	29.99	0.787	25.01	4.385	24.8
TM36	Maktau	miniature	active	C	Mar_16	5	0.04	0.25	1.4	0.1275	2.6427	10	1.3	30.232	0.751	24.28	5.121	25.01
TM36	Maktau	miniature	active	C	Mar_16	6	0.04	0.25	1.4	0.1275	2.6427	10	1.3	30.139	0.768	25.24	5.036	24.28
TM36	Maktau	miniature	active	C	Mar_16	7	0.04	0.25	1.4	0.1275	2.6427	10	1.3	30.493	1.03	25.41	4.452	25.24
TM36	Maktau	miniature	active	C	Mar_16	8	0.04	0.25	1.4	0.1275	2.6427	10	1.3	30.561	0.817	25.67	5.154	25.41
TM36	Maktau	miniature	active	C	Mar_16	9	0.04	0.25	1.4	0.1275	2.6427	10	1.3	29.679	0.739	24.48	3.963	25.67
TM36	Maktau	miniature	active	C	Mar_16	10	0.04	0.25	1.4	0.1275	2.6427	10	1.3	28.984	0.728	22.8	4.435	24.48
TM36	Maktau	miniature	active	C	Mar_16	11	0.04	0.25	1.4	0.1275	2.6427	10	1.3	29.177	0.916	25.63	4.472	22.8
TM36	Maktau	miniature	active	C	Mar_16	12	0.04	0.25	1.4	0.1275	2.6427	10	1.3	30.186	0.701	25.95	4.289	25.63
TM36	Maktau	miniature	active	C	Mar_16	13	0.04	0.25	1.4	0.1275	2.6427	10	1.3	30.498	0.868	24.95	6.024	25.95
TM36	Maktau	miniature	active	C	Mar_16	14	0.04	0.25	1.4	0.1275	2.6427	10	1.3	31.152	0.749	25.95	4.829	24.95
TM36	Maktau	miniature	active	C	Mar_16	15	0.04	0.25	1.4	0.1275	2.6427	10	1.3	31.403	0.728	25.48	5.016	25.95
TM36	Maktau	miniature	active	C	Mar_16	16	0.04	0.25	1.4	0.1275	2.6427	10	1.3	31.497	0.849	25.93	5.507	25.48
TM36	Maktau	miniature	active	C	Mar_16	17	0.04	0.25	1.4	0.1275	2.6427	10	1.3	31.91	0.921	25.44	4.363	25.93
TM36	Maktau	miniature	active	C	Mar_16	18	0.04	0.25	1.4	0.1275	2.6427	10	1.3	31.918	0.662	26.16	3.938	25.44
TM36	Maktau	miniature	active	C	Mar_16	19	0.04	0.25	1.4	0.1275	2.6427	10	1.3	30.986	0.801	25.19	4.529	26.16
TM36	Maktau	miniature	active	C	Mar_16	20	0.04	0.25	1.4	0.1275	2.6427	10	1.3	30.904	0.75	26.1	4.998	25.19
TM36	Maktau	miniature	active	C	Mar_16	21	0.04	0.25	1.4	0.1275	2.6427	10	1.3	31.472	0.791	26.15	4.351	26.1
TM36	Maktau	miniature	active	C	Mar_16	22	0.04	0.25	1.4	0.1275	2.6427	10	1.3	31.185	0.808	26.29	4.692	26.15
TM36	Maktau	miniature	active	C	Mar_16	23	0.04	0.25	1.4	0.1275	2.6427	10	1.3	31.597	0.617	26.48	4.831	26.29
TM36	Maktau	miniature	active	C	Mar_16	24	0.04	0.25	1.4	0.1275	2.6427	10	1.3	31.214	0.96	26.21	5.129	26.48
TM36	Maktau	miniature	active	C	Mar_16	25	0.04	0.25	1.4	0.1275	2.6427	10	1.3	30.678	0.797	24.12	4.279	26.21
TM36	Maktau	miniature	active	C	Mar_16	26	0.04	0.25	1.4	0.1275	2.6427	10	1.3	30.225	0.775	24.51	4.704	24.12
TM36	Maktau	miniature	active	C	Mar_16	27	0.04	0.25	1.4	0.1275	2.6427	10	1.3	30.389	0.817	25.63	5.669	24.51
TM36	Maktau	miniature	active	C	Mar_16	28	0.04	0.25	1.4	0.1275	2.6427	10	1.3	30.988	0.815	27.04	5.613	25.63
TM36	Maktau	miniature	active	C	Mar_16	29	0.04	0.25	1.4	0.1275	2.6427	10	1.3	31.586	0.71	26.84	4.98	27.04
TM36	Maktau	miniature	active	C	Mar_16	30	0.04	0.25	1.4	0.1275	2.6427	10	1.3	31.466	0.689	26.75	4.903	26.84
TM36	Maktau	miniature	active	C	Mar_16	31	0.04	0.25	1.4	0.1275	2.6427	10	1.3	31.528	0.7	26.8	4.922	26.75
TM36	Maktau	miniature	active	C	Apr_16	1	0.04	0.25	1.4	0.1275	2.6427	10	1.3	31.372	0.584	23.6	1.852	26.8
TM36	Maktau	miniature	active	C	Apr_16	2	0.04	0.25	1.4	0.1275	2.6427	10	1.3	30.021	0.775	21.14	1.049	23.6
TM36	Maktau	miniature	active	C	Apr_16	3	0.04	0.25	1.4	0.1275	2.6427	10	1.3	27.985	0.421	22.39	2.419	21.14
TM36	Maktau	miniature	active	C	Apr_16	4	0.04	0.25	1.4	0.1275	2.6427	10	1.3	27.821	0.312	21.78	2.927	22.39
TM36	Maktau	miniature	active	C	Apr_16	5	0.04	0.25	1.4	0.1275	2.6427	10	1.3	27.041	0.589	21.91	2.777	21.78
TM36	Maktau	miniature	active	C	Apr_16	6	0.04	0.25	1.4	0.1275	2.6427	10	1.3	27.627	0.438	23.23	2.858	21.91
TM36	Maktau	miniature	active	C	Apr_16	7	0.04	0.25	1.4	0.1275	2.6427	10	1.3	28.015	0.818	23.14	4.322	23.23
TM36	Maktau	miniature	active	C	Apr_16	8	0.04	0.25	1.4	0.1275	2.6427	10	1.3	28.679	0.984	23.73	3.852	23.14
TM36	Maktau	miniature	active	C	Apr_16	9	0.04	0.25	1.4	0.1275	2.6427	10	1.3	29.123	0.829	22.65	3.831	23.73
TM36	Maktau	miniature	active	C	Apr_16	10	0.04	0.25	1.4	0.1275	2.6427	10	1.3	29.125	0.859	22.79	3.38	22.65
TM36	Maktau	miniature	active	C	Apr_16	11	0.04	0.25	1.4	0.1275	2.6427	10	1.3	29.053	0.806	22.33	2.8	22.79
TM36	Maktau	miniature	active	C	Apr_16	12	0.04	0.25	1.4	0.1275	2.6427	10	1.3	29	0.712	22.84	3.418	22.33
TM36	Maktau	miniature	active	C	Apr_16	13	0.04	0.25	1.4	0.1275	2.6427	10	1.3	29.172	0.708	22.43	2.799	22.84
TM36	Maktau	miniature	active	C	Apr_16	14	0.04	0.25	1.4	0.1275	2.6427	10	1.3	28.922	0.49	22.41	2.834	22.43
TM36	Maktau	miniature	active	C	Apr_16	15	0.04	0.25	1.4	0.1275	2.6427	10	1.3	28.562	0.657	22.64	2.81	22.41
TM36	Maktau	miniature	active	C	Apr_16	16	0.04	0.25	1.4	0.1275	2.6427	10	1.3	28.703	0.462	21.35	1.754	22.64
TM36	Maktau	miniature	active	C	Apr_16	17	0.04	0.25	1.4	0.1275	2.6427	10	1.3	28.29	0.688	22.26	2.866	21.35
TM36	Maktau	miniature	active	C	Apr_16	18	0.04	0.25	1.4	0.1275	2.6427	10	1.3	28.735	0.745	23.04	3.842	22.26
TM36	Maktau	miniature	active	C	Apr_16	19	0.04	0.25	1.4	0.1275	2.6427	10	1.3	29.53	0.84	24.12	3.978	23.04
TM36	Maktau	miniature	active	C	Apr_16	20	0.04	0.25	1.4	0.1275	2.6427	10	1.3	30.237	0.752	23.96	3.562	24.12
TM36	Maktau	miniature	active	C	Apr_16	21	0.04	0.25	1.4	0.1275	2.6427	10	1.3	30.069	0.56	22.69	2.73	23.96
TM36	Maktau	miniature	active	C	Apr_16	22	0.04	0.25	1.4	0.1275	2.6427	10	1.3	29.825	0.558	22.81	2.829	22.69
TM36	Maktau	miniature	active	C	Apr_16	23	0.04	0.25	1.4	0.1275	2.6427	10	1.3	29.42	0.605	23.57	2.962	22.81
TM36	Maktau	miniature	active	C	Apr_16	24	0.04	0.25	1.4	0.1275	2.6427	10	1.3	29.468	0.795	23.63	3.284	23.57
TM36	Maktau	miniature	active	C	Apr_16	25	0.04	0.25	1.4	0.1275	2.6427	10	1.3	29.5	0.705	22.84	2.93	23.63
TM36	Maktau	miniature	active	C	Apr_16	26	0.04	0.25	1.4	0.1275	2.6427	10	1.3	29.108	0.815	22.61	3.698	22.84
TM36	Maktau	miniature	active	C	Apr_16	27	0.04	0.25	1.4	0.1275	2.6427	10	1.3	28.758	0.641	22.2	3.34	22.61
TM36	Maktau	miniature	active	C	Apr_16	28	0.04	0.25	1.4	0.1275	2.6427	10	1.3	28.711	0.733	21.62	3.225	22.2
TM36	Maktau	miniature	active	C	Apr_16	29	0.04	0.25	1.4	0.1275	2.6427	10	1.3	29.094	0.589	21.67	2.683	21.62
TM36	Maktau	miniature	active	C	Apr_16	30	0.04	0.25	1.4	0.1275	2.6427	10	1.3	29.101	0.597	22.2	3.227	21.67
TM36	Maktau	miniature	active	C	May_16	1	0.04	0.25	1.4	0.1275	2.6427	10	1.3	29.094	0.658	22.71	3.999	22.2
TM36	Maktau	miniature	active	C	May_16	2	0.04	0.25	1.4	0.1275	2.6427	10	1.3	29.156	0.828	22.56	4.319	22.71
TM36	Maktau	miniature	active	C	May_16	3	0.04	0.25	1.4	0.1275	2.6427	10	1.3	29.623	0.804	22.82	4.201	22.56
TM36	Maktau	miniature	active	C	May_16	4	0.04	0.25	1.4	0.1275	2.6427	10	1.3	29.57	0.816	23.27	4.166	22.82
TM36	Maktau	miniature	active	C	May_16	5	0.04	0.25	1.4	0.1275	2.6427	10	1.3	29.671	0.506	21.78	1.996	23.27
TM36	Maktau	miniature	active	C	May_16	6	0.04	0.25	1.4	0.1275	2.6427	10	1.3	28.025	0.545	21.56	3.44	21.78
TM36	Maktau	miniature	active	C	May_16	7	0.04	0.25	1.4	0.1275	2.6427	10	1.3	27.961	0.85	21.09	4.205	21.56
TM36	Maktau	miniature	active	C	May_16	8	0.04	0.25	1.4	0.1275	2.6427	10	1.3	27.993	0.862	21.52	4.328	21.09
TM36	Maktau	miniature	active	C	May_16	9	0.04	0.25	1.4	0.1275	2.6427	10	1.3	28.282	0.691	20.94	4.019	21.52
TM36	Maktau	miniature	active	C	May_16	10	0.04	0.25	1.4	0.1275	2.6427	10	1.3	27.969	0.561	19.55	1.796	20.94
TM36	Maktau	miniature	active	C	May_16	11	0.04	0.25	1.4	0.1275	2.6427	10	1.3	27.048	0.503	20.98	3.553	19.55
TM36	Maktau	miniature	active	C	May_16	12	0.04	0.25	1.4	0.1275	2.6427	10	1.3	27.322	0.7	21.1	3.779	20.98
TM36	Maktau	miniature	active	C	May_16	13	0.04	0.25	1.4	0.1275	2.6427	10	1.3	28.048	0.637	20.84	3.716	21.1
TM36	Maktau	miniature	active	C	May_16	14	0.04	0.25	1.4	0.1275	2.6427	10	1.3	28.453	0.649	21.36	3.399	20.84
TM36	Maktau	miniature	active	C	May_16	15	0.04	0.25	1.4	0.1275	2.6427	10	1.3	28.375	0.811	22.06	4.524	21.36
TM36	Maktau	miniature	active	C	May_16	16	0.04	0.25	1.4	0.1275	2.6427	10	1.3	28.648	0.818	22.31	4.693	22.06
TM36	Maktau	miniature	active	C	May_16	17	0.04	0.25	1.4	0.1275	2.6427	10	1.3	29.133	0.722	23.02	4.253	22.31
TM36	Maktau	miniature	active	C	May_16	18	0.04	0.25	1.4	0.1275	2.6427	10	1.3	29.335	0.638	22.02	3.383	23.02
TM36	Maktau	miniature	active	C	May_16	19	0.04	0.25	1.4	0.1275	2.6427	10	1.3	28.695	0.628	21.05	3.703	22.02
TM36	Maktau	miniature	active	C	May_16	20	0.04	0.25	1.4	0.1275	2.6427	10	1.3	28.282	0.646	21.48	4.843	21.05
TM36	Maktau	miniature	active	C	May_16	21	0.04	0.25	1.4	0.1275	2.6427	10	1.3	28.086	0.654	19.67	1.985	21.48
TM36	Maktau	miniature	active	C	May_16	22	0.04	0.25	1.4	0.1275	2.6427	10	1.3	27.525	0.673	21.43	3.524	19.67
TM36	Maktau	miniature	active	C	May_16	23	0.04	0.25	1.4	0.1275	2.6427	10	1.3	27.696	0.68	20.1	2.993	21.43
TM36	Maktau	miniature	active	C	May_16	24	0.04	0.25	1.4	0.1275	2.6427	10	1.3	27.267	0.61	20.71	4.119	20.1
TM36	Maktau	miniature	active	C	May_16	25	0.04	0.25	1.4	0.1275	2.6427	10	1.3	27.345	0.662	21.31	4.309	20.71
TM36	Maktau	miniature	active	C	May_16	26	0.04	0.25	1.4	0.1275	2.6427	10	1.3	27.439	0.547	20.22	3.705	21.31
TM36	Maktau	miniature	active	C	May_16	27	0.04	0.25	1.4	0.1275	2.6427	10	1.3	27.134	0.773	20.55	4.209	20.22
TM36	Maktau	miniature	active	C	May_16	28	0.04	0.25	1.4	0.1275	2.6427	10	1.3	27.501	0.75	20.74	4.643	20.55
TM36	Maktau	miniature	active	C	May_16	29	0.04	0.25	1.4	0.1275	2.6427	10	1.3	27.931	0.796	20.84	4.949	20.74
TM36	Maktau	miniature	active	C	May_16	30	0.04	0.25	1.4	0.1275	2.6427	10	1.3	28.125	0.891	21.71	4.818	20.84
TM36	Maktau	miniature	active	C	May_16	31	0.04	0.25	1.4	0.1275	2.6427	10	1.3	28.391	0.703	22.43	4.546	21.71
TM36	Maktau	miniature	active	C	Jun_16	1	0.04	0.25	1.4	0.1275	2.6427	10	1.3	28.711	0.671	22.3	4.367	22.43
TM36	Maktau	miniature	active	C	Jun_16	2	0.04	0.25	1.4	0.1275	2.6427	10	1.3	28.828	0.711	22.38	4.012	22.3
TM36	Maktau	miniature	active	C	Jun_16	3	0.04	0.25	1.4	0.1275	2.6427	10	1.3	28.485	0.66	21	3.155	22.38
TM36	Maktau	miniature	active	C	Jun_16	4	0.04	0.25	1.4	0.1275	2.6427	10	1.3	28.54	0.673	21.84	4.093	21
TM36	Maktau	miniature	active	C	Jun_16	5	0.04	0.25	1.4	0.1275	2.6427	10	1.3	28.813	0.691	22.06	4.417	21.84
TM36	Maktau	miniature	active	C	Jun_16	6	0.04	0.25	1.4	0.1275	2.6427	10	1.3	28.875	0.616	21.82	4.116	22.06
TM36	Maktau	miniature	active	C	Jun_16	7	0.04	0.25	1.4	0.1275	2.6427	10	1.3	28.407	0.732	21.65	4.477	21.82
TM36	Maktau	miniature	active	C	Jun_16	8	0.04	0.25	1.4	0.1275	2.6427	10	1.3	28.235	0.775	21.01	4.912	21.65
TM36	Maktau	miniature	active	C	Jun_16	9	0.04	0.25	1.4	0.1275	2.6427	10	1.3	28.047	0.784	20.5	4.626	21.01
TM36	Maktau	miniature	active	C	Jun_16	10	0.04	0.25	1.4	0.1275	2.6427	10	1.3	27.83	0.68	20.66	4.506	20.5
TM36	Maktau	miniature	active	C	Jun_16	11	0.04	0.25	1.4	0.1275	2.6427	10	1.3	27.782	0.559	20.55	3.203	20.66
TM36	Maktau	miniature	active	C	Jun_16	12	0.04	0.25	1.4	0.1275	2.6427	10	1.3	27.65	0.475	20.93	3.098	20.55
TM36	Maktau	miniature	active	C	Jun_16	13	0.04	0.25	1.4	0.1275	2.6427	10	1.3	27.197	0.636	20.1	4.037	20.93
TM36	Maktau	miniature	active	C	Jun_16	14	0.04	0.25	1.4	0.1275	2.6427	10	1.3	26.697	0.87	20.63	5.877	20.1
TM36	Maktau	miniature	active	C	Jun_16	15	0.04	0.25	1.4	0.1275	2.6427	10	1.3	27.118	0.768	21.33	5.05	20.63
TM36	Maktau	miniature	active	C	Jun_16	16	0.04	0.25	1.4	0.1275	2.6427	10	1.3	27.822	0.578	21.26	4.16	21.33
TM36	Maktau	miniature	active	C	Jun_16	17	0.04	0.25	1.4	0.1275	2.6427	10	1.3	27.642	0.778	21.22	5.061	21.26
TM36	Maktau	miniature	active	C	Jun_16	18	0.04	0.25	1.4	0.1275	2.6427	10	1.3	28.071	0.568	21.57	3.731	21.22
TM36	Maktau	miniature	active	C	Jun_16	19	0.04	0.25	1.4	0.1275	2.6427	10	1.3	28.43	0.491	21.48	3.85	21.57
TM36	Maktau	miniature	active	C	Jun_16	20	0.04	0.25	1.4	0.1275	2.6427	10	1.3	28.5	0.581	20.84	3.191	21.48
TM36	Maktau	miniature	active	C	Jun_16	21	0.04	0.25	1.4	0.1275	2.6427	10	1.3	28.031	0.698	20.16	3.267	20.84
TM36	Maktau	miniature	active	C	Jun_16	22	0.04	0.25	1.4	0.1275	2.6427	10	1.3	27.353	0.555	19.21	1.849	20.16
TM36	Maktau	miniature	active	C	Jun_16	23	0.04	0.25	1.4	0.1275	2.6427	10	1.3	26.595	0.607	20.49	3.64	19.21
TM36	Maktau	miniature	active	C	Jun_16	24	0.04	0.25	1.4	0.1275	2.6427	10	1.3	26.822	0.46	19.56	3.248	20.49
TM36	Maktau	miniature	active	C	Jun_16	25	0.04	0.25	1.4	0.1275	2.6427	10	1.3	26.556	0.436	19.82	3.134	19.56
TM36	Maktau	miniature	active	C	Jun_16	26	0.04	0.25	1.4	0.1275	2.6427	10	1.3	26.768	0.579	20.5	3.501	19.82
TM36	Maktau	miniature	active	C	Jun_16	27	0.04	0.25	1.4	0.1275	2.6427	10	1.3	27.056	0.503	20.62	3.71	20.5
TM36	Maktau	miniature	active	C	Jun_16	28	0.04	0.25	1.4	0.1275	2.6427	10	1.3	27.158	0.692	20.83	4.843	20.62
TM36	Maktau	miniature	active	C	Jun_16	29	0.04	0.25	1.4	0.1275	2.6427	10	1.3	27.298	0.605	20.03	3.563	20.83
TM36	Maktau	miniature	active	C	Jun_16	30	0.04	0.25	1.4	0.1275	2.6427	10	1.3	27.087	0.711	20.15	4.417	20.03
TM36	Maktau	miniature	active	C	Jul_16	1	0.04	0.25	1.4	0.1275	2.6427	10	1.3	27.291	0.655	19.88	4.258	20.15
TM36	Maktau	miniature	active	C	Jul_16	2	0.04	0.25	1.4	0.1275	2.6427	10	1.3	27.314	0.503	20.31	3.403	19.88
TM36	Maktau	miniature	active	C	Jul_16	3	0.04	0.25	1.4	0.1275	2.6427	10	1.3	26.931	0.484	20.18	3.939	20.31
TM36	Maktau	miniature	active	C	Jul_16	4	0.04	0.25	1.4	0.1275	2.6427	10	1.3	26.463	0.751	19.89	5.514	20.18
TM36	Maktau	miniature	active	C	Jul_16	5	0.04	0.25	1.4	0.1275	2.6427	10	1.3	26.791	0.587	19.44	4.345	19.89
TM36	Maktau	miniature	active	C	Jul_16	6	0.04	0.25	1.4	0.1275	2.6427	10	1.3	26.69	0.515	19.06	3.391	19.44
TM36	Maktau	miniature	active	C	Jul_16	7	0.04	0.25	1.4	0.1275	2.6427	10	1.3	25.932	0.529	18.66	3.3	19.06
TM36	Maktau	miniature	active	C	Jul_16	8	0.04	0.25	1.4	0.1275	2.6427	10	1.3	25.316	0.4	18.39	3.012	18.66
TM36	Maktau	miniature	active	C	Jul_16	9	0.04	0.25	1.4	0.1275	2.6427	10	1.3	24.927	0.512	18.32	4.17	18.39
TM36	Maktau	miniature	active	C	Jul_16	10	0.04	0.25	1.4	0.1275	2.6427	10	1.3	25.237	0.408	18.63	3.257	18.32
TM36	Maktau	miniature	active	C	Jul_16	11	0.04	0.25	1.4	0.1275	2.6427	10	1.3	25.346	0.507	18.18	3.085	18.63
TM36	Maktau	miniature	active	C	Jul_16	12	0.04	0.25	1.4	0.1275	2.6427	10	1.3	25.356	0.582	17.61	2.89	18.18
TM36	Maktau	miniature	active	C	Jul_16	13	0.04	0.25	1.4	0.1275	2.6427	10	1.3	24.721	0.56	18.38	3.212	17.61
TM36	Maktau	miniature	active	C	Jul_16	14	0.04	0.25	1.4	0.1275	2.6427	10	1.3	25.299	0.652	18.88	4.681	18.38
TM36	Maktau	miniature	active	C	Jul_16	15	0.04	0.25	1.4	0.1275	2.6427	10	1.3	25.9	0.574	18.3	3.217	18.88
TM36	Maktau	miniature	active	C	Jul_16	16	0.04	0.25	1.4	0.1275	2.6427	10	1.3	26.073	0.49	19.4	3.132	18.3
TM36	Maktau	miniature	active	C	Jul_16	17	0.04	0.25	1.4	0.1275	2.6427	10	1.3	26.268	0.658	20.23	3.91	19.4
TM36	Maktau	miniature	active	C	Jul_16	18	0.04	0.25	1.4	0.1275	2.6427	10	1.3	26.588	0.516	19.11	3.37	20.23
TM36	Maktau	miniature	active	C	Jul_16	19	0.04	0.25	1.4	0.1275	2.6427	10	1.3	26.19	0.548	19.63	4.28	19.11
TM36	Maktau	miniature	active	C	Jul_16	20	0.04	0.25	1.4	0.1275	2.6427	10	1.3	26.377	0.682	19.55	5.141	19.63
TM36	Maktau	miniature	active	C	Jul_16	21	0.04	0.25	1.4	0.1275	2.6427	10	1.3	26.869	0.684	19.75	4.401	19.55
TM36	Maktau	miniature	active	C	Jul_16	22	0.04	0.25	1.4	0.1275	2.6427	10	1.3	27.314	0.739	20.45	4.583	19.75
TM36	Maktau	miniature	active	C	Jul_16	23	0.04	0.25	1.4	0.1275	2.6427	10	1.3	27.595	0.861	20.92	5.429	20.45
TM36	Maktau	miniature	active	C	Jul_16	24	0.04	0.25	1.4	0.1275	2.6427	10	1.3	27.556	0.877	20.37	4.875	20.92
TM36	Maktau	miniature	active	C	Jul_16	25	0.04	0.25	1.4	0.1275	2.6427	10	1.3	27.719	0.581	20.23	3.148	20.37
TM36	Maktau	miniature	active	C	Jul_16	26	0.04	0.25	1.4	0.1275	2.6427	10	1.3	27.298	0.737	20.24	4.69	20.23
TM36	Maktau	miniature	active	C	Jul_16	27	0.04	0.25	1.4	0.1275	2.6427	10	1.3	27.813	0.622	21.07	4.639	20.24
TM36	Maktau	miniature	active	C	Jul_16	28	0.04	0.25	1.4	0.1275	2.6427	10	1.3	27.744	0.731	20.13	4.646	21.07
TM36	Maktau	miniature	active	C	Jul_16	29	0.04	0.25	1.4	0.1275	2.6427	10	1.3	28.242	0.651	20.85	4.252	20.13
TM36	Maktau	miniature	active	C	Jul_16	30	0.04	0.25	1.4	0.1275	2.6427	10	1.3	28.156	0.781	20.44	5.177	20.85
TM36	Maktau	miniature	active	C	Jul_16	31	0.04	0.25	1.4	0.1275	2.6427	10	1.3	27.837	0.828	20.3	6.04	20.44
TM36	Maktau	miniature	active	C	Aug_16	1	0.04	0.25	1.4	0.1275	2.6427	10	1.3	27.455	0.863	20.1	4.903	20.3
TM36	Maktau	miniature	active	C	Aug_16	2	0.04	0.25	1.4	0.1275	2.6427	10	1.3	27.119	0.866	20.05	6.451	20.1
TM36	Maktau	miniature	active	C	Aug_16	3	0.04	0.25	1.4	0.1275	2.6427	10	1.3	27.431	0.853	20.26	5.908	20.05
TM36	Maktau	miniature	active	C	Aug_16	4	0.04	0.25	1.4	0.1275	2.6427	10	1.3	27.931	0.622	20.64	4.101	20.26
TM36	Maktau	miniature	active	C	Aug_16	5	0.04	0.25	1.4	0.1275	2.6427	10	1.3	27.478	0.722	18.55	3.409	20.64
TM36	Maktau	miniature	active	C	Aug_16	6	0.04	0.25	1.4	0.1275	2.6427	10	1.3	26.299	0.493	19.75	3.35	18.55
TM36	Maktau	miniature	active	C	Aug_16	7	0.04	0.25	1.4	0.1275	2.6427	10	1.3	26.44	0.451	19.21	3.765	19.75
TM36	Maktau	miniature	active	C	Aug_16	8	0.04	0.25	1.4	0.1275	2.6427	10	1.3	26.861	0.333	19.46	2.808	19.21
TM36	Maktau	miniature	active	C	Aug_16	9	0.04	0.25	1.4	0.1275	2.6427	10	1.3	26.642	0.486	18.49	1.881	19.46
TM36	Maktau	miniature	active	C	Aug_16	10	0.04	0.25	1.4	0.1275	2.6427	10	1.3	25.627	0.892	18.7	5.09	18.49
TM36	Maktau	miniature	active	C	Aug_16	11	0.04	0.25	1.4	0.1275	2.6427	10	1.3	27.01	0.735	19.6	4.064	18.7
TM36	Maktau	miniature	active	C	Aug_16	12	0.04	0.25	1.4	0.1275	2.6427	10	1.3	27.743	0.678	19.36	3.986	19.6
TM36	Maktau	miniature	active	C	Aug_16	13	0.04	0.25	1.4	0.1275	2.6427	10	1.3	28.219	0.61	20.19	3.357	19.36
TM36	Maktau	miniature	active	C	Aug_16	14	0.04	0.25	1.4	0.1275	2.6427	10	1.3	28.532	0.708	19.46	3.423	20.19
TM36	Maktau	miniature	active	C	Aug_16	15	0.04	0.25	1.4	0.1275	2.6427	10	1.3	28.625	0.594	19.38	2.605	19.46
TM36	Maktau	miniature	active	C	Aug_16	16	0.04	0.25	1.4	0.1275	2.6427	10	1.3	27.658	0.567	18.93	3.28	19.38
TM36	Maktau	miniature	active	C	Aug_16	17	0.04	0.25	1.4	0.1275	2.6427	10	1.3	27.111	0.877	20.84	4.883	18.93
TM36	Maktau	miniature	active	C	Aug_16	18	0.04	0.25	1.4	0.1275	2.6427	10	1.3	28.376	0.741	20.09	4.579	20.84
TM36	Maktau	miniature	active	C	Aug_16	19	0.04	0.25	1.4	0.1275	2.6427	10	1.3	28.867	0.765	21.04	4.841	20.09
TM36	Maktau	miniature	active	C	Aug_16	20	0.04	0.25	1.4	0.1275	2.6427	10	1.3	29.055	0.732	20.58	4.201	21.04
TM36	Maktau	miniature	active	C	Aug_16	21	0.04	0.25	1.4	0.1275	2.6427	10	1.3	28.867	0.827	19.82	5.555	20.58
TM36	Maktau	miniature	active	C	Aug_16	22	0.04	0.25	1.4	0.1275	2.6427	10	1.3	29.271	0.757	21.08	4.831	19.82
TM36	Maktau	miniature	active	C	Aug_16	23	0.04	0.25	1.4	0.1275	2.6427	10	1.3	29.232	0.807	20.64	4.584	21.08
TM36	Maktau	miniature	active	C	Aug_16	24	0.04	0.25	1.4	0.1275	2.6427	10	1.3	28.579	0.826	19.38	4.883	20.64
TM36	Maktau	miniature	active	C	Aug_16	25	0.04	0.25	1.4	0.1275	2.6427	10	1.3	28.094	0.668	18.64	4.909	19.38
TM36	Maktau	miniature	active	C	Aug_16	26	0.04	0.25	1.4	0.1275	2.6427	10	1.3	28.071	0.607	19.05	3.525	18.64
TM36	Maktau	miniature	active	C	Aug_16	27	0.04	0.25	1.4	0.1275	2.6427	10	1.3	28.063	0.639	19.51	3.79	19.05
TM36	Maktau	miniature	active	C	Aug_16	28	0.04	0.25	1.4	0.1275	2.6427	10	1.3	28.422	0.84	20.31	3.858	19.51
TM36	Maktau	miniature	active	C	Aug_16	29	0.04	0.25	1.4	0.1275	2.6427	10	1.3	28.836	0.725	18.48	3.45	20.31
TM36	Maktau	miniature	active	C	Aug_16	30	0.04	0.25	1.4	0.1275	2.6427	10	1.3	27.993	0.907	18.86	4.54	18.48
TM36	Maktau	miniature	active	C	Aug_16	31	0.04	0.25	1.4	0.1275	2.6427	10	1.3	28.024	0.789	19.68	4.775	18.86
TM36	Maktau	miniature	active	C	Sep_16	1	0.04	0.25	1.4	0.1275	2.6427	10	1.3	27.985	0.703	17.19	2.196	19.68
TM36	Maktau	miniature	active	C	Sep_16	2	0.04	0.25	1.4	0.1275	2.6427	10	1.3	27.377	0.611	18.73	3.353	17.19
TM36	Maktau	miniature	active	C	Sep_16	3	0.04	0.25	1.4	0.1275	2.6427	10	1.3	27.493	0.714	19.33	3.826	18.73
TM36	Maktau	miniature	active	C	Sep_16	4	0.04	0.25	1.4	0.1275	2.6427	10	1.3	27.977	0.769	19.75	4.37	19.33
TM36	Maktau	miniature	active	C	Sep_16	5	0.04	0.25	1.4	0.1275	2.6427	10	1.3	28.367	0.699	18.92	3.233	19.75
TM36	Maktau	miniature	active	C	Sep_16	6	0.04	0.25	1.4	0.1275	2.6427	10	1.3	27.915	0.799	19.81	3.632	18.92
TM36	Maktau	miniature	active	C	Sep_16	7	0.04	0.25	1.4	0.1275	2.6427	10	1.3	28.618	0.569	19.52	2.923	19.81
TM36	Maktau	miniature	active	C	Sep_16	8	0.04	0.25	1.4	0.1275	2.6427	10	1.3	27.728	0.908	20.53	5.917	19.52
TM36	Maktau	miniature	active	C	Sep_16	9	0.04	0.25	1.4	0.1275	2.6427	10	1.3	28.969	0.774	21.04	4.37	20.53
TM36	Maktau	miniature	active	C	Sep_16	10	0.04	0.25	1.4	0.1275	2.6427	10	1.3	28.805	0.84	18.8	3.838	21.04
TM36	Maktau	miniature	active	C	Sep_16	11	0.04	0.25	1.4	0.1275	2.6427	10	1.3	27.696	0.799	20.42	5.239	18.8
TM36	Maktau	miniature	active	C	Sep_16	12	0.04	0.25	1.4	0.1275	2.6427	10	1.3	28.875	0.728	21.34	4.56	20.42
TM36	Maktau	miniature	active	C	Sep_16	13	0.04	0.25	1.4	0.1275	2.6427	10	1.3	29.013	0.978	19.96	5.583	21.34
TM36	Maktau	miniature	active	C	Sep_16	14	0.04	0.25	1.4	0.1275	2.6427	10	1.3	28.968	0.678	19.25	2.799	19.96
TM36	Maktau	miniature	active	C	Sep_16	15	0.04	0.25	1.4	0.1275	2.6427	10	1.3	28.774	0.911	21.3	4.757	19.25
TM36	Maktau	miniature	active	C	Sep_16	16	0.04	0.25	1.4	0.1275	2.6427	10	1.3	29.367	0.707	20.86	4.164	21.3
TM36	Maktau	miniature	active	C	Sep_16	17	0.04	0.25	1.4	0.1275	2.6427	10	1.3	29.101	0.835	21.23	5.243	20.86
TM36	Maktau	miniature	active	C	Sep_16	18	0.04	0.25	1.4	0.1275	2.6427	10	1.3	29.14	0.788	20.06	4.882	21.23
TM36	Maktau	miniature	active	C	Sep_16	19	0.04	0.25	1.4	0.1275	2.6427	10	1.3	28.828	0.844	20.41	5.113	20.06
TM36	Maktau	miniature	active	C	Sep_16	20	0.04	0.25	1.4	0.1275	2.6427	10	1.3	28.602	0.839	19.76	4.752	20.41
TM36	Maktau	miniature	active	C	Sep_16	21	0.04	0.25	1.4	0.1275	2.6427	10	1.3	28.563	0.808	20.31	4.627	19.76
TM36	Maktau	miniature	active	C	Sep_16	22	0.04	0.25	1.4	0.1275	2.6427	10	1.3	28.936	0.705	20	4.635	20.31
TM36	Maktau	miniature	active	C	Sep_16	23	0.04	0.25	1.4	0.1275	2.6427	10	1.3	29.21	0.633	20.58	3.99	20
TM36	Maktau	miniature	active	C	Sep_16	24	0.04	0.25	1.4	0.1275	2.6427	10	1.3	29.094	0.634	20.71	3.641	20.58
TM36	Maktau	miniature	active	C	Sep_16	25	0.04	0.25	1.4	0.1275	2.6427	10	1.3	29.32	0.796	21.79	4.683	20.71
TM36	Maktau	miniature	active	C	Sep_16	26	0.04	0.25	1.4	0.1275	2.6427	10	1.3	29.866	0.773	21.34	4.984	21.79
TM36	Maktau	miniature	active	C	Sep_16	27	0.04	0.25	1.4	0.1275	2.6427	10	1.3	29.694	0.903	20.93	5.258	21.34
TM36	Maktau	miniature	active	C	Sep_16	28	0.04	0.25	1.4	0.1275	2.6427	10	1.3	30.09	0.643	21.41	3.669	20.93
TM36	Maktau	miniature	active	C	Sep_16	29	0.04	0.25	1.4	0.1275	2.6427	10	1.3	30.084	0.585	20.55	3.421	21.41
TM36	Maktau	miniature	active	C	Sep_16	30	0.04	0.25	1.4	0.1275	2.6427	10	1.3	29.982	0.739	21.69	4.874	20.55
TM36	Maktau	miniature	active	C	Oct_16	1	0.04	0.25	1.4	0.1275	2.6427	10	1.3	29.55	1.061	20.74	4.938	21.69
TM36	Maktau	miniature	active	C	Oct_16	2	0.04	0.25	1.4	0.1275	2.6427	10	1.3	29.257	0.786	20.28	3.846	20.74
TM36	Maktau	miniature	active	C	Oct_16	3	0.04	0.25	1.4	0.1275	2.6427	10	1.3	29.983	0.816	22.72	5.442	20.28
TM36	Maktau	miniature	active	C	Oct_16	4	0.04	0.25	1.4	0.1275	2.6427	10	1.3	30.334	0.819	22.38	4.583	22.72
TM36	Maktau	miniature	active	C	Oct_16	5	0.04	0.25	1.4	0.1275	2.6427	10	1.3	30.428	0.668	21.51	3.604	22.38
TM36	Maktau	miniature	active	C	Oct_16	6	0.04	0.25	1.4	0.1275	2.6427	10	1.3	29.842	0.726	21.29	4.597	21.51
TM36	Maktau	miniature	active	C	Oct_16	7	0.04	0.25	1.4	0.1275	2.6427	10	1.3	29.857	0.719	23.12	5.721	21.29
TM36	Maktau	miniature	active	C	Oct_16	8	0.04	0.25	1.4	0.1275	2.6427	10	1.3	30.054	0.804	22.66	6.063	23.12
TM36	Maktau	miniature	active	C	Oct_16	9	0.04	0.25	1.4	0.1275	2.6427	10	1.3	30.498	0.857	22.76	4.997	22.66
TM36	Maktau	miniature	active	C	Oct_16	10	0.04	0.25	1.4	0.1275	2.6427	10	1.3	30.732	0.742	22.04	5.186	22.76
TM36	Maktau	miniature	active	C	Oct_16	11	0.04	0.25	1.4	0.1275	2.6427	10	1.3	30.623	0.822	22.85	4.977	22.04
TM36	Maktau	miniature	active	C	Oct_16	12	0.04	0.25	1.4	0.1275	2.6427	10	1.3	30.553	0.969	21.69	5.395	22.85
TM36	Maktau	miniature	active	C	Oct_16	13	0.04	0.25	1.4	0.1275	2.6427	10	1.3	29.917	1.138	22.1	5.972	21.69
TM36	Maktau	miniature	active	C	Oct_16	14	0.04	0.25	1.4	0.1275	2.6427	10	1.3	30.077	0.894	22.17	5.112	22.1
TM36	Maktau	miniature	active	C	Oct_16	15	0.04	0.25	1.4	0.1275	2.6427	10	1.3	30.317	0.929	22.28	5.402	22.17
TM36	Maktau	miniature	active	C	Oct_16	16	0.04	0.25	1.4	0.1275	2.6427	10	1.3	30.139	0.918	21.86	5.799	22.28
TM36	Maktau	miniature	active	C	Oct_16	17	0.04	0.25	1.4	0.1275	2.6427	10	1.3	30.342	0.921	21.99	6.012	21.86
TM36	Maktau	miniature	active	C	Oct_16	18	0.04	0.25	1.4	0.1275	2.6427	10	1.3	30.604	0.958	22.41	5.204	21.99
TM36	Maktau	miniature	active	C	Oct_16	19	0.04	0.25	1.4	0.1275	2.6427	10	1.3	30.491	0.786	21.89	4.71	22.41
TM36	Maktau	miniature	active	C	Oct_16	20	0.04	0.25	1.4	0.1275	2.6427	10	1.3	29.995	0.931	21.94	5.195	21.89
TM36	Maktau	miniature	active	C	Oct_16	21	0.04	0.25	1.4	0.1275	2.6427	10	1.3	29.959	0.867	21.74	5.275	21.94
TM36	Maktau	miniature	active	C	Oct_16	22	0.04	0.25	1.4	0.1275	2.6427	10	1.3	29.911	0.99	22.26	5.941	21.74
TM36	Maktau	miniature	active	C	Oct_16	23	0.04	0.25	1.4	0.1275	2.6427	10	1.3	30.458	0.907	23	5.736	22.26
TM36	Maktau	miniature	active	C	Oct_16	24	0.04	0.25	1.4	0.1275	2.6427	10	1.3	30.584	0.798	21.97	5.13	23
TM36	Maktau	miniature	active	C	Oct_16	25	0.04	0.25	1.4	0.1275	2.6427	10	1.3	30.655	0.729	21.95	5.259	21.97
TM36	Maktau	miniature	active	C	Oct_16	26	0.04	0.25	1.4	0.1275	2.6427	10	1.3	30.725	0.598	23.06	4.374	21.95
TM36	Maktau	miniature	active	C	Oct_16	27	0.04	0.25	1.4	0.1275	2.6427	10	1.3	30.436	0.585	22.66	4.536	23.06
TM36	Maktau	miniature	active	C	Oct_16	28	0.04	0.25	1.4	0.1275	2.6427	10	1.3	30.463	0.644	22.7	5.008	22.66
TM36	Maktau	miniature	active	C	Oct_16	29	0.04	0.25	1.4	0.1275	2.6427	10	1.3	30.311	0.776	23.02	6.429	22.7
TM36	Maktau	miniature	active	C	Oct_16	30	0.04	0.25	1.4	0.1275	2.6427	10	1.3	30.299	0.834	24.17	5.087	23.02
TM36	Maktau	miniature	active	C	Oct_16	31	0.04	0.25	1.4	0.1275	2.6427	10	1.3	31.227	0.891	24.36	4.902	24.17
TM36	Maktau	miniature	active	C	Nov_16	1	0.04	0.25	1.4	0.1275	2.6427	10	1.3	31.828	0.552	24.13	4.124	24.36
TM36	Maktau	miniature	active	C	Nov_16	2	0.04	0.25	1.4	0.1275	2.6427	10	1.3	31.536	0.559	23.35	4.108	24.13
TM36	Maktau	miniature	active	C	Nov_16	3	0.04	0.25	1.4	0.1275	2.6427	10	1.3	30.857	0.623	23.41	4.684	23.35
TM36	Maktau	miniature	active	C	Nov_16	4	0.04	0.25	1.4	0.1275	2.6427	10	1.3	30.155	0.585	22.95	4.376	23.41
TM36	Maktau	miniature	active	C	Nov_16	5	0.04	0.25	1.4	0.1275	2.6427	10	1.3	29.421	0.583	22.84	4.454	22.95
TM36	Maktau	miniature	active	C	Nov_16	6	0.04	0.25	1.4	0.1275	2.6427	10	1.3	29.585	0.913	23.31	4.79	22.84
TM36	Maktau	miniature	active	C	Nov_16	7	0.04	0.25	1.4	0.1275	2.6427	10	1.3	30.303	1.019	22.69	5.299	23.31
TM36	Maktau	miniature	active	C	Nov_16	8	0.04	0.25	1.4	0.1275	2.6427	10	1.3	31.066	0.802	23.49	4.936	22.69
TM36	Maktau	miniature	active	C	Nov_16	9	0.04	0.25	1.4	0.1275	2.6427	10	1.3	31.169	0.727	23.73	4.532	23.49
TM36	Maktau	miniature	active	C	Nov_16	10	0.04	0.25	1.4	0.1275	2.6427	10	1.3	31.118	0.755	23.77	4.197	23.73
TM36	Maktau	miniature	active	C	Nov_16	11	0.04	0.25	1.4	0.1275	2.6427	10	1.3	31.232	0.627	23.79	4.256	23.77
TM36	Maktau	miniature	active	C	Nov_16	12	0.04	0.25	1.4	0.1275	2.6427	10	1.3	30.654	0.743	22.45	3.164	23.79
TM36	Maktau	miniature	active	C	Nov_16	13	0.04	0.25	1.4	0.1275	2.6427	10	1.3	29.819	0.612	23.28	4.056	22.45
TM36	Maktau	miniature	active	C	Nov_16	14	0.04	0.25	1.4	0.1275	2.6427	10	1.3	30.007	0.534	23.59	3.809	23.28
TM36	Maktau	miniature	active	C	Nov_16	15	0.04	0.25	1.4	0.1275	2.6427	10	1.3	30.42	0.636	22.73	4.305	23.59
TM36	Maktau	miniature	active	C	Nov_16	16	0.04	0.25	1.4	0.1275	2.6427	10	1.3	30.59	0.597	22.56	3.387	22.73
TM36	Maktau	miniature	active	C	Nov_16	17	0.04	0.25	1.4	0.1275	2.6427	10	1.3	30.21	0.581	23.32	4.179	22.56
TM36	Maktau	miniature	active	C	Nov_16	18	0.04	0.25	1.4	0.1275	2.6427	10	1.3	30.707	0.599	24.51	4.338	23.32
TM36	Maktau	miniature	active	C	Nov_16	19	0.04	0.25	1.4	0.1275	2.6427	10	1.3	31.162	0.509	22.78	3.494	24.51
TM36	Maktau	miniature	active	C	Nov_16	20	0.04	0.25	1.4	0.1275	2.6427	10	1.3	30.92	0.532	23.45	3.819	22.78
TM36	Maktau	miniature	active	C	Nov_16	21	0.04	0.25	1.4	0.1275	2.6427	10	1.3	30.334	0.57	23.29	4.153	23.45
TM36	Maktau	miniature	active	C	Nov_16	22	0.04	0.25	1.4	0.1275	2.6427	10	1.3	29.858	0.779	23.79	4.859	23.29
TM36	Maktau	miniature	active	C	Nov_16	23	0.04	0.25	1.4	0.1275	2.6427	10	1.3	30.436	0.705	23.19	5.088	23.79
TM36	Maktau	miniature	active	C	Nov_16	24	0.04	0.25	1.4	0.1275	2.6427	10	1.3	30.604	0.748	23.63	5.255	23.19
TM36	Maktau	miniature	active	C	Nov_16	25	0.04	0.25	1.4	0.1275	2.6427	10	1.3	30.1	0.805	23.41	4.824	23.63
TM36	Maktau	miniature	active	C	Nov_16	26	0.04	0.25	1.4	0.1275	2.6427	10	1.3	30.288	0.743	23.89	4.469	23.41
TM36	Maktau	miniature	active	C	Nov_16	27	0.04	0.25	1.4	0.1275	2.6427	10	1.3	30.397	0.609	23.2	4.237	23.89
TM36	Maktau	miniature	active	C	Nov_16	28	0.04	0.25	1.4	0.1275	2.6427	10	1.3	30.249	0.398	21.56	2.292	23.2
TM36	Maktau	miniature	active	C	Nov_16	29	0.04	0.25	1.4	0.1275	2.6427	10	1.3	29.982	0.569	22.58	2.621	21.56
TM36	Maktau	miniature	active	C	Nov_16	30	0.04	0.25	1.4	0.1275	2.6427	10	1.3	29.585	0.6	22.82	3.282	22.58
TM36	Maktau	miniature	active	C	Dec_16	1	0.04	0.25	1.4	0.1275	2.6427	10	1.3	28.813	0.566	22.82	3.358	22.82
TM36	Maktau	miniature	active	C	Dec_16	2	0.04	0.25	1.4	0.1275	2.6427	10	1.3	29.055	0.53	23.81	3.698	22.82
TM36	Maktau	miniature	active	C	Dec_16	3	0.04	0.25	1.4	0.1275	2.6427	10	1.3	29.414	0.435	22.81	2.969	23.81
TM36	Maktau	miniature	active	C	Dec_16	4	0.04	0.25	1.4	0.1275	2.6427	10	1.3	28.843	0.486	22.93	3.338	22.81
TM36	Maktau	miniature	active	C	Dec_16	5	0.04	0.25	1.4	0.1275	2.6427	10	1.3	28.594	0.526	23.43	3.859	22.93
TM36	Maktau	miniature	active	C	Dec_16	6	0.04	0.25	1.4	0.1275	2.6427	10	1.3	28.524	0.689	23.18	4.065	23.43
TM36	Maktau	miniature	active	C	Dec_16	7	0.04	0.25	1.4	0.1275	2.6427	10	1.3	29.156	0.62	23.37	3.623	23.18
TM36	Maktau	miniature	active	C	Dec_16	8	0.04	0.25	1.4	0.1275	2.6427	10	1.3	30.085	0.509	22.64	3.964	23.37
TM36	Maktau	miniature	active	C	Dec_16	9	0.04	0.25	1.4	0.1275	2.6427	10	1.3	30.416	0.611	23.48	3.975	22.64
TM36	Maktau	miniature	active	C	Dec_16	10	0.04	0.25	1.4	0.1275	2.6427	10	1.3	30.703	0.428	22.46	4.075	23.48
TM36	Maktau	miniature	active	C	Dec_16	11	0.04	0.25	1.4	0.1275	2.6427	10	1.3	30.169	0.563	22.44	3.241	22.46
TM36	Maktau	miniature	active	C	Dec_16	12	0.04	0.25	1.4	0.1275	2.6427	10	1.3	30.52	0.518	22.83	3.515	22.44
TM36	Maktau	miniature	active	C	Dec_16	13	0.04	0.25	1.4	0.1275	2.6427	10	1.3	30.35	0.598	22.54	3.578	22.83
TM36	Maktau	miniature	active	C	Dec_16	14	0.04	0.25	1.4	0.1275	2.6427	10	1.3	29.913	0.559	22.78	3.582	22.54
TM36	Maktau	miniature	active	C	Dec_16	15	0.04	0.25	1.4	0.1275	2.6427	10	1.3	30.046	0.697	23.17	4.341	22.78
TM36	Maktau	miniature	active	C	Dec_16	16	0.04	0.25	1.4	0.1275	2.6427	10	1.3	30.818	0.574	23.79	4.682	23.17
TM36	Maktau	miniature	active	C	Dec_16	17	0.04	0.25	1.4	0.1275	2.6427	10	1.3	31.07	0.553	24.28	4.57	23.79
TM36	Maktau	miniature	active	C	Dec_16	18	0.04	0.25	1.4	0.1275	2.6427	10	1.3	30.787	0.557	24.13	3.967	24.28
TM36	Maktau	miniature	active	C	Dec_16	19	0.04	0.25	1.4	0.1275	2.6427	10	1.3	30.594	0.609	23.88	4.031	24.13
TM36	Maktau	miniature	active	C	Dec_16	20	0.04	0.25	1.4	0.1275	2.6427	10	1.3	30.132	0.644	24.53	4.221	23.88
TM36	Maktau	miniature	active	C	Dec_16	21	0.04	0.25	1.4	0.1275	2.6427	10	1.3	30.186	0.542	23.88	3.873	24.53
TM36	Maktau	miniature	active	C	Dec_16	22	0.04	0.25	1.4	0.1275	2.6427	10	1.3	29.765	0.585	23.83	3.954	23.88
TM36	Maktau	miniature	active	C	Dec_16	23	0.04	0.25	1.4	0.1275	2.6427	10	1.3	29.662	0.632	23.25	4.482	23.83
TM36	Maktau	miniature	active	C	Dec_16	24	0.04	0.25	1.4	0.1275	2.6427	10	1.3	28.852	0.758	23.24	3.609	23.25
TM36	Maktau	miniature	active	C	Dec_16	25	0.04	0.25	1.4	0.1275	2.6427	10	1.3	28.547	0.552	23.73	4.414	23.24
TM36	Maktau	miniature	active	C	Dec_16	26	0.04	0.25	1.4	0.1275	2.6427	10	1.3	28.766	0.522	24.32	4.019	23.73
TM36	Maktau	miniature	active	C	Dec_16	27	0.04	0.25	1.4	0.1275	2.6427	10	1.3	28.329	0.45	24.3	4.135	24.32
TM36	Maktau	miniature	active	C	Dec_16	28	0.04	0.25	1.4	0.1275	2.6427	10	1.3	29.037	0.695	24.37	5.312	24.3
TM36	Maktau	miniature	active	C	Dec_16	29	0.04	0.25	1.4	0.1275	2.6427	10	1.3	29.952	0.52	23.05	4.643	24.37
TM36	Maktau	miniature	active	C	Dec_16	30	0.04	0.25	1.4	0.1275	2.6427	10	1.3	29.865	0.392	22.59	2.783	23.05
TM36	Maktau	miniature	active	C	Dec_16	31	0.04	0.25	1.4	0.1275	2.6427	10	1.3	28.891	0.426	23.45	3.575	22.59
TM36	Maktau	miniature	active	C	Jan_17	1	0.04	0.25	1.4	0.1275	2.6427	10	1.3	28.555	0.522	22.7	3.169	23.45
TM36	Maktau	miniature	active	C	Jan_17	2	0.04	0.25	1.4	0.1275	2.6427	10	1.3	28.281	0.607	24.15	4.251	22.7
TM36	Maktau	miniature	active	C	Jan_17	3	0.04	0.25	1.4	0.1275	2.6427	10	1.3	28.438	0.658	24.22	4.063	24.15
TM36	Maktau	miniature	active	C	Jan_17	4	0.04	0.25	1.4	0.1275	2.6427	10	1.3	28.914	0.547	23.97	4.114	24.22
TM36	Maktau	miniature	active	C	Jan_17	5	0.04	0.25	1.4	0.1275	2.6427	10	1.3	28.75	0.679	23.66	4.371	23.97
TM36	Maktau	miniature	active	C	Jan_17	6	0.04	0.25	1.4	0.1275	2.6427	10	1.3	29.289	0.634	23.87	4.556	23.66
TM36	Maktau	miniature	active	C	Jan_17	7	0.04	0.25	1.4	0.1275	2.6427	10	1.3	29.336	0.766	24.76	5.18	23.87
TM36	Maktau	miniature	active	C	Jan_17	8	0.04	0.25	1.4	0.1275	2.6427	10	1.3	29.763	0.694	25.61	4.724	24.76
TM36	Maktau	miniature	active	C	Jan_17	9	0.04	0.25	1.4	0.1275	2.6427	10	1.3	29.702	0.567	24.83	3.582	25.61
TM36	Maktau	miniature	active	C	Jan_17	10	0.04	0.25	1.4	0.1275	2.6427	10	1.3	29.421	0.485	23.45	3.675	24.83
TM36	Maktau	miniature	active	C	Jan_17	11	0.04	0.25	1.4	0.1275	2.6427	10	1.3	28.554	0.762	23.12	4.144	23.45
TM36	Maktau	miniature	active	C	Jan_17	12	0.04	0.25	1.4	0.1275	2.6427	10	1.3	28.156	0.853	23.68	4.889	23.12
TM36	Maktau	miniature	active	C	Jan_17	13	0.04	0.25	1.4	0.1275	2.6427	10	1.3	28.508	0.778	24.29	5.014	23.68
TM36	Maktau	miniature	active	C	Jan_17	14	0.04	0.25	1.4	0.1275	2.6427	10	1.3	29.132	0.838	25.13	5.111	24.29
TM36	Maktau	miniature	active	C	Jan_17	15	0.04	0.25	1.4	0.1275	2.6427	10	1.3	29.615	0.807	24.91	4.904	25.13
TM36	Maktau	miniature	active	C	Jan_17	16	0.04	0.25	1.4	0.1275	2.6427	10	1.3	29.812	0.72	23.59	4.84	24.91
TM36	Maktau	miniature	active	C	Jan_17	17	0.04	0.25	1.4	0.1275	2.6427	10	1.3	29.726	0.603	23.43	4.614	23.59
TM36	Maktau	miniature	active	C	Jan_17	18	0.04	0.25	1.4	0.1275	2.6427	10	1.3	29.57	0.695	24.41	4.222	23.43
TM36	Maktau	miniature	active	C	Jan_17	19	0.04	0.25	1.4	0.1275	2.6427	10	1.3	29.905	0.751	25.34	4.844	24.41
TM36	Maktau	miniature	active	C	Jan_17	20	0.04	0.25	1.4	0.1275	2.6427	10	1.3	30.319	0.749	24.74	5.107	25.34
TM36	Maktau	miniature	active	C	Jan_17	21	0.04	0.25	1.4	0.1275	2.6427	10	1.3	30.256	0.677	24.58	4.469	24.74
TM36	Maktau	miniature	active	C	Jan_17	22	0.04	0.25	1.4	0.1275	2.6427	10	1.3	30.124	0.575	24.22	4.147	24.58
TM36	Maktau	miniature	active	C	Jan_17	23	0.04	0.25	1.4	0.1275	2.6427	10	1.3	29.749	0.679	23.75	4.432	24.22
TM36	Maktau	miniature	active	C	Jan_17	24	0.04	0.25	1.4	0.1275	2.6427	10	1.3	29.734	0.851	24.81	5.889	23.75
TM36	Maktau	miniature	active	C	Jan_17	25	0.04	0.25	1.4	0.1275	2.6427	10	1.3	30.272	0.779	25.34	5.163	24.81
TM36	Maktau	miniature	active	C	Jan_17	26	0.04	0.25	1.4	0.1275	2.6427	10	1.3	30.249	0.755	24.67	5.171	25.34
TM36	Maktau	miniature	active	C	Jan_17	27	0.04	0.25	1.4	0.1275	2.6427	10	1.3	30.327	0.694	25.4	4.423	24.67
TM36	Maktau	miniature	active	C	Jan_17	28	0.04	0.25	1.4	0.1275	2.6427	10	1.3	30.541	0.824	25.03	4.238	25.4
TM36	Maktau	miniature	active	C	Jan_17	29	0.04	0.25	1.4	0.1275	2.6427	10	1.3	30.553	0.72	25.55	4.544	25.03
TM36	Maktau	miniature	active	C	Jan_17	30	0.04	0.25	1.4	0.1275	2.6427	10	1.3	30.537	0.637	25.94	4.631	25.55
TM36	Maktau	miniature	active	C	Jan_17	31	0.04	0.25	1.4	0.1275	2.6427	10	1.3	30.38	0.438	23.51	2.629	25.94
TM36	Maktau	miniature	active	C	Feb_17	1	0.04	0.25	1.4	0.1275	2.6427	10	1.3	29.453	0.725	24.51	4.589	23.51
TM36	Maktau	miniature	active	C	Feb_17	2	0.04	0.25	1.4	0.1275	2.6427	10	1.3	29.913	0.744	24.78	4.552	24.51
TM36	Maktau	miniature	active	C	Feb_17	3	0.04	0.25	1.4	0.1275	2.6427	10	1.3	30.264	0.796	25.57	5.118	24.78
TM36	Maktau	miniature	active	C	Feb_17	4	0.04	0.25	1.4	0.1275	2.6427	10	1.3	30.809	0.641	25.05	4.39	25.57
TM36	Maktau	miniature	active	C	Feb_17	5	0.04	0.25	1.4	0.1275	2.6427	10	1.3	30.762	0.683	23.96	4.514	25.05
TM36	Maktau	miniature	active	C	Feb_17	6	0.04	0.25	1.4	0.1275	2.6427	10	1.3	30.497	0.631	23.33	4.289	23.96
TM36	Maktau	miniature	active	C	Feb_17	7	0.04	0.25	1.4	0.1275	2.6427	10	1.3	30.28	0.612	24.18	4.204	23.33
TM36	Maktau	miniature	active	C	Feb_17	8	0.04	0.25	1.4	0.1275	2.6427	10	1.3	30.218	0.653	23.83	3.981	24.18
TM36	Maktau	miniature	active	C	Feb_17	9	0.04	0.25	1.4	0.1275	2.6427	10	1.3	29.812	0.642	24	4.148	23.83
TM36	Maktau	miniature	active	C	Feb_17	10	0.04	0.25	1.4	0.1275	2.6427	10	1.3	29.671	0.554	23.5	3.595	24
TM36	Maktau	miniature	active	C	Feb_17	11	0.04	0.25	1.4	0.1275	2.6427	10	1.3	29.601	0.666	23.6	4.798	23.5
TM36	Maktau	miniature	active	C	Feb_17	12	0.04	0.25	1.4	0.1275	2.6427	10	1.3	29.944	0.79	23.83	6.749	23.6
TM36	Maktau	miniature	active	C	Feb_17	13	0.04	0.25	1.4	0.1275	2.6427	10	1.3	30.643	0.833	24.34	5.381	23.83
TM36	Maktau	miniature	active	C	Feb_17	14	0.04	0.25	1.4	0.1275	2.6427	10	1.3	30.99	0.684	24.5	4.38	24.34
TM36	Maktau	miniature	active	C	Feb_17	15	0.04	0.25	1.4	0.1275	2.6427	10	1.3	30.74	0.805	24.53	5.16	24.5
TM36	Maktau	miniature	active	C	Feb_17	16	0.04	0.25	1.4	0.1275	2.6427	10	1.3	30.608	0.801	24.03	5.625	24.53
TM36	Maktau	miniature	active	C	Feb_17	17	0.04	0.25	1.4	0.1275	2.6427	10	1.3	30.779	0.737	25.01	5.63	24.03
TM36	Maktau	miniature	active	C	Feb_17	18	0.04	0.25	1.4	0.1275	2.6427	10	1.3	30.732	0.773	24.93	4.821	25.01
TM36	Maktau	miniature	active	C	Feb_17	19	0.04	0.25	1.4	0.1275	2.6427	10	1.3	30.588	0.813	24.45	4.714	24.93
TM36	Maktau	miniature	active	C	Feb_17	20	0.04	0.25	1.4	0.1275	2.6427	10	1.3	30.225	0.8	23.58	3.719	24.45
TM36	Maktau	miniature	active	C	Feb_17	21	0.04	0.25	1.4	0.1275	2.6427	10	1.3	29.195	0.802	24.54	4.684	23.58
TM36	Maktau	miniature	active	C	Feb_17	22	0.04	0.25	1.4	0.1275	2.6427	10	1.3	29.647	0.515	24.03	3.938	24.54
TM36	Maktau	miniature	active	C	Feb_17	23	0.04	0.25	1.4	0.1275	2.6427	10	1.3	29.616	0.751	25.26	3.907	24.03
TM36	Maktau	miniature	active	C	Feb_17	24	0.04	0.25	1.4	0.1275	2.6427	10	1.3	30.093	0.682	25.35	4.045	25.26
TM36	Maktau	miniature	active	C	Feb_17	25	0.04	0.25	1.4	0.1275	2.6427	10	1.3	30.213	0.877	25.01	4.77	25.35
TM36	Maktau	miniature	active	C	Feb_17	26	0.04	0.25	1.4	0.1275	2.6427	10	1.3	30.2	0.813	24.8	5.238	25.01
TM36	Maktau	miniature	active	C	Feb_17	27	0.04	0.25	1.4	0.1275	2.6427	10	1.3	30.362	0.799	25.25	4.481	24.8
TM36	Maktau	miniature	active	C	Feb_17	28	0.04	0.25	1.4	0.1275	2.6427	10	1.3	30.374	0.68	24.96	4.359	25.25
TM36	Maktau	miniature	active	C	Mar_17	1	0.04	0.25	1.4	0.1275	2.6427	10	1.3	30.006	0.528	24.36	3.972	24.96
TM36	Maktau	miniature	active	C	Mar_17	2	0.04	0.25	1.4	0.1275	2.6427	10	1.3	29.546	0.949	23.97	5.604	24.36
TM36	Maktau	miniature	active	C	Mar_17	3	0.04	0.25	1.4	0.1275	2.6427	10	1.3	30.537	0.847	24.76	5.374	23.97
TM36	Maktau	miniature	active	C	Mar_17	4	0.04	0.25	1.4	0.1275	2.6427	10	1.3	29.881	0.818	23.35	3.669	24.76
TM36	Maktau	miniature	active	C	Mar_17	5	0.04	0.25	1.4	0.1275	2.6427	10	1.3	29.013	0.888	25.59	5.689	23.35
TM36	Maktau	miniature	active	C	Mar_17	6	0.04	0.25	1.4	0.1275	2.6427	10	1.3	29.585	0.932	26.55	5.668	25.59
TM36	Maktau	miniature	active	C	Mar_17	7	0.04	0.25	1.4	0.1275	2.6427	10	1.3	30.483	0.813	27.22	5.503	26.55
TM36	Maktau	miniature	active	C	Mar_17	8	0.04	0.25	1.4	0.1275	2.6427	10	1.3	30.685	0.933	25.83	5.799	27.22
TM36	Maktau	miniature	active	C	Mar_17	9	0.04	0.25	1.4	0.1275	2.6427	10	1.3	30.982	0.809	25.9	5.733	25.83
TM36	Maktau	miniature	active	C	Mar_17	10	0.04	0.25	1.4	0.1275	2.6427	10	1.3	31.232	0.903	26.86	5.059	25.9
TM36	Maktau	miniature	active	C	Mar_17	11	0.04	0.25	1.4	0.1275	2.6427	10	1.3	31.051	0.812	25.19	4.89	26.86
TM36	Maktau	miniature	active	C	Mar_17	12	0.04	0.25	1.4	0.1275	2.6427	10	1.3	30.668	0.489	24.26	4.622	25.19
TM36	Maktau	miniature	active	C	Mar_17	13	0.04	0.25	1.4	0.1275	2.6427	10	1.3	30.553	0.98	25.68	6.043	24.26
TM36	Maktau	miniature	active	C	Mar_17	14	0.04	0.25	1.4	0.1275	2.6427	10	1.3	31.458	0.669	25.12	4.842	25.68
TM36	Maktau	miniature	active	C	Mar_17	15	0.04	0.25	1.4	0.1275	2.6427	10	1.3	31.149	0.865	25.65	4.516	25.12
TM36	Maktau	miniature	active	C	Mar_17	16	0.04	0.25	1.4	0.1275	2.6427	10	1.3	31.254	0.778	25.46	5.104	25.65
TM36	Maktau	miniature	active	C	Mar_17	17	0.04	0.25	1.4	0.1275	2.6427	10	1.3	31.254	0.685	24.56	5.413	25.46
TM36	Maktau	miniature	active	C	Mar_17	18	0.04	0.25	1.4	0.1275	2.6427	10	1.3	29.687	0.827	22.52	3.232	24.56
TM36	Maktau	miniature	active	C	Mar_17	19	0.04	0.25	1.4	0.1275	2.6427	10	1.3	28.462	0.604	24.42	3.989	22.52
TM36	Maktau	miniature	active	C	Mar_17	20	0.04	0.25	1.4	0.1275	2.6427	10	1.3	28.571	1.045	24.3	4.401	24.42
TM36	Maktau	miniature	active	C	Mar_17	21	0.04	0.25	1.4	0.1275	2.6427	10	1.3	29.609	1.006	25	3.975	24.3
TM36	Maktau	miniature	active	C	Mar_17	22	0.04	0.25	1.4	0.1275	2.6427	10	1.3	30.19	0.953	24.64	4.032	25
TM36	Maktau	miniature	active	C	Mar_17	23	0.04	0.25	1.4	0.1275	2.6427	10	1.3	29.866	0.803	23.77	3.977	24.64
TM36	Maktau	miniature	active	C	Mar_17	24	0.04	0.25	1.4	0.1275	2.6427	10	1.3	29.617	0.808	24.56	4.218	23.77
TM36	Maktau	miniature	active	C	Mar_17	25	0.04	0.25	1.4	0.1275	2.6427	10	1.3	30.358	0.827	25.85	4.456	24.56
TM36	Maktau	miniature	active	C	Mar_17	26	0.04	0.25	1.4	0.1275	2.6427	10	1.3	30.676	0.609	25.72	4.243	25.85
TM36	Maktau	miniature	active	C	Mar_17	27	0.04	0.25	1.4	0.1275	2.6427	10	1.3	30.147	0.547	24.35	3.353	25.72
TM36	Maktau	miniature	active	C	Mar_17	28	0.04	0.25	1.4	0.1275	2.6427	10	1.3	29.218	0.695	24.22	3.828	24.35
TM36	Maktau	miniature	active	C	Mar_17	29	0.04	0.25	1.4	0.1275	2.6427	10	1.3	29.023	0.706	22.55	3.838	24.22
TM36	Maktau	miniature	active	C	Mar_17	30	0.04	0.25	1.4	0.1275	2.6427	10	1.3	29.624	0.616	24.15	4.364	22.55
TM36	Maktau	miniature	active	C	Mar_17	31	0.04	0.25	1.4	0.1275	2.6427	10	1.3	29.874	0.726	24.02	4.141	24.15
TR09	Kasigau Road	miniature	active	C	Mar_16	1	1.07	0.2	1.3	0.0956	2.2632	6	0.8	30.431	0.261	23.43	3.973	22.89
TR09	Kasigau Road	miniature	active	C	Mar_16	2	1.07	0.2	1.3	0.0956	2.2632	6	0.8	29.901	0.435	24.92	5.164	23.43
TR09	Kasigau Road	miniature	active	C	Mar_16	3	1.07	0.2	1.3	0.0956	2.2632	6	0.8	30.433	0.528	24.8	3.991	24.92
TR09	Kasigau Road	miniature	active	C	Mar_16	4	1.07	0.2	1.3	0.0956	2.2632	6	0.8	30.527	0.551	25.01	4.385	24.8
TR09	Kasigau Road	miniature	active	C	Mar_16	5	1.07	0.2	1.3	0.0956	2.2632	6	0.8	30.455	0.59	24.28	5.121	25.01
TR09	Kasigau Road	miniature	active	C	Mar_16	6	1.07	0.2	1.3	0.0956	2.2632	6	0.8	31.003	0.513	25.24	5.036	24.28
TR09	Kasigau Road	miniature	active	C	Mar_16	7	1.07	0.2	1.3	0.0956	2.2632	6	0.8	31.155	0.496	25.41	4.452	25.24
TR09	Kasigau Road	miniature	active	C	Mar_16	8	1.07	0.2	1.3	0.0956	2.2632	6	0.8	30.845	0.428	25.67	5.154	25.41
TR09	Kasigau Road	miniature	active	C	Mar_16	9	1.07	0.2	1.3	0.0956	2.2632	6	0.8	31.149	0.352	24.48	3.963	25.67
TR09	Kasigau Road	miniature	active	C	Mar_16	10	1.07	0.2	1.3	0.0956	2.2632	6	0.8	30.357	0.844	22.8	4.435	24.48
TR09	Kasigau Road	miniature	active	C	Mar_16	11	1.07	0.2	1.3	0.0956	2.2632	6	0.8	29.7	0.224	25.63	4.472	22.8
TR09	Kasigau Road	miniature	active	C	Mar_16	12	1.07	0.2	1.3	0.0956	2.2632	6	0.8	29.455	0.28	25.95	4.289	25.63
TR09	Kasigau Road	miniature	active	C	Mar_16	13	1.07	0.2	1.3	0.0956	2.2632	6	0.8	29.53	0.515	24.95	6.024	25.95
TR09	Kasigau Road	miniature	active	C	Mar_16	14	1.07	0.2	1.3	0.0956	2.2632	6	0.8	30.025	0.41	25.95	4.829	24.95
TR09	Kasigau Road	miniature	active	C	Mar_16	15	1.07	0.2	1.3	0.0956	2.2632	6	0.8	29.997	0.393	25.48	5.016	25.95
TR09	Kasigau Road	miniature	active	C	Mar_16	16	1.07	0.2	1.3	0.0956	2.2632	6	0.8	30.425	0.308	25.93	5.507	25.48
TR09	Kasigau Road	miniature	active	C	Mar_16	17	1.07	0.2	1.3	0.0956	2.2632	6	0.8	30.627	0.347	25.44	4.363	25.93
TR09	Kasigau Road	miniature	active	C	Mar_16	18	1.07	0.2	1.3	0.0956	2.2632	6	0.8	30.663	0.337	26.16	3.938	25.44
TR09	Kasigau Road	miniature	active	C	Mar_16	19	1.07	0.2	1.3	0.0956	2.2632	6	0.8	30.499	0.496	25.19	4.529	26.16
TR09	Kasigau Road	miniature	active	C	Mar_16	20	1.07	0.2	1.3	0.0956	2.2632	6	0.8	30.68	0.446	26.1	4.998	25.19
TR09	Kasigau Road	miniature	active	C	Mar_16	21	1.07	0.2	1.3	0.0956	2.2632	6	0.8	30.758	0.462	26.15	4.351	26.1
TR09	Kasigau Road	miniature	active	C	Mar_16	22	1.07	0.2	1.3	0.0956	2.2632	6	0.8	30.665	0.44	26.29	4.692	26.15
TR09	Kasigau Road	miniature	active	C	Mar_16	23	1.07	0.2	1.3	0.0956	2.2632	6	0.8	30.871	0.467	26.48	4.831	26.29
TR09	Kasigau Road	miniature	active	C	Mar_16	24	1.07	0.2	1.3	0.0956	2.2632	6	0.8	30.761	0.582	26.21	5.129	26.48
TR09	Kasigau Road	miniature	active	C	Mar_16	25	1.07	0.2	1.3	0.0956	2.2632	6	0.8	30.223	0.567	24.12	4.279	26.21
TR09	Kasigau Road	miniature	active	C	Mar_16	26	1.07	0.2	1.3	0.0956	2.2632	6	0.8	29.716	0.535	24.51	4.704	24.12
TR09	Kasigau Road	miniature	active	C	Mar_16	27	1.07	0.2	1.3	0.0956	2.2632	6	0.8	30.348	0.52	25.63	5.669	24.51
TR09	Kasigau Road	miniature	active	C	Mar_16	28	1.07	0.2	1.3	0.0956	2.2632	6	0.8	31.027	0.498	27.04	5.613	25.63
TR09	Kasigau Road	miniature	active	C	Mar_16	29	1.07	0.2	1.3	0.0956	2.2632	6	0.8	31.503	0.414	26.84	4.98	27.04
TR09	Kasigau Road	miniature	active	C	Mar_16	30	1.07	0.2	1.3	0.0956	2.2632	6	0.8	31.204	0.538	26.75	4.903	26.84
TR09	Kasigau Road	miniature	active	C	Mar_16	31	1.07	0.2	1.3	0.0956	2.2632	6	0.8	31.3	0.41	26.8	4.922	26.75
TR09	Kasigau Road	miniature	active	C	Apr_16	1	1.07	0.2	1.3	0.0956	2.2632	6	0.8	31.015	0.517	23.6	1.852	26.8
TR09	Kasigau Road	miniature	active	C	Apr_16	2	1.07	0.2	1.3	0.0956	2.2632	6	0.8	30.658	0.545	21.14	1.049	23.6
TR09	Kasigau Road	miniature	active	C	Apr_16	3	1.07	0.2	1.3	0.0956	2.2632	6	0.8	28.869	0.382	22.39	2.419	21.14
TR09	Kasigau Road	miniature	active	C	Apr_16	4	1.07	0.2	1.3	0.0956	2.2632	6	0.8	28.592	0.165	21.78	2.927	22.39
TR09	Kasigau Road	miniature	active	C	Apr_16	5	1.07	0.2	1.3	0.0956	2.2632	6	0.8	29.036	0.374	21.91	2.777	21.78
TR09	Kasigau Road	miniature	active	C	Apr_16	6	1.07	0.2	1.3	0.0956	2.2632	6	0.8	29.15	0.26	23.23	2.858	21.91
TR09	Kasigau Road	miniature	active	C	Apr_16	7	1.07	0.2	1.3	0.0956	2.2632	6	0.8	29.063	0.476	23.14	4.322	23.23
TR09	Kasigau Road	miniature	active	C	Apr_16	8	1.07	0.2	1.3	0.0956	2.2632	6	0.8	29.81	0.35	23.73	3.852	23.14
TR09	Kasigau Road	miniature	active	C	Apr_16	9	1.07	0.2	1.3	0.0956	2.2632	6	0.8	29.887	0.442	22.65	3.831	23.73
TR09	Kasigau Road	miniature	active	C	Apr_16	10	1.07	0.2	1.3	0.0956	2.2632	6	0.8	29.69	0.426	22.79	3.38	22.65
TR09	Kasigau Road	miniature	active	C	Apr_16	11	1.07	0.2	1.3	0.0956	2.2632	6	0.8	29.683	0.371	22.33	2.8	22.79
TR09	Kasigau Road	miniature	active	C	Apr_16	12	1.07	0.2	1.3	0.0956	2.2632	6	0.8	29.492	0.272	22.84	3.418	22.33
TR09	Kasigau Road	miniature	active	C	Apr_16	13	1.07	0.2	1.3	0.0956	2.2632	6	0.8	29.488	0.304	22.43	2.799	22.84
TR09	Kasigau Road	miniature	active	C	Apr_16	14	1.07	0.2	1.3	0.0956	2.2632	6	0.8	29.645	0.417	22.41	2.834	22.43
TR09	Kasigau Road	miniature	active	C	Apr_16	15	1.07	0.2	1.3	0.0956	2.2632	6	0.8	29.869	0.5	22.64	2.81	22.41
TR09	Kasigau Road	miniature	active	C	Apr_16	16	1.07	0.2	1.3	0.0956	2.2632	6	0.8	29.378	0.626	21.35	1.754	22.64
TR09	Kasigau Road	miniature	active	C	Apr_16	17	1.07	0.2	1.3	0.0956	2.2632	6	0.8	28.437	0.411	22.26	2.866	21.35
TR09	Kasigau Road	miniature	active	C	Apr_16	18	1.07	0.2	1.3	0.0956	2.2632	6	0.8	28.584	0.485	23.04	3.842	22.26
TR09	Kasigau Road	miniature	active	C	Apr_16	19	1.07	0.2	1.3	0.0956	2.2632	6	0.8	28.934	0.495	24.12	3.978	23.04
TR09	Kasigau Road	miniature	active	C	Apr_16	20	1.07	0.2	1.3	0.0956	2.2632	6	0.8	29.143	0.385	23.96	3.562	24.12
TR09	Kasigau Road	miniature	active	C	Apr_16	21	1.07	0.2	1.3	0.0956	2.2632	6	0.8	29.18	0.413	22.69	2.73	23.96
TR09	Kasigau Road	miniature	active	C	Apr_16	22	1.07	0.2	1.3	0.0956	2.2632	6	0.8	29.131	0.42	22.81	2.829	22.69
TR09	Kasigau Road	miniature	active	C	Apr_16	23	1.07	0.2	1.3	0.0956	2.2632	6	0.8	29.283	0.264	23.57	2.962	22.81
TR09	Kasigau Road	miniature	active	C	Apr_16	24	1.07	0.2	1.3	0.0956	2.2632	6	0.8	29.055	0.497	23.63	3.284	23.57
TR09	Kasigau Road	miniature	active	C	Apr_16	25	1.07	0.2	1.3	0.0956	2.2632	6	0.8	28.175	0.666	22.84	2.93	23.63
TR09	Kasigau Road	miniature	active	C	Apr_16	26	1.07	0.2	1.3	0.0956	2.2632	6	0.8	28.162	0.377	22.61	3.698	22.84
TR09	Kasigau Road	miniature	active	C	Apr_16	27	1.07	0.2	1.3	0.0956	2.2632	6	0.8	27.477	0.68	22.2	3.34	22.61
TR09	Kasigau Road	miniature	active	C	Apr_16	28	1.07	0.2	1.3	0.0956	2.2632	6	0.8	27.109	0.306	21.62	3.225	22.2
TR09	Kasigau Road	miniature	active	C	Apr_16	29	1.07	0.2	1.3	0.0956	2.2632	6	0.8	27.125	0.401	21.67	2.683	21.62
TR09	Kasigau Road	miniature	active	C	Apr_16	30	1.07	0.2	1.3	0.0956	2.2632	6	0.8	27.601	0.296	22.2	3.227	21.67
TR09	Kasigau Road	miniature	active	C	May_16	1	1.07	0.2	1.3	0.0956	2.2632	6	0.8	28.179	0.393	22.71	3.999	22.2
TR09	Kasigau Road	miniature	active	C	May_16	2	1.07	0.2	1.3	0.0956	2.2632	6	0.8	28.531	0.379	22.56	4.319	22.71
TR09	Kasigau Road	miniature	active	C	May_16	3	1.07	0.2	1.3	0.0956	2.2632	6	0.8	28.773	0.394	22.82	4.201	22.56
TR09	Kasigau Road	miniature	active	C	May_16	4	1.07	0.2	1.3	0.0956	2.2632	6	0.8	29.043	0.487	23.27	4.166	22.82
TR09	Kasigau Road	miniature	active	C	May_16	5	1.07	0.2	1.3	0.0956	2.2632	6	0.8	29.379	0.372	21.78	1.996	23.27
TR09	Kasigau Road	miniature	active	C	May_16	6	1.07	0.2	1.3	0.0956	2.2632	6	0.8	27.913	0.666	21.56	3.44	21.78
TR09	Kasigau Road	miniature	active	C	May_16	7	1.07	0.2	1.3	0.0956	2.2632	6	0.8	27.108	0.481	21.09	4.205	21.56
TR09	Kasigau Road	miniature	active	C	May_16	8	1.07	0.2	1.3	0.0956	2.2632	6	0.8	27	0.563	21.52	4.328	21.09
TR09	Kasigau Road	miniature	active	C	May_16	9	1.07	0.2	1.3	0.0956	2.2632	6	0.8	27.57	0.72	20.94	4.019	21.52
TR09	Kasigau Road	miniature	active	C	May_16	10	1.07	0.2	1.3	0.0956	2.2632	6	0.8	27.367	0.265	19.55	1.796	20.94
TR09	Kasigau Road	miniature	active	C	May_16	11	1.07	0.2	1.3	0.0956	2.2632	6	0.8	26.914	0.348	20.98	3.553	19.55
TR09	Kasigau Road	miniature	active	C	May_16	12	1.07	0.2	1.3	0.0956	2.2632	6	0.8	27.241	0.44	21.1	3.779	20.98
TR09	Kasigau Road	miniature	active	C	May_16	13	1.07	0.2	1.3	0.0956	2.2632	6	0.8	27.85	0.537	20.84	3.716	21.1
TR09	Kasigau Road	miniature	active	C	May_16	14	1.07	0.2	1.3	0.0956	2.2632	6	0.8	28.046	0.478	21.36	3.399	20.84
TR09	Kasigau Road	miniature	active	C	May_16	15	1.07	0.2	1.3	0.0956	2.2632	6	0.8	28.21	0.346	22.06	4.524	21.36
TR09	Kasigau Road	miniature	active	C	May_16	16	1.07	0.2	1.3	0.0956	2.2632	6	0.8	28.752	0.481	22.31	4.693	22.06
TR09	Kasigau Road	miniature	active	C	May_16	17	1.07	0.2	1.3	0.0956	2.2632	6	0.8	29.3	0.609	23.02	4.253	22.31
TR09	Kasigau Road	miniature	active	C	May_16	18	1.07	0.2	1.3	0.0956	2.2632	6	0.8	29.38	0.44	22.02	3.383	23.02
TR09	Kasigau Road	miniature	active	C	May_16	19	1.07	0.2	1.3	0.0956	2.2632	6	0.8	28.459	0.602	21.05	3.703	22.02
TR09	Kasigau Road	miniature	active	C	May_16	20	1.07	0.2	1.3	0.0956	2.2632	6	0.8	28.024	0.531	21.48	4.843	21.05
TR09	Kasigau Road	miniature	active	C	May_16	21	1.07	0.2	1.3	0.0956	2.2632	6	0.8	28.193	0.434	19.67	1.985	21.48
TR09	Kasigau Road	miniature	active	C	May_16	22	1.07	0.2	1.3	0.0956	2.2632	6	0.8	27.507	0.363	21.43	3.524	19.67
TR09	Kasigau Road	miniature	active	C	May_16	23	1.07	0.2	1.3	0.0956	2.2632	6	0.8	27.43	0.472	20.1	2.993	21.43
TR09	Kasigau Road	miniature	active	C	May_16	24	1.07	0.2	1.3	0.0956	2.2632	6	0.8	27.149	0.534	20.71	4.119	20.1
TR09	Kasigau Road	miniature	active	C	May_16	25	1.07	0.2	1.3	0.0956	2.2632	6	0.8	27.782	0.546	21.31	4.309	20.71
TR09	Kasigau Road	miniature	active	C	May_16	26	1.07	0.2	1.3	0.0956	2.2632	6	0.8	27.625	0.688	20.22	3.705	21.31
TR09	Kasigau Road	miniature	active	C	May_16	27	1.07	0.2	1.3	0.0956	2.2632	6	0.8	27.351	0.583	20.55	4.209	20.22
TR09	Kasigau Road	miniature	active	C	May_16	28	1.07	0.2	1.3	0.0956	2.2632	6	0.8	27.555	0.556	20.74	4.643	20.55
TR09	Kasigau Road	miniature	active	C	May_16	29	1.07	0.2	1.3	0.0956	2.2632	6	0.8	28.162	0.583	20.84	4.949	20.74
TR09	Kasigau Road	miniature	active	C	May_16	30	1.07	0.2	1.3	0.0956	2.2632	6	0.8	28.519	0.607	21.71	4.818	20.84
TR09	Kasigau Road	miniature	active	C	May_16	31	1.07	0.2	1.3	0.0956	2.2632	6	0.8	28.724	0.538	22.43	4.546	21.71
TR09	Kasigau Road	miniature	active	C	Jun_16	1	1.07	0.2	1.3	0.0956	2.2632	6	0.8	28.902	0.5	22.3	4.367	22.43
TR09	Kasigau Road	miniature	active	C	Jun_16	2	1.07	0.2	1.3	0.0956	2.2632	6	0.8	28.78	0.567	22.38	4.012	22.3
TR09	Kasigau Road	miniature	active	C	Jun_16	3	1.07	0.2	1.3	0.0956	2.2632	6	0.8	28.756	0.457	21	3.155	22.38
TR09	Kasigau Road	miniature	active	C	Jun_16	4	1.07	0.2	1.3	0.0956	2.2632	6	0.8	27.883	0.428	21.84	4.093	21
TR09	Kasigau Road	miniature	active	C	Jun_16	5	1.07	0.2	1.3	0.0956	2.2632	6	0.8	28.249	0.49	22.06	4.417	21.84
TR09	Kasigau Road	miniature	active	C	Jun_16	6	1.07	0.2	1.3	0.0956	2.2632	6	0.8	28.896	0.465	21.82	4.116	22.06
TR09	Kasigau Road	miniature	active	C	Jun_16	7	1.07	0.2	1.3	0.0956	2.2632	6	0.8	28.631	0.609	21.65	4.477	21.82
TR09	Kasigau Road	miniature	active	C	Jun_16	8	1.07	0.2	1.3	0.0956	2.2632	6	0.8	28.319	0.601	21.01	4.912	21.65
TR09	Kasigau Road	miniature	active	C	Jun_16	9	1.07	0.2	1.3	0.0956	2.2632	6	0.8	28.116	0.65	20.5	4.626	21.01
TR09	Kasigau Road	miniature	active	C	Jun_16	10	1.07	0.2	1.3	0.0956	2.2632	6	0.8	27.436	0.636	20.66	4.506	20.5
TR09	Kasigau Road	miniature	active	C	Jun_16	11	1.07	0.2	1.3	0.0956	2.2632	6	0.8	27.546	0.288	20.55	3.203	20.66
TR09	Kasigau Road	miniature	active	C	Jun_16	12	1.07	0.2	1.3	0.0956	2.2632	6	0.8	27.516	0.33	20.93	3.098	20.55
TR09	Kasigau Road	miniature	active	C	Jun_16	13	1.07	0.2	1.3	0.0956	2.2632	6	0.8	27.274	0.507	20.1	4.037	20.93
TR09	Kasigau Road	miniature	active	C	Jun_16	14	1.07	0.2	1.3	0.0956	2.2632	6	0.8	26.907	0.858	20.63	5.877	20.1
TR09	Kasigau Road	miniature	active	C	Jun_16	15	1.07	0.2	1.3	0.0956	2.2632	6	0.8	28.24	0.6	21.33	5.05	20.63
TR09	Kasigau Road	miniature	active	C	Jun_16	16	1.07	0.2	1.3	0.0956	2.2632	6	0.8	28.827	0.485	21.26	4.16	21.33
TR09	Kasigau Road	miniature	active	C	Jun_16	17	1.07	0.2	1.3	0.0956	2.2632	6	0.8	28.895	0.648	21.22	5.061	21.26
TR09	Kasigau Road	miniature	active	C	Jun_16	18	1.07	0.2	1.3	0.0956	2.2632	6	0.8	29.01	0.497	21.57	3.731	21.22
TR09	Kasigau Road	miniature	active	C	Jun_16	19	1.07	0.2	1.3	0.0956	2.2632	6	0.8	28.443	0.386	21.48	3.85	21.57
TR09	Kasigau Road	miniature	active	C	Jun_16	20	1.07	0.2	1.3	0.0956	2.2632	6	0.8	28.382	0.357	20.84	3.191	21.48
TR09	Kasigau Road	miniature	active	C	Jun_16	21	1.07	0.2	1.3	0.0956	2.2632	6	0.8	27.844	0.575	20.16	3.267	20.84
TR09	Kasigau Road	miniature	active	C	Jun_16	22	1.07	0.2	1.3	0.0956	2.2632	6	0.8	27.094	0.389	19.21	1.849	20.16
TR09	Kasigau Road	miniature	active	C	Jun_16	23	1.07	0.2	1.3	0.0956	2.2632	6	0.8	26.618	0.299	20.49	3.64	19.21
TR09	Kasigau Road	miniature	active	C	Jun_16	24	1.07	0.2	1.3	0.0956	2.2632	6	0.8	26.843	0.381	19.56	3.248	20.49
TR09	Kasigau Road	miniature	active	C	Jun_16	25	1.07	0.2	1.3	0.0956	2.2632	6	0.8	27.087	0.421	19.82	3.134	19.56
TR09	Kasigau Road	miniature	active	C	Jun_16	26	1.07	0.2	1.3	0.0956	2.2632	6	0.8	27.039	0.38	20.5	3.501	19.82
TR09	Kasigau Road	miniature	active	C	Jun_16	27	1.07	0.2	1.3	0.0956	2.2632	6	0.8	27.257	0.42	20.62	3.71	20.5
TR09	Kasigau Road	miniature	active	C	Jun_16	28	1.07	0.2	1.3	0.0956	2.2632	6	0.8	28.006	0.584	20.83	4.843	20.62
TR09	Kasigau Road	miniature	active	C	Jun_16	29	1.07	0.2	1.3	0.0956	2.2632	6	0.8	27.976	0.507	20.03	3.563	20.83
TR09	Kasigau Road	miniature	active	C	Jun_16	30	1.07	0.2	1.3	0.0956	2.2632	6	0.8	27.406	0.548	20.15	4.417	20.03
TR09	Kasigau Road	miniature	active	C	Jul_16	1	1.07	0.2	1.3	0.0956	2.2632	6	0.8	27.928	0.636	19.88	4.258	20.15
TR09	Kasigau Road	miniature	active	C	Jul_16	2	1.07	0.2	1.3	0.0956	2.2632	6	0.8	28.148	0.431	20.31	3.403	19.88
TR09	Kasigau Road	miniature	active	C	Jul_16	3	1.07	0.2	1.3	0.0956	2.2632	6	0.8	27.962	0.482	20.18	3.939	20.31
TR09	Kasigau Road	miniature	active	C	Jul_16	4	1.07	0.2	1.3	0.0956	2.2632	6	0.8	27.452	0.765	19.89	5.514	20.18
TR09	Kasigau Road	miniature	active	C	Jul_16	5	1.07	0.2	1.3	0.0956	2.2632	6	0.8	27.991	0.582	19.44	4.345	19.89
TR09	Kasigau Road	miniature	active	C	Jul_16	6	1.07	0.2	1.3	0.0956	2.2632	6	0.8	27.532	0.644	19.06	3.391	19.44
TR09	Kasigau Road	miniature	active	C	Jul_16	7	1.07	0.2	1.3	0.0956	2.2632	6	0.8	26.677	0.438	18.66	3.3	19.06
TR09	Kasigau Road	miniature	active	C	Jul_16	8	1.07	0.2	1.3	0.0956	2.2632	6	0.8	26.796	0.564	18.39	3.012	18.66
TR09	Kasigau Road	miniature	active	C	Jul_16	9	1.07	0.2	1.3	0.0956	2.2632	6	0.8	25.712	0.594	18.32	4.17	18.39
TR09	Kasigau Road	miniature	active	C	Jul_16	10	1.07	0.2	1.3	0.0956	2.2632	6	0.8	25.836	0.465	18.63	3.257	18.32
TR09	Kasigau Road	miniature	active	C	Jul_16	11	1.07	0.2	1.3	0.0956	2.2632	6	0.8	25.774	0.327	18.18	3.085	18.63
TR09	Kasigau Road	miniature	active	C	Jul_16	12	1.07	0.2	1.3	0.0956	2.2632	6	0.8	25.555	0.641	17.61	2.89	18.18
TR09	Kasigau Road	miniature	active	C	Jul_16	13	1.07	0.2	1.3	0.0956	2.2632	6	0.8	25.047	0.332	18.38	3.212	17.61
TR09	Kasigau Road	miniature	active	C	Jul_16	14	1.07	0.2	1.3	0.0956	2.2632	6	0.8	25.445	0.567	18.88	4.681	18.38
TR09	Kasigau Road	miniature	active	C	Jul_16	15	1.07	0.2	1.3	0.0956	2.2632	6	0.8	26.138	0.443	18.3	3.217	18.88
TR09	Kasigau Road	miniature	active	C	Jul_16	16	1.07	0.2	1.3	0.0956	2.2632	6	0.8	26.102	0.437	19.4	3.132	18.3
TR09	Kasigau Road	miniature	active	C	Jul_16	17	1.07	0.2	1.3	0.0956	2.2632	6	0.8	26.599	0.414	20.23	3.91	19.4
TR09	Kasigau Road	miniature	active	C	Jul_16	18	1.07	0.2	1.3	0.0956	2.2632	6	0.8	26.969	0.487	19.11	3.37	20.23
TR09	Kasigau Road	miniature	active	C	Jul_16	19	1.07	0.2	1.3	0.0956	2.2632	6	0.8	26.852	0.406	19.63	4.28	19.11
TR09	Kasigau Road	miniature	active	C	Jul_16	20	1.07	0.2	1.3	0.0956	2.2632	6	0.8	26.828	0.604	19.55	5.141	19.63
TR09	Kasigau Road	miniature	active	C	Jul_16	21	1.07	0.2	1.3	0.0956	2.2632	6	0.8	27.273	0.466	19.75	4.401	19.55
TR09	Kasigau Road	miniature	active	C	Jul_16	22	1.07	0.2	1.3	0.0956	2.2632	6	0.8	27.39	0.473	20.45	4.583	19.75
TR09	Kasigau Road	miniature	active	C	Jul_16	23	1.07	0.2	1.3	0.0956	2.2632	6	0.8	27.499	0.723	20.92	5.429	20.45
TR09	Kasigau Road	miniature	active	C	Jul_16	24	1.07	0.2	1.3	0.0956	2.2632	6	0.8	28.272	0.513	20.37	4.875	20.92
TR09	Kasigau Road	miniature	active	C	Jul_16	25	1.07	0.2	1.3	0.0956	2.2632	6	0.8	28.777	0.386	20.23	3.148	20.37
TR09	Kasigau Road	miniature	active	C	Jul_16	26	1.07	0.2	1.3	0.0956	2.2632	6	0.8	28.218	0.506	20.24	4.69	20.23
TR09	Kasigau Road	miniature	active	C	Jul_16	27	1.07	0.2	1.3	0.0956	2.2632	6	0.8	28.303	0.584	21.07	4.639	20.24
TR09	Kasigau Road	miniature	active	C	Jul_16	28	1.07	0.2	1.3	0.0956	2.2632	6	0.8	28.558	0.665	20.13	4.646	21.07
TR09	Kasigau Road	miniature	active	C	Jul_16	29	1.07	0.2	1.3	0.0956	2.2632	6	0.8	28.643	0.472	20.85	4.252	20.13
TR09	Kasigau Road	miniature	active	C	Jul_16	30	1.07	0.2	1.3	0.0956	2.2632	6	0.8	28.198	0.796	20.44	5.177	20.85
TR09	Kasigau Road	miniature	active	C	Jul_16	31	1.07	0.2	1.3	0.0956	2.2632	6	0.8	28.311	0.89	20.3	6.04	20.44
TR09	Kasigau Road	miniature	active	C	Aug_16	1	1.07	0.2	1.3	0.0956	2.2632	6	0.8	28.164	0.639	20.1	4.903	20.3
TR09	Kasigau Road	miniature	active	C	Aug_16	2	1.07	0.2	1.3	0.0956	2.2632	6	0.8	27.82	0.754	20.05	6.451	20.1
TR09	Kasigau Road	miniature	active	C	Aug_16	3	1.07	0.2	1.3	0.0956	2.2632	6	0.8	28.183	0.788	20.26	5.908	20.05
TR09	Kasigau Road	miniature	active	C	Aug_16	4	1.07	0.2	1.3	0.0956	2.2632	6	0.8	28.523	0.314	20.64	4.101	20.26
TR09	Kasigau Road	miniature	active	C	Aug_16	5	1.07	0.2	1.3	0.0956	2.2632	6	0.8	27.944	0.442	18.55	3.409	20.64
TR09	Kasigau Road	miniature	active	C	Aug_16	6	1.07	0.2	1.3	0.0956	2.2632	6	0.8	27.406	0.365	19.75	3.35	18.55
TR09	Kasigau Road	miniature	active	C	Aug_16	7	1.07	0.2	1.3	0.0956	2.2632	6	0.8	27.657	0.209	19.21	3.765	19.75
TR09	Kasigau Road	miniature	active	C	Aug_16	8	1.07	0.2	1.3	0.0956	2.2632	6	0.8	27.476	0.216	19.46	2.808	19.21
TR09	Kasigau Road	miniature	active	C	Aug_16	9	1.07	0.2	1.3	0.0956	2.2632	6	0.8	26.906	0.346	18.49	1.881	19.46
TR09	Kasigau Road	miniature	active	C	Aug_16	10	1.07	0.2	1.3	0.0956	2.2632	6	0.8	26	0.498	18.7	5.09	18.49
TR09	Kasigau Road	miniature	active	C	Aug_16	11	1.07	0.2	1.3	0.0956	2.2632	6	0.8	26.195	0.431	19.6	4.064	18.7
TR09	Kasigau Road	miniature	active	C	Aug_16	12	1.07	0.2	1.3	0.0956	2.2632	6	0.8	26.829	0.453	19.36	3.986	19.6
TR09	Kasigau Road	miniature	active	C	Aug_16	13	1.07	0.2	1.3	0.0956	2.2632	6	0.8	27.172	0.343	20.19	3.357	19.36
TR09	Kasigau Road	miniature	active	C	Aug_16	14	1.07	0.2	1.3	0.0956	2.2632	6	0.8	27.335	0.294	19.46	3.423	20.19
TR09	Kasigau Road	miniature	active	C	Aug_16	15	1.07	0.2	1.3	0.0956	2.2632	6	0.8	27.374	0.181	19.38	2.605	19.46
TR09	Kasigau Road	miniature	active	C	Aug_16	16	1.07	0.2	1.3	0.0956	2.2632	6	0.8	27.016	0.408	18.93	3.28	19.38
TR09	Kasigau Road	miniature	active	C	Aug_16	17	1.07	0.2	1.3	0.0956	2.2632	6	0.8	27.461	0.722	20.84	4.883	18.93
TR09	Kasigau Road	miniature	active	C	Aug_16	18	1.07	0.2	1.3	0.0956	2.2632	6	0.8	28.528	0.657	20.09	4.579	20.84
TR09	Kasigau Road	miniature	active	C	Aug_16	19	1.07	0.2	1.3	0.0956	2.2632	6	0.8	28.822	0.573	21.04	4.841	20.09
TR09	Kasigau Road	miniature	active	C	Aug_16	20	1.07	0.2	1.3	0.0956	2.2632	6	0.8	28.849	0.44	20.58	4.201	21.04
TR09	Kasigau Road	miniature	active	C	Aug_16	21	1.07	0.2	1.3	0.0956	2.2632	6	0.8	28.289	0.667	19.82	5.555	20.58
TR09	Kasigau Road	miniature	active	C	Aug_16	22	1.07	0.2	1.3	0.0956	2.2632	6	0.8	28.604	0.693	21.08	4.831	19.82
TR09	Kasigau Road	miniature	active	C	Aug_16	23	1.07	0.2	1.3	0.0956	2.2632	6	0.8	29.141	0.629	20.64	4.584	21.08
TR09	Kasigau Road	miniature	active	C	Aug_16	24	1.07	0.2	1.3	0.0956	2.2632	6	0.8	28.278	0.848	19.38	4.883	20.64
TR09	Kasigau Road	miniature	active	C	Aug_16	25	1.07	0.2	1.3	0.0956	2.2632	6	0.8	27.907	0.487	18.64	4.909	19.38
TR09	Kasigau Road	miniature	active	C	Aug_16	26	1.07	0.2	1.3	0.0956	2.2632	6	0.8	27.437	0.621	19.05	3.525	18.64
TR09	Kasigau Road	miniature	active	C	Aug_16	27	1.07	0.2	1.3	0.0956	2.2632	6	0.8	26.922	0.579	19.51	3.79	19.05
TR09	Kasigau Road	miniature	active	C	Aug_16	28	1.07	0.2	1.3	0.0956	2.2632	6	0.8	27.68	0.471	20.31	3.858	19.51
TR09	Kasigau Road	miniature	active	C	Aug_16	29	1.07	0.2	1.3	0.0956	2.2632	6	0.8	27.375	0.456	18.48	3.45	20.31
TR09	Kasigau Road	miniature	active	C	Aug_16	30	1.07	0.2	1.3	0.0956	2.2632	6	0.8	26.688	0.489	18.86	4.54	18.48
TR09	Kasigau Road	miniature	active	C	Aug_16	31	1.07	0.2	1.3	0.0956	2.2632	6	0.8	27.031	0.582	19.68	4.775	18.86
TR09	Kasigau Road	miniature	active	C	Sep_16	1	1.07	0.2	1.3	0.0956	2.2632	6	0.8	27.109	0.429	17.19	2.196	19.68
TR09	Kasigau Road	miniature	active	C	Sep_16	2	1.07	0.2	1.3	0.0956	2.2632	6	0.8	26.542	0.21	18.73	3.353	17.19
TR09	Kasigau Road	miniature	active	C	Sep_16	3	1.07	0.2	1.3	0.0956	2.2632	6	0.8	26.195	0.366	19.33	3.826	18.73
TR09	Kasigau Road	miniature	active	C	Sep_16	4	1.07	0.2	1.3	0.0956	2.2632	6	0.8	26.602	0.379	19.75	4.37	19.33
TR09	Kasigau Road	miniature	active	C	Sep_16	5	1.07	0.2	1.3	0.0956	2.2632	6	0.8	26.907	0.457	18.92	3.233	19.75
TR09	Kasigau Road	miniature	active	C	Sep_16	6	1.07	0.2	1.3	0.0956	2.2632	6	0.8	26.758	0.473	19.81	3.632	18.92
TR09	Kasigau Road	miniature	active	C	Sep_16	7	1.07	0.2	1.3	0.0956	2.2632	6	0.8	27.063	0.463	19.52	2.923	19.81
TR09	Kasigau Road	miniature	active	C	Sep_16	8	1.07	0.2	1.3	0.0956	2.2632	6	0.8	26.946	0.689	20.53	5.917	19.52
TR09	Kasigau Road	miniature	active	C	Sep_16	9	1.07	0.2	1.3	0.0956	2.2632	6	0.8	27.889	0.428	21.04	4.37	20.53
TR09	Kasigau Road	miniature	active	C	Sep_16	10	1.07	0.2	1.3	0.0956	2.2632	6	0.8	27.663	0.391	18.8	3.838	21.04
TR09	Kasigau Road	miniature	active	C	Sep_16	11	1.07	0.2	1.3	0.0956	2.2632	6	0.8	27.515	0.443	20.42	5.239	18.8
TR09	Kasigau Road	miniature	active	C	Sep_16	12	1.07	0.2	1.3	0.0956	2.2632	6	0.8	28.546	0.368	21.34	4.56	20.42
TR09	Kasigau Road	miniature	active	C	Sep_16	13	1.07	0.2	1.3	0.0956	2.2632	6	0.8	28.136	0.713	19.96	5.583	21.34
TR09	Kasigau Road	miniature	active	C	Sep_16	14	1.07	0.2	1.3	0.0956	2.2632	6	0.8	27.866	0.393	19.25	2.799	19.96
TR09	Kasigau Road	miniature	active	C	Sep_16	15	1.07	0.2	1.3	0.0956	2.2632	6	0.8	27.39	0.498	21.3	4.757	19.25
TR09	Kasigau Road	miniature	active	C	Sep_16	16	1.07	0.2	1.3	0.0956	2.2632	6	0.8	28.053	0.456	20.86	4.164	21.3
TR09	Kasigau Road	miniature	active	C	Sep_16	17	1.07	0.2	1.3	0.0956	2.2632	6	0.8	27.765	0.654	21.23	5.243	20.86
TR09	Kasigau Road	miniature	active	C	Sep_16	18	1.07	0.2	1.3	0.0956	2.2632	6	0.8	28.188	0.573	20.06	4.882	21.23
TR09	Kasigau Road	miniature	active	C	Sep_16	19	1.07	0.2	1.3	0.0956	2.2632	6	0.8	27.898	0.556	20.41	5.113	20.06
TR09	Kasigau Road	miniature	active	C	Sep_16	20	1.07	0.2	1.3	0.0956	2.2632	6	0.8	27.765	0.383	19.76	4.752	20.41
TR09	Kasigau Road	miniature	active	C	Sep_16	21	1.07	0.2	1.3	0.0956	2.2632	6	0.8	27.532	0.578	20.31	4.627	19.76
TR09	Kasigau Road	miniature	active	C	Sep_16	22	1.07	0.2	1.3	0.0956	2.2632	6	0.8	27.085	0.445	20	4.635	20.31
TR09	Kasigau Road	miniature	active	C	Sep_16	23	1.07	0.2	1.3	0.0956	2.2632	6	0.8	27.273	0.35	20.58	3.99	20
TR09	Kasigau Road	miniature	active	C	Sep_16	24	1.07	0.2	1.3	0.0956	2.2632	6	0.8	27.678	0.453	20.71	3.641	20.58
TR09	Kasigau Road	miniature	active	C	Sep_16	25	1.07	0.2	1.3	0.0956	2.2632	6	0.8	27.835	0.407	21.79	4.683	20.71
TR09	Kasigau Road	miniature	active	C	Sep_16	26	1.07	0.2	1.3	0.0956	2.2632	6	0.8	28.193	0.513	21.34	4.984	21.79
TR09	Kasigau Road	miniature	active	C	Sep_16	27	1.07	0.2	1.3	0.0956	2.2632	6	0.8	27.71	0.673	20.93	5.258	21.34
TR09	Kasigau Road	miniature	active	C	Sep_16	28	1.07	0.2	1.3	0.0956	2.2632	6	0.8	28.163	0.379	21.41	3.669	20.93
TR09	Kasigau Road	miniature	active	C	Sep_16	29	1.07	0.2	1.3	0.0956	2.2632	6	0.8	28.211	0.361	20.55	3.421	21.41
TR09	Kasigau Road	miniature	active	C	Sep_16	30	1.07	0.2	1.3	0.0956	2.2632	6	0.8	27.586	0.475	21.69	4.874	20.55
TR09	Kasigau Road	miniature	active	C	Oct_16	1	1.07	0.2	1.3	0.0956	2.2632	6	0.8	27.477	0.532	20.74	4.938	21.69
TR09	Kasigau Road	miniature	active	C	Oct_16	2	1.07	0.2	1.3	0.0956	2.2632	6	0.8	27.242	0.336	20.28	3.846	20.74
TR09	Kasigau Road	miniature	active	C	Oct_16	3	1.07	0.2	1.3	0.0956	2.2632	6	0.8	27.547	0.493	22.72	5.442	20.28
TR09	Kasigau Road	miniature	active	C	Oct_16	4	1.07	0.2	1.3	0.0956	2.2632	6	0.8	28.351	0.407	22.38	4.583	22.72
TR09	Kasigau Road	miniature	active	C	Oct_16	5	1.07	0.2	1.3	0.0956	2.2632	6	0.8	28.248	0.399	21.51	3.604	22.38
TR09	Kasigau Road	miniature	active	C	Oct_16	6	1.07	0.2	1.3	0.0956	2.2632	6	0.8	27.804	0.635	21.29	4.597	21.51
TR09	Kasigau Road	miniature	active	C	Oct_16	7	1.07	0.2	1.3	0.0956	2.2632	6	0.8	28.182	0.666	23.12	5.721	21.29
TR09	Kasigau Road	miniature	active	C	Oct_16	8	1.07	0.2	1.3	0.0956	2.2632	6	0.8	28.584	0.636	22.66	6.063	23.12
TR09	Kasigau Road	miniature	active	C	Oct_16	9	1.07	0.2	1.3	0.0956	2.2632	6	0.8	28.483	0.515	22.76	4.997	22.66
TR09	Kasigau Road	miniature	active	C	Oct_16	10	1.07	0.2	1.3	0.0956	2.2632	6	0.8	28.535	0.55	22.04	5.186	22.76
TR09	Kasigau Road	miniature	active	C	Oct_16	11	1.07	0.2	1.3	0.0956	2.2632	6	0.8	28.756	0.334	22.85	4.977	22.04
TR09	Kasigau Road	miniature	active	C	Oct_16	12	1.07	0.2	1.3	0.0956	2.2632	6	0.8	28.528	0.671	21.69	5.395	22.85
TR09	Kasigau Road	miniature	active	C	Oct_16	13	1.07	0.2	1.3	0.0956	2.2632	6	0.8	28.086	0.562	22.1	5.972	21.69
TR09	Kasigau Road	miniature	active	C	Oct_16	14	1.07	0.2	1.3	0.0956	2.2632	6	0.8	28.218	0.521	22.17	5.112	22.1
TR09	Kasigau Road	miniature	active	C	Oct_16	15	1.07	0.2	1.3	0.0956	2.2632	6	0.8	28.354	0.68	22.28	5.402	22.17
TR09	Kasigau Road	miniature	active	C	Oct_16	16	1.07	0.2	1.3	0.0956	2.2632	6	0.8	28.429	0.785	21.86	5.799	22.28
TR09	Kasigau Road	miniature	active	C	Oct_16	17	1.07	0.2	1.3	0.0956	2.2632	6	0.8	28.57	0.526	21.99	6.012	21.86
TR09	Kasigau Road	miniature	active	C	Oct_16	18	1.07	0.2	1.3	0.0956	2.2632	6	0.8	28.778	0.598	22.41	5.204	21.99
TR09	Kasigau Road	miniature	active	C	Oct_16	19	1.07	0.2	1.3	0.0956	2.2632	6	0.8	28.756	0.403	21.89	4.71	22.41
TR09	Kasigau Road	miniature	active	C	Oct_16	20	1.07	0.2	1.3	0.0956	2.2632	6	0.8	28.249	0.501	21.94	5.195	21.89
TR09	Kasigau Road	miniature	active	C	Oct_16	21	1.07	0.2	1.3	0.0956	2.2632	6	0.8	28.339	0.657	21.74	5.275	21.94
TR09	Kasigau Road	miniature	active	C	Oct_16	22	1.07	0.2	1.3	0.0956	2.2632	6	0.8	27.765	0.543	22.26	5.941	21.74
TR09	Kasigau Road	miniature	active	C	Oct_16	23	1.07	0.2	1.3	0.0956	2.2632	6	0.8	28.147	0.561	23	5.736	22.26
TR09	Kasigau Road	miniature	active	C	Oct_16	24	1.07	0.2	1.3	0.0956	2.2632	6	0.8	28.72	0.653	21.97	5.13	23
TR09	Kasigau Road	miniature	active	C	Oct_16	25	1.07	0.2	1.3	0.0956	2.2632	6	0.8	28.823	0.453	21.95	5.259	21.97
TR09	Kasigau Road	miniature	active	C	Oct_16	26	1.07	0.2	1.3	0.0956	2.2632	6	0.8	29.02	0.505	23.06	4.374	21.95
TR09	Kasigau Road	miniature	active	C	Oct_16	27	1.07	0.2	1.3	0.0956	2.2632	6	0.8	29.232	0.436	22.66	4.536	23.06
TR09	Kasigau Road	miniature	active	C	Oct_16	28	1.07	0.2	1.3	0.0956	2.2632	6	0.8	29.118	0.565	22.7	5.008	22.66
TR09	Kasigau Road	miniature	active	C	Oct_16	29	1.07	0.2	1.3	0.0956	2.2632	6	0.8	29.045	0.53	23.02	6.429	22.7
TR09	Kasigau Road	miniature	active	C	Oct_16	30	1.07	0.2	1.3	0.0956	2.2632	6	0.8	29.923	0.591	24.17	5.087	23.02
TR09	Kasigau Road	miniature	active	C	Oct_16	31	1.07	0.2	1.3	0.0956	2.2632	6	0.8	30.236	0.449	24.36	4.902	24.17
TR09	Kasigau Road	miniature	active	C	Nov_16	1	1.07	0.2	1.3	0.0956	2.2632	6	0.8	30.004	0.45	24.13	4.124	24.36
TR09	Kasigau Road	miniature	active	C	Nov_16	2	1.07	0.2	1.3	0.0956	2.2632	6	0.8	29.813	0.443	23.35	4.108	24.13
TR09	Kasigau Road	miniature	active	C	Nov_16	3	1.07	0.2	1.3	0.0956	2.2632	6	0.8	29.763	0.376	23.41	4.684	23.35
TR09	Kasigau Road	miniature	active	C	Nov_16	4	1.07	0.2	1.3	0.0956	2.2632	6	0.8	29.593	0.354	22.95	4.376	23.41
TR09	Kasigau Road	miniature	active	C	Nov_16	5	1.07	0.2	1.3	0.0956	2.2632	6	0.8	29.158	0.504	22.84	4.454	22.95
TR09	Kasigau Road	miniature	active	C	Nov_16	6	1.07	0.2	1.3	0.0956	2.2632	6	0.8	29.17	0.451	23.31	4.79	22.84
TR09	Kasigau Road	miniature	active	C	Nov_16	7	1.07	0.2	1.3	0.0956	2.2632	6	0.8	28.904	0.475	22.69	5.299	23.31
TR09	Kasigau Road	miniature	active	C	Nov_16	8	1.07	0.2	1.3	0.0956	2.2632	6	0.8	29.141	0.523	23.49	4.936	22.69
TR09	Kasigau Road	miniature	active	C	Nov_16	9	1.07	0.2	1.3	0.0956	2.2632	6	0.8	29.139	0.311	23.73	4.532	23.49
TR09	Kasigau Road	miniature	active	C	Nov_16	10	1.07	0.2	1.3	0.0956	2.2632	6	0.8	27.999	0.467	23.77	4.197	23.73
TR09	Kasigau Road	miniature	active	C	Nov_16	11	1.07	0.2	1.3	0.0956	2.2632	6	0.8	27.983	0.451	23.79	4.256	23.77
TR09	Kasigau Road	miniature	active	C	Nov_16	12	1.07	0.2	1.3	0.0956	2.2632	6	0.8	28.249	0.448	22.45	3.164	23.79
TR09	Kasigau Road	miniature	active	C	Nov_16	13	1.07	0.2	1.3	0.0956	2.2632	6	0.8	27.555	0.234	23.28	4.056	22.45
TR09	Kasigau Road	miniature	active	C	Nov_16	14	1.07	0.2	1.3	0.0956	2.2632	6	0.8	27.352	0.308	23.59	3.809	23.28
TR09	Kasigau Road	miniature	active	C	Nov_16	15	1.07	0.2	1.3	0.0956	2.2632	6	0.8	27.468	0.542	22.73	4.305	23.59
TR09	Kasigau Road	miniature	active	C	Nov_16	16	1.07	0.2	1.3	0.0956	2.2632	6	0.8	27.836	0.507	22.56	3.387	22.73
TR09	Kasigau Road	miniature	active	C	Nov_16	17	1.07	0.2	1.3	0.0956	2.2632	6	0.8	28.471	0.523	23.32	4.179	22.56
TR09	Kasigau Road	miniature	active	C	Nov_16	18	1.07	0.2	1.3	0.0956	2.2632	6	0.8	29.059	0.441	24.51	4.338	23.32
TR09	Kasigau Road	miniature	active	C	Nov_16	19	1.07	0.2	1.3	0.0956	2.2632	6	0.8	29.137	0.423	22.78	3.494	24.51
TR09	Kasigau Road	miniature	active	C	Nov_16	20	1.07	0.2	1.3	0.0956	2.2632	6	0.8	28.677	0.413	23.45	3.819	22.78
TR09	Kasigau Road	miniature	active	C	Nov_16	21	1.07	0.2	1.3	0.0956	2.2632	6	0.8	27.593	0.293	23.29	4.153	23.45
TR09	Kasigau Road	miniature	active	C	Nov_16	22	1.07	0.2	1.3	0.0956	2.2632	6	0.8	27.203	0.369	23.79	4.859	23.29
TR09	Kasigau Road	miniature	active	C	Nov_16	23	1.07	0.2	1.3	0.0956	2.2632	6	0.8	27.695	0.363	23.19	5.088	23.79
TR09	Kasigau Road	miniature	active	C	Nov_16	24	1.07	0.2	1.3	0.0956	2.2632	6	0.8	28.412	0.331	23.63	5.255	23.19
TR09	Kasigau Road	miniature	active	C	Nov_16	25	1.07	0.2	1.3	0.0956	2.2632	6	0.8	28.391	0.439	23.41	4.824	23.63
TR09	Kasigau Road	miniature	active	C	Nov_16	26	1.07	0.2	1.3	0.0956	2.2632	6	0.8	28.148	0.473	23.89	4.469	23.41
TR09	Kasigau Road	miniature	active	C	Nov_16	27	1.07	0.2	1.3	0.0956	2.2632	6	0.8	27.984	0.555	23.2	4.237	23.89
TR09	Kasigau Road	miniature	active	C	Nov_16	28	1.07	0.2	1.3	0.0956	2.2632	6	0.8	28.14	0.314	21.56	2.292	23.2
TR09	Kasigau Road	miniature	active	C	Nov_16	29	1.07	0.2	1.3	0.0956	2.2632	6	0.8	27.211	0.313	22.58	2.621	21.56
TR09	Kasigau Road	miniature	active	C	Nov_16	30	1.07	0.2	1.3	0.0956	2.2632	6	0.8	27.102	0.428	22.82	3.282	22.58
TR09	Kasigau Road	miniature	active	C	Dec_16	1	1.07	0.2	1.3	0.0956	2.2632	6	0.8	26.679	0.197	22.82	3.358	22.82
TR09	Kasigau Road	miniature	active	C	Dec_16	2	1.07	0.2	1.3	0.0956	2.2632	6	0.8	26.571	0.221	23.81	3.698	22.82
TR09	Kasigau Road	miniature	active	C	Dec_16	3	1.07	0.2	1.3	0.0956	2.2632	6	0.8	26.75	0.144	22.81	2.969	23.81
TR09	Kasigau Road	miniature	active	C	Dec_16	4	1.07	0.2	1.3	0.0956	2.2632	6	0.8	26.687	0.188	22.93	3.338	22.81
TR09	Kasigau Road	miniature	active	C	Dec_16	5	1.07	0.2	1.3	0.0956	2.2632	6	0.8	26.797	0.38	23.43	3.859	22.93
TR09	Kasigau Road	miniature	active	C	Dec_16	6	1.07	0.2	1.3	0.0956	2.2632	6	0.8	26.946	0.488	23.18	4.065	23.43
TR09	Kasigau Road	miniature	active	C	Dec_16	7	1.07	0.2	1.3	0.0956	2.2632	6	0.8	27.18	0.368	23.37	3.623	23.18
TR09	Kasigau Road	miniature	active	C	Dec_16	8	1.07	0.2	1.3	0.0956	2.2632	6	0.8	27.296	0.277	22.64	3.964	23.37
TR09	Kasigau Road	miniature	active	C	Dec_16	9	1.07	0.2	1.3	0.0956	2.2632	6	0.8	27.579	0.315	23.48	3.975	22.64
TR09	Kasigau Road	miniature	active	C	Dec_16	10	1.07	0.2	1.3	0.0956	2.2632	6	0.8	27.967	0.437	22.46	4.075	23.48
TR09	Kasigau Road	miniature	active	C	Dec_16	11	1.07	0.2	1.3	0.0956	2.2632	6	0.8	27.686	0.41	22.44	3.241	22.46
TR09	Kasigau Road	miniature	active	C	Dec_16	12	1.07	0.2	1.3	0.0956	2.2632	6	0.8	27.048	0.483	22.83	3.515	22.44
TR09	Kasigau Road	miniature	active	C	Dec_16	13	1.07	0.2	1.3	0.0956	2.2632	6	0.8	26.555	0.367	22.54	3.578	22.83
TR09	Kasigau Road	miniature	active	C	Dec_16	14	1.07	0.2	1.3	0.0956	2.2632	6	0.8	25.805	0.426	22.78	3.582	22.54
TR09	Kasigau Road	miniature	active	C	Dec_16	15	1.07	0.2	1.3	0.0956	2.2632	6	0.8	26.079	0.375	23.17	4.341	22.78
TR09	Kasigau Road	miniature	active	C	Dec_16	16	1.07	0.2	1.3	0.0956	2.2632	6	0.8	26.586	0.331	23.79	4.682	23.17
TR09	Kasigau Road	miniature	active	C	Dec_16	17	1.07	0.2	1.3	0.0956	2.2632	6	0.8	26.578	0.343	24.28	4.57	23.79
TR09	Kasigau Road	miniature	active	C	Dec_16	18	1.07	0.2	1.3	0.0956	2.2632	6	0.8	26.102	0.284	24.13	3.967	24.28
TR09	Kasigau Road	miniature	active	C	Dec_16	19	1.07	0.2	1.3	0.0956	2.2632	6	0.8	26.115	0.413	23.88	4.031	24.13
TR09	Kasigau Road	miniature	active	C	Dec_16	20	1.07	0.2	1.3	0.0956	2.2632	6	0.8	26.169	0.39	24.53	4.221	23.88
TR09	Kasigau Road	miniature	active	C	Dec_16	21	1.07	0.2	1.3	0.0956	2.2632	6	0.8	26.703	0.249	23.88	3.873	24.53
TR09	Kasigau Road	miniature	active	C	Dec_16	22	1.07	0.2	1.3	0.0956	2.2632	6	0.8	26.781	0.286	23.83	3.954	23.88
TR09	Kasigau Road	miniature	active	C	Dec_16	23	1.07	0.2	1.3	0.0956	2.2632	6	0.8	26.657	0.542	23.25	4.482	23.83
TR09	Kasigau Road	miniature	active	C	Dec_16	24	1.07	0.2	1.3	0.0956	2.2632	6	0.8	26.751	0.42	23.24	3.609	23.25
TR09	Kasigau Road	miniature	active	C	Dec_16	25	1.07	0.2	1.3	0.0956	2.2632	6	0.8	26.757	0.339	23.73	4.414	23.24
TR09	Kasigau Road	miniature	active	C	Dec_16	26	1.07	0.2	1.3	0.0956	2.2632	6	0.8	27.054	0.362	24.32	4.019	23.73
TR09	Kasigau Road	miniature	active	C	Dec_16	27	1.07	0.2	1.3	0.0956	2.2632	6	0.8	27.671	0.43	24.3	4.135	24.32
TR09	Kasigau Road	miniature	active	C	Dec_16	28	1.07	0.2	1.3	0.0956	2.2632	6	0.8	27.624	0.445	24.37	5.312	24.3
TR09	Kasigau Road	miniature	active	C	Dec_16	29	1.07	0.2	1.3	0.0956	2.2632	6	0.8	28.171	0.359	23.05	4.643	24.37
TR09	Kasigau Road	miniature	active	C	Dec_16	30	1.07	0.2	1.3	0.0956	2.2632	6	0.8	28.202	0.405	22.59	2.783	23.05
TR09	Kasigau Road	miniature	active	C	Dec_16	31	1.07	0.2	1.3	0.0956	2.2632	6	0.8	27.344	0.349	23.45	3.575	22.59
TR09	Kasigau Road	miniature	active	C	Jan_17	1	1.07	0.2	1.3	0.0956	2.2632	6	0.8	26.68	0.491	22.7	3.169	23.45
TR09	Kasigau Road	miniature	active	C	Jan_17	2	1.07	0.2	1.3	0.0956	2.2632	6	0.8	26.389	0.272	24.15	4.251	22.7
TR09	Kasigau Road	miniature	active	C	Jan_17	3	1.07	0.2	1.3	0.0956	2.2632	6	0.8	26.438	0.257	24.22	4.063	24.15
TR09	Kasigau Road	miniature	active	C	Jan_17	4	1.07	0.2	1.3	0.0956	2.2632	6	0.8	26.531	0.223	23.97	4.114	24.22
TR09	Kasigau Road	miniature	active	C	Jan_17	5	1.07	0.2	1.3	0.0956	2.2632	6	0.8	26.677	0.3	23.66	4.371	23.97
TR09	Kasigau Road	miniature	active	C	Jan_17	6	1.07	0.2	1.3	0.0956	2.2632	6	0.8	26.961	0.31	23.87	4.556	23.66
TR09	Kasigau Road	miniature	active	C	Jan_17	7	1.07	0.2	1.3	0.0956	2.2632	6	0.8	27.126	0.563	24.76	5.18	23.87
TR09	Kasigau Road	miniature	active	C	Jan_17	8	1.07	0.2	1.3	0.0956	2.2632	6	0.8	27.585	0.335	25.61	4.724	24.76
TR09	Kasigau Road	miniature	active	C	Jan_17	9	1.07	0.2	1.3	0.0956	2.2632	6	0.8	28.086	0.391	24.83	3.582	25.61
TR09	Kasigau Road	miniature	active	C	Jan_17	10	1.07	0.2	1.3	0.0956	2.2632	6	0.8	27.734	0.357	23.45	3.675	24.83
TR09	Kasigau Road	miniature	active	C	Jan_17	11	1.07	0.2	1.3	0.0956	2.2632	6	0.8	27.047	0.613	23.12	4.144	23.45
TR09	Kasigau Road	miniature	active	C	Jan_17	12	1.07	0.2	1.3	0.0956	2.2632	6	0.8	26.688	0.605	23.68	4.889	23.12
TR09	Kasigau Road	miniature	active	C	Jan_17	13	1.07	0.2	1.3	0.0956	2.2632	6	0.8	27.117	0.541	24.29	5.014	23.68
TR09	Kasigau Road	miniature	active	C	Jan_17	14	1.07	0.2	1.3	0.0956	2.2632	6	0.8	27.343	0.559	25.13	5.111	24.29
TR09	Kasigau Road	miniature	active	C	Jan_17	15	1.07	0.2	1.3	0.0956	2.2632	6	0.8	27.952	0.482	24.91	4.904	25.13
TR09	Kasigau Road	miniature	active	C	Jan_17	16	1.07	0.2	1.3	0.0956	2.2632	6	0.8	28.031	0.536	23.59	4.84	24.91
TR09	Kasigau Road	miniature	active	C	Jan_17	17	1.07	0.2	1.3	0.0956	2.2632	6	0.8	27.852	0.48	23.43	4.614	23.59
TR09	Kasigau Road	miniature	active	C	Jan_17	18	1.07	0.2	1.3	0.0956	2.2632	6	0.8	28.015	0.398	24.41	4.222	23.43
TR09	Kasigau Road	miniature	active	C	Jan_17	19	1.07	0.2	1.3	0.0956	2.2632	6	0.8	28.217	0.463	25.34	4.844	24.41
TR09	Kasigau Road	miniature	active	C	Jan_17	20	1.07	0.2	1.3	0.0956	2.2632	6	0.8	28.253	0.697	24.74	5.107	25.34
TR09	Kasigau Road	miniature	active	C	Jan_17	21	1.07	0.2	1.3	0.0956	2.2632	6	0.8	28.614	0.52	24.58	4.469	24.74
TR09	Kasigau Road	miniature	active	C	Jan_17	22	1.07	0.2	1.3	0.0956	2.2632	6	0.8	28.401	0.581	24.22	4.147	24.58
TR09	Kasigau Road	miniature	active	C	Jan_17	23	1.07	0.2	1.3	0.0956	2.2632	6	0.8	28.147	0.439	23.75	4.432	24.22
TR09	Kasigau Road	miniature	active	C	Jan_17	24	1.07	0.2	1.3	0.0956	2.2632	6	0.8	28.069	0.516	24.81	5.889	23.75
TR09	Kasigau Road	miniature	active	C	Jan_17	25	1.07	0.2	1.3	0.0956	2.2632	6	0.8	28.607	0.618	25.34	5.163	24.81
TR09	Kasigau Road	miniature	active	C	Jan_17	26	1.07	0.2	1.3	0.0956	2.2632	6	0.8	28.584	0.575	24.67	5.171	25.34
TR09	Kasigau Road	miniature	active	C	Jan_17	27	1.07	0.2	1.3	0.0956	2.2632	6	0.8	29.15	0.45	25.4	4.423	24.67
TR09	Kasigau Road	miniature	active	C	Jan_17	28	1.07	0.2	1.3	0.0956	2.2632	6	0.8	29.407	0.653	25.03	4.238	25.4
TR09	Kasigau Road	miniature	active	C	Jan_17	29	1.07	0.2	1.3	0.0956	2.2632	6	0.8	29.489	0.671	25.55	4.544	25.03
TR09	Kasigau Road	miniature	active	C	Jan_17	30	1.07	0.2	1.3	0.0956	2.2632	6	0.8	29.706	0.638	25.94	4.631	25.55
TR09	Kasigau Road	miniature	active	C	Jan_17	31	1.07	0.2	1.3	0.0956	2.2632	6	0.8	29.728	0.466	23.51	2.629	25.94
TR09	Kasigau Road	miniature	active	C	Feb_17	1	1.07	0.2	1.3	0.0956	2.2632	6	0.8	28.584	0.553	24.51	4.589	23.51
TR09	Kasigau Road	miniature	active	C	Feb_17	2	1.07	0.2	1.3	0.0956	2.2632	6	0.8	28.928	0.471	24.78	4.552	24.51
TR09	Kasigau Road	miniature	active	C	Feb_17	3	1.07	0.2	1.3	0.0956	2.2632	6	0.8	29.277	0.628	25.57	5.118	24.78
TR09	Kasigau Road	miniature	active	C	Feb_17	4	1.07	0.2	1.3	0.0956	2.2632	6	0.8	29.785	0.504	25.05	4.39	25.57
TR09	Kasigau Road	miniature	active	C	Feb_17	5	1.07	0.2	1.3	0.0956	2.2632	6	0.8	29.293	0.699	23.96	4.514	25.05
TR09	Kasigau Road	miniature	active	C	Feb_17	6	1.07	0.2	1.3	0.0956	2.2632	6	0.8	29.029	0.53	23.33	4.289	23.96
TR09	Kasigau Road	miniature	active	C	Feb_17	7	1.07	0.2	1.3	0.0956	2.2632	6	0.8	29.205	0.522	24.18	4.204	23.33
TR09	Kasigau Road	miniature	active	C	Feb_17	8	1.07	0.2	1.3	0.0956	2.2632	6	0.8	29.255	0.52	23.83	3.981	24.18
TR09	Kasigau Road	miniature	active	C	Feb_17	9	1.07	0.2	1.3	0.0956	2.2632	6	0.8	29.229	0.619	24	4.148	23.83
TR09	Kasigau Road	miniature	active	C	Feb_17	10	1.07	0.2	1.3	0.0956	2.2632	6	0.8	28.99	0.54	23.5	3.595	24
TR09	Kasigau Road	miniature	active	C	Feb_17	11	1.07	0.2	1.3	0.0956	2.2632	6	0.8	28.942	0.611	23.6	4.798	23.5
TR09	Kasigau Road	miniature	active	C	Feb_17	12	1.07	0.2	1.3	0.0956	2.2632	6	0.8	29.019	0.871	23.83	6.749	23.6
TR09	Kasigau Road	miniature	active	C	Feb_17	13	1.07	0.2	1.3	0.0956	2.2632	6	0.8	29.712	0.486	24.34	5.381	23.83
TR09	Kasigau Road	miniature	active	C	Feb_17	14	1.07	0.2	1.3	0.0956	2.2632	6	0.8	29.911	0.521	24.5	4.38	24.34
TR09	Kasigau Road	miniature	active	C	Feb_17	15	1.07	0.2	1.3	0.0956	2.2632	6	0.8	29.899	0.486	24.53	5.16	24.5
TR09	Kasigau Road	miniature	active	C	Feb_17	16	1.07	0.2	1.3	0.0956	2.2632	6	0.8	29.712	0.71	24.03	5.625	24.53
TR09	Kasigau Road	miniature	active	C	Feb_17	17	1.07	0.2	1.3	0.0956	2.2632	6	0.8	29.961	0.725	25.01	5.63	24.03
TR09	Kasigau Road	miniature	active	C	Feb_17	18	1.07	0.2	1.3	0.0956	2.2632	6	0.8	30.315	0.559	24.93	4.821	25.01
TR09	Kasigau Road	miniature	active	C	Feb_17	19	1.07	0.2	1.3	0.0956	2.2632	6	0.8	29.101	0.777	24.45	4.714	24.93
TR09	Kasigau Road	miniature	active	C	Feb_17	20	1.07	0.2	1.3	0.0956	2.2632	6	0.8	28	0.575	23.58	3.719	24.45
TR09	Kasigau Road	miniature	active	C	Feb_17	21	1.07	0.2	1.3	0.0956	2.2632	6	0.8	26.958	0.537	24.54	4.684	23.58
TR09	Kasigau Road	miniature	active	C	Feb_17	22	1.07	0.2	1.3	0.0956	2.2632	6	0.8	27.633	0.336	24.03	3.938	24.54
TR09	Kasigau Road	miniature	active	C	Feb_17	23	1.07	0.2	1.3	0.0956	2.2632	6	0.8	28.178	0.63	25.26	3.907	24.03
TR09	Kasigau Road	miniature	active	C	Feb_17	24	1.07	0.2	1.3	0.0956	2.2632	6	0.8	29.361	0.541	25.35	4.045	25.26
TR09	Kasigau Road	miniature	active	C	Feb_17	25	1.07	0.2	1.3	0.0956	2.2632	6	0.8	29.598	0.637	25.01	4.77	25.35
TR09	Kasigau Road	miniature	active	C	Feb_17	26	1.07	0.2	1.3	0.0956	2.2632	6	0.8	29.667	0.563	24.8	5.238	25.01
TR09	Kasigau Road	miniature	active	C	Feb_17	27	1.07	0.2	1.3	0.0956	2.2632	6	0.8	30.137	0.526	25.25	4.481	24.8
TR09	Kasigau Road	miniature	active	C	Feb_17	28	1.07	0.2	1.3	0.0956	2.2632	6	0.8	30.012	0.578	24.96	4.359	25.25
TR09	Kasigau Road	miniature	active	C	Mar_17	1	1.07	0.2	1.3	0.0956	2.2632	6	0.8	30.004	0.486	24.36	3.972	24.96
TR09	Kasigau Road	miniature	active	C	Mar_17	2	1.07	0.2	1.3	0.0956	2.2632	6	0.8	29.825	0.587	23.97	5.604	24.36
TR09	Kasigau Road	miniature	active	C	Mar_17	3	1.07	0.2	1.3	0.0956	2.2632	6	0.8	30.2	0.491	24.76	5.374	23.97
TR09	Kasigau Road	miniature	active	C	Mar_17	4	1.07	0.2	1.3	0.0956	2.2632	6	0.8	30.166	0.58	23.35	3.669	24.76
TR09	Kasigau Road	miniature	active	C	Mar_17	5	1.07	0.2	1.3	0.0956	2.2632	6	0.8	29.961	0.83	25.59	5.689	23.35
TR09	Kasigau Road	miniature	active	C	Mar_17	6	1.07	0.2	1.3	0.0956	2.2632	6	0.8	30.878	0.448	26.55	5.668	25.59
TR09	Kasigau Road	miniature	active	C	Mar_17	7	1.07	0.2	1.3	0.0956	2.2632	6	0.8	31.164	0.524	27.22	5.503	26.55
TR09	Kasigau Road	miniature	active	C	Mar_17	8	1.07	0.2	1.3	0.0956	2.2632	6	0.8	30.992	0.685	25.83	5.799	27.22
TR09	Kasigau Road	miniature	active	C	Mar_17	9	1.07	0.2	1.3	0.0956	2.2632	6	0.8	30.625	0.729	25.9	5.733	25.83
TR09	Kasigau Road	miniature	active	C	Mar_17	10	1.07	0.2	1.3	0.0956	2.2632	6	0.8	31.14	0.541	26.86	5.059	25.9
TR09	Kasigau Road	miniature	active	C	Mar_17	11	1.07	0.2	1.3	0.0956	2.2632	6	0.8	31.001	0.577	25.19	4.89	26.86
TR09	Kasigau Road	miniature	active	C	Mar_17	12	1.07	0.2	1.3	0.0956	2.2632	6	0.8	30.369	0.643	24.26	4.622	25.19
TR09	Kasigau Road	miniature	active	C	Mar_17	13	1.07	0.2	1.3	0.0956	2.2632	6	0.8	30.247	0.62	25.68	6.043	24.26
TR09	Kasigau Road	miniature	active	C	Mar_17	14	1.07	0.2	1.3	0.0956	2.2632	6	0.8	30.683	0.485	25.12	4.842	25.68
TR09	Kasigau Road	miniature	active	C	Mar_17	15	1.07	0.2	1.3	0.0956	2.2632	6	0.8	30.691	0.384	25.65	4.516	25.12
TR09	Kasigau Road	miniature	active	C	Mar_17	16	1.07	0.2	1.3	0.0956	2.2632	6	0.8	30.888	0.51	25.46	5.104	25.65
TR09	Kasigau Road	miniature	active	C	Mar_17	17	1.07	0.2	1.3	0.0956	2.2632	6	0.8	30.597	0.509	24.56	5.413	25.46
TR09	Kasigau Road	miniature	active	C	Mar_17	18	1.07	0.2	1.3	0.0956	2.2632	6	0.8	28.905	0.465	22.52	3.232	24.56
TR09	Kasigau Road	miniature	active	C	Mar_17	19	1.07	0.2	1.3	0.0956	2.2632	6	0.8	29.14	0.729	24.42	3.989	22.52
TR09	Kasigau Road	miniature	active	C	Mar_17	20	1.07	0.2	1.3	0.0956	2.2632	6	0.8	30.029	0.845	24.3	4.401	24.42
TR09	Kasigau Road	miniature	active	C	Mar_17	21	1.07	0.2	1.3	0.0956	2.2632	6	0.8	30.767	0.428	25	3.975	24.3
TR09	Kasigau Road	miniature	active	C	Mar_17	22	1.07	0.2	1.3	0.0956	2.2632	6	0.8	30.858	0.39	24.64	4.032	25
TR09	Kasigau Road	miniature	active	C	Mar_17	23	1.07	0.2	1.3	0.0956	2.2632	6	0.8	30.464	0.506	23.77	3.977	24.64
TR09	Kasigau Road	miniature	active	C	Mar_17	24	1.07	0.2	1.3	0.0956	2.2632	6	0.8	30.041	0.571	24.56	4.218	23.77
TR09	Kasigau Road	miniature	active	C	Mar_17	25	1.07	0.2	1.3	0.0956	2.2632	6	0.8	30.563	0.387	25.85	4.456	24.56
TR09	Kasigau Road	miniature	active	C	Mar_17	26	1.07	0.2	1.3	0.0956	2.2632	6	0.8	30.886	0.348	25.72	4.243	25.85
TR09	Kasigau Road	miniature	active	C	Mar_17	27	1.07	0.2	1.3	0.0956	2.2632	6	0.8	29.94	0.475	24.35	3.353	25.72
TR09	Kasigau Road	miniature	active	C	Mar_17	28	1.07	0.2	1.3	0.0956	2.2632	6	0.8	28.823	0.452	24.22	3.828	24.35
TR09	Kasigau Road	miniature	active	C	Mar_17	29	1.07	0.2	1.3	0.0956	2.2632	6	0.8	28.737	0.426	22.55	3.838	24.22
TR09	Kasigau Road	miniature	active	C	Mar_17	30	1.07	0.2	1.3	0.0956	2.2632	6	0.8	28.604	0.428	24.15	4.364	22.55
TR09	Kasigau Road	miniature	active	C	Mar_17	31	1.07	0.2	1.3	0.0956	2.2632	6	0.8	28.994	0.358	24.02	4.141	24.15
TR10	Kasigau Road	large	active	A	Mar_16	1	0.61	0.24	3.1	1.0349	11.4231	30	3.1	29.375	0.169	23.43	3.973	22.89
TR10	Kasigau Road	large	active	A	Mar_16	2	0.61	0.24	3.1	1.0349	11.4231	30	3.1	29.04	0.37	24.92	5.164	23.43
TR10	Kasigau Road	large	active	A	Mar_16	3	0.61	0.24	3.1	1.0349	11.4231	30	3.1	29.243	0.289	24.8	3.991	24.92
TR10	Kasigau Road	large	active	A	Mar_16	4	0.61	0.24	3.1	1.0349	11.4231	30	3.1	29.54	0.267	25.01	4.385	24.8
TR10	Kasigau Road	large	active	A	Mar_16	5	0.61	0.24	3.1	1.0349	11.4231	30	3.1	29.531	0.203	24.28	5.121	25.01
TR10	Kasigau Road	large	active	A	Mar_16	6	0.61	0.24	3.1	1.0349	11.4231	30	3.1	29.788	0.176	25.24	5.036	24.28
TR10	Kasigau Road	large	active	A	Mar_16	7	0.61	0.24	3.1	1.0349	11.4231	30	3.1	30.124	0.303	25.41	4.452	25.24
TR10	Kasigau Road	large	active	A	Mar_16	8	0.61	0.24	3.1	1.0349	11.4231	30	3.1	29.812	0.389	25.67	5.154	25.41
TR10	Kasigau Road	large	active	A	Mar_16	9	0.61	0.24	3.1	1.0349	11.4231	30	3.1	29.741	0.121	24.48	3.963	25.67
TR10	Kasigau Road	large	active	A	Mar_16	10	0.61	0.24	3.1	1.0349	11.4231	30	3.1	29.093	0.376	22.8	4.435	24.48
TR10	Kasigau Road	large	active	A	Mar_16	11	0.61	0.24	3.1	1.0349	11.4231	30	3.1	28.907	0.172	25.63	4.472	22.8
TR10	Kasigau Road	large	active	A	Mar_16	12	0.61	0.24	3.1	1.0349	11.4231	30	3.1	28.905	0.184	25.95	4.289	25.63
TR10	Kasigau Road	large	active	A	Mar_16	13	0.61	0.24	3.1	1.0349	11.4231	30	3.1	28.671	0.185	24.95	6.024	25.95
TR10	Kasigau Road	large	active	A	Mar_16	14	0.61	0.24	3.1	1.0349	11.4231	30	3.1	29.18	0.356	25.95	4.829	24.95
TR10	Kasigau Road	large	active	A	Mar_16	15	0.61	0.24	3.1	1.0349	11.4231	30	3.1	29.306	0.14	25.48	5.016	25.95
TR10	Kasigau Road	large	active	A	Mar_16	16	0.61	0.24	3.1	1.0349	11.4231	30	3.1	29.694	0.058	25.93	5.507	25.48
TR10	Kasigau Road	large	active	A	Mar_16	17	0.61	0.24	3.1	1.0349	11.4231	30	3.1	30.172	0.375	25.44	4.363	25.93
TR10	Kasigau Road	large	active	A	Mar_16	18	0.61	0.24	3.1	1.0349	11.4231	30	3.1	29.991	0.289	26.16	3.938	25.44
TR10	Kasigau Road	large	active	A	Mar_16	19	0.61	0.24	3.1	1.0349	11.4231	30	3.1	29.461	0.301	25.19	4.529	26.16
TR10	Kasigau Road	large	active	A	Mar_16	20	0.61	0.24	3.1	1.0349	11.4231	30	3.1	29.6	0.121	26.1	4.998	25.19
TR10	Kasigau Road	large	active	A	Mar_16	21	0.61	0.24	3.1	1.0349	11.4231	30	3.1	29.655	0.202	26.15	4.351	26.1
TR10	Kasigau Road	large	active	A	Mar_16	22	0.61	0.24	3.1	1.0349	11.4231	30	3.1	29.119	0.416	26.29	4.692	26.15
TR10	Kasigau Road	large	active	A	Mar_16	23	0.61	0.24	3.1	1.0349	11.4231	30	3.1	29.367	0.199	26.48	4.831	26.29
TR10	Kasigau Road	large	active	A	Mar_16	24	0.61	0.24	3.1	1.0349	11.4231	30	3.1	29.157	0.461	26.21	5.129	26.48
TR10	Kasigau Road	large	active	A	Mar_16	25	0.61	0.24	3.1	1.0349	11.4231	30	3.1	28.702	0.481	24.12	4.279	26.21
TR10	Kasigau Road	large	active	A	Mar_16	26	0.61	0.24	3.1	1.0349	11.4231	30	3.1	28.015	0.388	24.51	4.704	24.12
TR10	Kasigau Road	large	active	A	Mar_16	27	0.61	0.24	3.1	1.0349	11.4231	30	3.1	28.478	0.228	25.63	5.669	24.51
TR10	Kasigau Road	large	active	A	Mar_16	28	0.61	0.24	3.1	1.0349	11.4231	30	3.1	29.444	0.154	27.04	5.613	25.63
TR10	Kasigau Road	large	active	A	Mar_16	29	0.61	0.24	3.1	1.0349	11.4231	30	3.1	30.187	0.257	26.84	4.98	27.04
TR10	Kasigau Road	large	active	A	Mar_16	30	0.61	0.24	3.1	1.0349	11.4231	30	3.1	29.999	0.259	26.75	4.903	26.84
TR10	Kasigau Road	large	active	A	Mar_16	31	0.61	0.24	3.1	1.0349	11.4231	30	3.1	30.07	0.322	26.8	4.922	26.75
TR10	Kasigau Road	large	active	A	Apr_16	1	0.61	0.24	3.1	1.0349	11.4231	30	3.1	29.945	0.372	23.6	1.852	26.8
TR10	Kasigau Road	large	active	A	Apr_16	2	0.61	0.24	3.1	1.0349	11.4231	30	3.1	29.719	0.565	21.14	1.049	23.6
TR10	Kasigau Road	large	active	A	Apr_16	3	0.61	0.24	3.1	1.0349	11.4231	30	3.1	28.329	0.243	22.39	2.419	21.14
TR10	Kasigau Road	large	active	A	Apr_16	4	0.61	0.24	3.1	1.0349	11.4231	30	3.1	28.257	0.058	21.78	2.927	22.39
TR10	Kasigau Road	large	active	A	Apr_16	5	0.61	0.24	3.1	1.0349	11.4231	30	3.1	28.343	0.116	21.91	2.777	21.78
TR10	Kasigau Road	large	active	A	Apr_16	6	0.61	0.24	3.1	1.0349	11.4231	30	3.1	28.476	0.132	23.23	2.858	21.91
TR10	Kasigau Road	large	active	A	Apr_16	7	0.61	0.24	3.1	1.0349	11.4231	30	3.1	28.483	0.153	23.14	4.322	23.23
TR10	Kasigau Road	large	active	A	Apr_16	8	0.61	0.24	3.1	1.0349	11.4231	30	3.1	28.929	0.325	23.73	3.852	23.14
TR10	Kasigau Road	large	active	A	Apr_16	9	0.61	0.24	3.1	1.0349	11.4231	30	3.1	28.86	0.436	22.65	3.831	23.73
TR10	Kasigau Road	large	active	A	Apr_16	10	0.61	0.24	3.1	1.0349	11.4231	30	3.1	28.452	0.083	22.79	3.38	22.65
TR10	Kasigau Road	large	active	A	Apr_16	11	0.61	0.24	3.1	1.0349	11.4231	30	3.1	28.577	0.153	22.33	2.8	22.79
TR10	Kasigau Road	large	active	A	Apr_16	12	0.61	0.24	3.1	1.0349	11.4231	30	3.1	28.454	0.221	22.84	3.418	22.33
TR10	Kasigau Road	large	active	A	Apr_16	13	0.61	0.24	3.1	1.0349	11.4231	30	3.1	28.236	0.11	22.43	2.799	22.84
TR10	Kasigau Road	large	active	A	Apr_16	14	0.61	0.24	3.1	1.0349	11.4231	30	3.1	28.468	0.124	22.41	2.834	22.43
TR10	Kasigau Road	large	active	A	Apr_16	15	0.61	0.24	3.1	1.0349	11.4231	30	3.1	28.562	0.176	22.64	2.81	22.41
TR10	Kasigau Road	large	active	A	Apr_16	16	0.61	0.24	3.1	1.0349	11.4231	30	3.1	28.489	0.249	21.35	1.754	22.64
TR10	Kasigau Road	large	active	A	Apr_16	17	0.61	0.24	3.1	1.0349	11.4231	30	3.1	27.727	0.24	22.26	2.866	21.35
TR10	Kasigau Road	large	active	A	Apr_16	18	0.61	0.24	3.1	1.0349	11.4231	30	3.1	27.916	0.405	23.04	3.842	22.26
TR10	Kasigau Road	large	active	A	Apr_16	19	0.61	0.24	3.1	1.0349	11.4231	30	3.1	28.232	0.34	24.12	3.978	23.04
TR10	Kasigau Road	large	active	A	Apr_16	20	0.61	0.24	3.1	1.0349	11.4231	30	3.1	28.452	0.14	23.96	3.562	24.12
TR10	Kasigau Road	large	active	A	Apr_16	21	0.61	0.24	3.1	1.0349	11.4231	30	3.1	28.562	0.152	22.69	2.73	23.96
TR10	Kasigau Road	large	active	A	Apr_16	22	0.61	0.24	3.1	1.0349	11.4231	30	3.1	28.624	0.179	22.81	2.829	22.69
TR10	Kasigau Road	large	active	A	Apr_16	23	0.61	0.24	3.1	1.0349	11.4231	30	3.1	28.546	0.168	23.57	2.962	22.81
TR10	Kasigau Road	large	active	A	Apr_16	24	0.61	0.24	3.1	1.0349	11.4231	30	3.1	28.237	0.296	23.63	3.284	23.57
TR10	Kasigau Road	large	active	A	Apr_16	25	0.61	0.24	3.1	1.0349	11.4231	30	3.1	27.58	0.505	22.84	2.93	23.63
TR10	Kasigau Road	large	active	A	Apr_16	26	0.61	0.24	3.1	1.0349	11.4231	30	3.1	27.414	0.187	22.61	3.698	22.84
TR10	Kasigau Road	large	active	A	Apr_16	27	0.61	0.24	3.1	1.0349	11.4231	30	3.1	26.867	0.427	22.2	3.34	22.61
TR10	Kasigau Road	large	active	A	Apr_16	28	0.61	0.24	3.1	1.0349	11.4231	30	3.1	26.696	0.235	21.62	3.225	22.2
TR10	Kasigau Road	large	active	A	Apr_16	29	0.61	0.24	3.1	1.0349	11.4231	30	3.1	26.679	0.15	21.67	2.683	21.62
TR10	Kasigau Road	large	active	A	Apr_16	30	0.61	0.24	3.1	1.0349	11.4231	30	3.1	27.057	0.319	22.2	3.227	21.67
TR10	Kasigau Road	large	active	A	May_16	1	0.61	0.24	3.1	1.0349	11.4231	30	3.1	27.392	0.186	22.71	3.999	22.2
TR10	Kasigau Road	large	active	A	May_16	2	0.61	0.24	3.1	1.0349	11.4231	30	3.1	27.367	0.182	22.56	4.319	22.71
TR10	Kasigau Road	large	active	A	May_16	3	0.61	0.24	3.1	1.0349	11.4231	30	3.1	27.422	0.159	22.82	4.201	22.56
TR10	Kasigau Road	large	active	A	May_16	4	0.61	0.24	3.1	1.0349	11.4231	30	3.1	27.609	0.132	23.27	4.166	22.82
TR10	Kasigau Road	large	active	A	May_16	5	0.61	0.24	3.1	1.0349	11.4231	30	3.1	27.933	0.352	21.78	1.996	23.27
TR10	Kasigau Road	large	active	A	May_16	6	0.61	0.24	3.1	1.0349	11.4231	30	3.1	26.915	0.553	21.56	3.44	21.78
TR10	Kasigau Road	large	active	A	May_16	7	0.61	0.24	3.1	1.0349	11.4231	30	3.1	25.698	0.507	21.09	4.205	21.56
TR10	Kasigau Road	large	active	A	May_16	8	0.61	0.24	3.1	1.0349	11.4231	30	3.1	25.198	0.258	21.52	4.328	21.09
TR10	Kasigau Road	large	active	A	May_16	9	0.61	0.24	3.1	1.0349	11.4231	30	3.1	25.497	0.201	20.94	4.019	21.52
TR10	Kasigau Road	large	active	A	May_16	10	0.61	0.24	3.1	1.0349	11.4231	30	3.1	25.649	0.085	19.55	1.796	20.94
TR10	Kasigau Road	large	active	A	May_16	11	0.61	0.24	3.1	1.0349	11.4231	30	3.1	26.065	0.193	20.98	3.553	19.55
TR10	Kasigau Road	large	active	A	May_16	12	0.61	0.24	3.1	1.0349	11.4231	30	3.1	26.422	0.179	21.1	3.779	20.98
TR10	Kasigau Road	large	active	A	May_16	13	0.61	0.24	3.1	1.0349	11.4231	30	3.1	26.765	0.117	20.84	3.716	21.1
TR10	Kasigau Road	large	active	A	May_16	14	0.61	0.24	3.1	1.0349	11.4231	30	3.1	27.241	0.431	21.36	3.399	20.84
TR10	Kasigau Road	large	active	A	May_16	15	0.61	0.24	3.1	1.0349	11.4231	30	3.1	27.1	0.431	22.06	4.524	21.36
TR10	Kasigau Road	large	active	A	May_16	16	0.61	0.24	3.1	1.0349	11.4231	30	3.1	27.146	0.278	22.31	4.693	22.06
TR10	Kasigau Road	large	active	A	May_16	17	0.61	0.24	3.1	1.0349	11.4231	30	3.1	27.57	0.131	23.02	4.253	22.31
TR10	Kasigau Road	large	active	A	May_16	18	0.61	0.24	3.1	1.0349	11.4231	30	3.1	27.815	0.224	22.02	3.383	23.02
TR10	Kasigau Road	large	active	A	May_16	19	0.61	0.24	3.1	1.0349	11.4231	30	3.1	27.282	0.322	21.05	3.703	22.02
TR10	Kasigau Road	large	active	A	May_16	20	0.61	0.24	3.1	1.0349	11.4231	30	3.1	26.579	0.334	21.48	4.843	21.05
TR10	Kasigau Road	large	active	A	May_16	21	0.61	0.24	3.1	1.0349	11.4231	30	3.1	26.461	0.049	19.67	1.985	21.48
TR10	Kasigau Road	large	active	A	May_16	22	0.61	0.24	3.1	1.0349	11.4231	30	3.1	26.361	0.196	21.43	3.524	19.67
TR10	Kasigau Road	large	active	A	May_16	23	0.61	0.24	3.1	1.0349	11.4231	30	3.1	26.07	0.241	20.1	2.993	21.43
TR10	Kasigau Road	large	active	A	May_16	24	0.61	0.24	3.1	1.0349	11.4231	30	3.1	25.688	0.197	20.71	4.119	20.1
TR10	Kasigau Road	large	active	A	May_16	25	0.61	0.24	3.1	1.0349	11.4231	30	3.1	25.719	0.159	21.31	4.309	20.71
TR10	Kasigau Road	large	active	A	May_16	26	0.61	0.24	3.1	1.0349	11.4231	30	3.1	26.021	0.6	20.22	3.705	21.31
TR10	Kasigau Road	large	active	A	May_16	27	0.61	0.24	3.1	1.0349	11.4231	30	3.1	25.109	0.388	20.55	4.209	20.22
TR10	Kasigau Road	large	active	A	May_16	28	0.61	0.24	3.1	1.0349	11.4231	30	3.1	24.846	0.147	20.74	4.643	20.55
TR10	Kasigau Road	large	active	A	May_16	29	0.61	0.24	3.1	1.0349	11.4231	30	3.1	25.379	0.263	20.84	4.949	20.74
TR10	Kasigau Road	large	active	A	May_16	30	0.61	0.24	3.1	1.0349	11.4231	30	3.1	25.656	0.162	21.71	4.818	20.84
TR10	Kasigau Road	large	active	A	May_16	31	0.61	0.24	3.1	1.0349	11.4231	30	3.1	26.313	0.142	22.43	4.546	21.71
TR10	Kasigau Road	large	active	A	Jun_16	1	0.61	0.24	3.1	1.0349	11.4231	30	3.1	26.726	0.082	22.3	4.367	22.43
TR10	Kasigau Road	large	active	A	Jun_16	2	0.61	0.24	3.1	1.0349	11.4231	30	3.1	26.719	0.149	22.38	4.012	22.3
TR10	Kasigau Road	large	active	A	Jun_16	3	0.61	0.24	3.1	1.0349	11.4231	30	3.1	26.609	0.153	21	3.155	22.38
TR10	Kasigau Road	large	active	A	Jun_16	4	0.61	0.24	3.1	1.0349	11.4231	30	3.1	26.426	0.231	21.84	4.093	21
TR10	Kasigau Road	large	active	A	Jun_16	5	0.61	0.24	3.1	1.0349	11.4231	30	3.1	26.328	0.108	22.06	4.417	21.84
TR10	Kasigau Road	large	active	A	Jun_16	6	0.61	0.24	3.1	1.0349	11.4231	30	3.1	26.578	0.2	21.82	4.116	22.06
TR10	Kasigau Road	large	active	A	Jun_16	7	0.61	0.24	3.1	1.0349	11.4231	30	3.1	26.338	0.253	21.65	4.477	21.82
TR10	Kasigau Road	large	active	A	Jun_16	8	0.61	0.24	3.1	1.0349	11.4231	30	3.1	26.039	0.221	21.01	4.912	21.65
TR10	Kasigau Road	large	active	A	Jun_16	9	0.61	0.24	3.1	1.0349	11.4231	30	3.1	25.563	0.339	20.5	4.626	21.01
TR10	Kasigau Road	large	active	A	Jun_16	10	0.61	0.24	3.1	1.0349	11.4231	30	3.1	25.086	0.158	20.66	4.506	20.5
TR10	Kasigau Road	large	active	A	Jun_16	11	0.61	0.24	3.1	1.0349	11.4231	30	3.1	25.422	0.198	20.55	3.203	20.66
TR10	Kasigau Road	large	active	A	Jun_16	12	0.61	0.24	3.1	1.0349	11.4231	30	3.1	25.805	0.108	20.93	3.098	20.55
TR10	Kasigau Road	large	active	A	Jun_16	13	0.61	0.24	3.1	1.0349	11.4231	30	3.1	25.477	0.288	20.1	4.037	20.93
TR10	Kasigau Road	large	active	A	Jun_16	14	0.61	0.24	3.1	1.0349	11.4231	30	3.1	24.674	0.46	20.63	5.877	20.1
TR10	Kasigau Road	large	active	A	Jun_16	15	0.61	0.24	3.1	1.0349	11.4231	30	3.1	25.241	0.278	21.33	5.05	20.63
TR10	Kasigau Road	large	active	A	Jun_16	16	0.61	0.24	3.1	1.0349	11.4231	30	3.1	25.917	0.15	21.26	4.16	21.33
TR10	Kasigau Road	large	active	A	Jun_16	17	0.61	0.24	3.1	1.0349	11.4231	30	3.1	26.299	0.192	21.22	5.061	21.26
TR10	Kasigau Road	large	active	A	Jun_16	18	0.61	0.24	3.1	1.0349	11.4231	30	3.1	26.75	0.124	21.57	3.731	21.22
TR10	Kasigau Road	large	active	A	Jun_16	19	0.61	0.24	3.1	1.0349	11.4231	30	3.1	26.932	0.143	21.48	3.85	21.57
TR10	Kasigau Road	large	active	A	Jun_16	20	0.61	0.24	3.1	1.0349	11.4231	30	3.1	26.828	0.076	20.84	3.191	21.48
TR10	Kasigau Road	large	active	A	Jun_16	21	0.61	0.24	3.1	1.0349	11.4231	30	3.1	26.221	0.395	20.16	3.267	20.84
TR10	Kasigau Road	large	active	A	Jun_16	22	0.61	0.24	3.1	1.0349	11.4231	30	3.1	25.61	0.121	19.21	1.849	20.16
TR10	Kasigau Road	large	active	A	Jun_16	23	0.61	0.24	3.1	1.0349	11.4231	30	3.1	25.133	0.27	20.49	3.64	19.21
TR10	Kasigau Road	large	active	A	Jun_16	24	0.61	0.24	3.1	1.0349	11.4231	30	3.1	24.988	0.496	19.56	3.248	20.49
TR10	Kasigau Road	large	active	A	Jun_16	25	0.61	0.24	3.1	1.0349	11.4231	30	3.1	24.805	0.03	19.82	3.134	19.56
TR10	Kasigau Road	large	active	A	Jun_16	26	0.61	0.24	3.1	1.0349	11.4231	30	3.1	25.197	0.243	20.5	3.501	19.82
TR10	Kasigau Road	large	active	A	Jun_16	27	0.61	0.24	3.1	1.0349	11.4231	30	3.1	25.343	0.191	20.62	3.71	20.5
TR10	Kasigau Road	large	active	A	Jun_16	28	0.61	0.24	3.1	1.0349	11.4231	30	3.1	25.245	0.079	20.83	4.843	20.62
TR10	Kasigau Road	large	active	A	Jun_16	29	0.61	0.24	3.1	1.0349	11.4231	30	3.1	25.399	0.237	20.03	3.563	20.83
TR10	Kasigau Road	large	active	A	Jun_16	30	0.61	0.24	3.1	1.0349	11.4231	30	3.1	25.133	0.532	20.15	4.417	20.03
TR10	Kasigau Road	large	active	A	Jul_16	1	0.61	0.24	3.1	1.0349	11.4231	30	3.1	24.887	0.398	19.88	4.258	20.15
TR10	Kasigau Road	large	active	A	Jul_16	2	0.61	0.24	3.1	1.0349	11.4231	30	3.1	25.137	0.272	20.31	3.403	19.88
TR10	Kasigau Road	large	active	A	Jul_16	3	0.61	0.24	3.1	1.0349	11.4231	30	3.1	25.319	0.195	20.18	3.939	20.31
TR10	Kasigau Road	large	active	A	Jul_16	4	0.61	0.24	3.1	1.0349	11.4231	30	3.1	24.693	0.496	19.89	5.514	20.18
TR10	Kasigau Road	large	active	A	Jul_16	5	0.61	0.24	3.1	1.0349	11.4231	30	3.1	24.492	0.146	19.44	4.345	19.89
TR10	Kasigau Road	large	active	A	Jul_16	6	0.61	0.24	3.1	1.0349	11.4231	30	3.1	24.563	0.093	19.06	3.391	19.44
TR10	Kasigau Road	large	active	A	Jul_16	7	0.61	0.24	3.1	1.0349	11.4231	30	3.1	24.469	0.231	18.66	3.3	19.06
TR10	Kasigau Road	large	active	A	Jul_16	8	0.61	0.24	3.1	1.0349	11.4231	30	3.1	24.399	0.161	18.39	3.012	18.66
TR10	Kasigau Road	large	active	A	Jul_16	9	0.61	0.24	3.1	1.0349	11.4231	30	3.1	23.854	0.409	18.32	4.17	18.39
TR10	Kasigau Road	large	active	A	Jul_16	10	0.61	0.24	3.1	1.0349	11.4231	30	3.1	23.649	0.091	18.63	3.257	18.32
TR10	Kasigau Road	large	active	A	Jul_16	11	0.61	0.24	3.1	1.0349	11.4231	30	3.1	23.656	0.216	18.18	3.085	18.63
TR10	Kasigau Road	large	active	A	Jul_16	12	0.61	0.24	3.1	1.0349	11.4231	30	3.1	23.314	0.35	17.61	2.89	18.18
TR10	Kasigau Road	large	active	A	Jul_16	13	0.61	0.24	3.1	1.0349	11.4231	30	3.1	22.765	0.108	18.38	3.212	17.61
TR10	Kasigau Road	large	active	A	Jul_16	14	0.61	0.24	3.1	1.0349	11.4231	30	3.1	23.064	0.212	18.88	4.681	18.38
TR10	Kasigau Road	large	active	A	Jul_16	15	0.61	0.24	3.1	1.0349	11.4231	30	3.1	23.539	0.098	18.3	3.217	18.88
TR10	Kasigau Road	large	active	A	Jul_16	16	0.61	0.24	3.1	1.0349	11.4231	30	3.1	23.846	0.144	19.4	3.132	18.3
TR10	Kasigau Road	large	active	A	Jul_16	17	0.61	0.24	3.1	1.0349	11.4231	30	3.1	24.247	0.235	20.23	3.91	19.4
TR10	Kasigau Road	large	active	A	Jul_16	18	0.61	0.24	3.1	1.0349	11.4231	30	3.1	24.321	0.091	19.11	3.37	20.23
TR10	Kasigau Road	large	active	A	Jul_16	19	0.61	0.24	3.1	1.0349	11.4231	30	3.1	24.447	0.199	19.63	4.28	19.11
TR10	Kasigau Road	large	active	A	Jul_16	20	0.61	0.24	3.1	1.0349	11.4231	30	3.1	24.247	0.323	19.55	5.141	19.63
TR10	Kasigau Road	large	active	A	Jul_16	21	0.61	0.24	3.1	1.0349	11.4231	30	3.1	24.399	0.141	19.75	4.401	19.55
TR10	Kasigau Road	large	active	A	Jul_16	22	0.61	0.24	3.1	1.0349	11.4231	30	3.1	24.649	0.134	20.45	4.583	19.75
TR10	Kasigau Road	large	active	A	Jul_16	23	0.61	0.24	3.1	1.0349	11.4231	30	3.1	24.688	0.265	20.92	5.429	20.45
TR10	Kasigau Road	large	active	A	Jul_16	24	0.61	0.24	3.1	1.0349	11.4231	30	3.1	25.391	0.221	20.37	4.875	20.92
TR10	Kasigau Road	large	active	A	Jul_16	25	0.61	0.24	3.1	1.0349	11.4231	30	3.1	26.353	0.178	20.23	3.148	20.37
TR10	Kasigau Road	large	active	A	Jul_16	26	0.61	0.24	3.1	1.0349	11.4231	30	3.1	26.252	0.163	20.24	4.69	20.23
TR10	Kasigau Road	large	active	A	Jul_16	27	0.61	0.24	3.1	1.0349	11.4231	30	3.1	26.237	0.164	21.07	4.639	20.24
TR10	Kasigau Road	large	active	A	Jul_16	28	0.61	0.24	3.1	1.0349	11.4231	30	3.1	26.275	0.327	20.13	4.646	21.07
TR10	Kasigau Road	large	active	A	Jul_16	29	0.61	0.24	3.1	1.0349	11.4231	30	3.1	26.32	0.085	20.85	4.252	20.13
TR10	Kasigau Road	large	active	A	Jul_16	30	0.61	0.24	3.1	1.0349	11.4231	30	3.1	25.854	0.415	20.44	5.177	20.85
TR10	Kasigau Road	large	active	A	Jul_16	31	0.61	0.24	3.1	1.0349	11.4231	30	3.1	25.307	0.387	20.3	6.04	20.44
TR10	Kasigau Road	large	active	A	Aug_16	1	0.61	0.24	3.1	1.0349	11.4231	30	3.1	24.87	0.468	20.1	4.903	20.3
TR10	Kasigau Road	large	active	A	Aug_16	2	0.61	0.24	3.1	1.0349	11.4231	30	3.1	24.432	0.405	20.05	6.451	20.1
TR10	Kasigau Road	large	active	A	Aug_16	3	0.61	0.24	3.1	1.0349	11.4231	30	3.1	24.571	0.226	20.26	5.908	20.05
TR10	Kasigau Road	large	active	A	Aug_16	4	0.61	0.24	3.1	1.0349	11.4231	30	3.1	25.396	0.31	20.64	4.101	20.26
TR10	Kasigau Road	large	active	A	Aug_16	5	0.61	0.24	3.1	1.0349	11.4231	30	3.1	25.304	0.226	18.55	3.409	20.64
TR10	Kasigau Road	large	active	A	Aug_16	6	0.61	0.24	3.1	1.0349	11.4231	30	3.1	24.706	0.264	19.75	3.35	18.55
TR10	Kasigau Road	large	active	A	Aug_16	7	0.61	0.24	3.1	1.0349	11.4231	30	3.1	24.688	0.068	19.21	3.765	19.75
TR10	Kasigau Road	large	active	A	Aug_16	8	0.61	0.24	3.1	1.0349	11.4231	30	3.1	25.01	0.16	19.46	2.808	19.21
TR10	Kasigau Road	large	active	A	Aug_16	9	0.61	0.24	3.1	1.0349	11.4231	30	3.1	24.948	0.235	18.49	1.881	19.46
TR10	Kasigau Road	large	active	A	Aug_16	10	0.61	0.24	3.1	1.0349	11.4231	30	3.1	24.512	0.305	18.7	5.09	18.49
TR10	Kasigau Road	large	active	A	Aug_16	11	0.61	0.24	3.1	1.0349	11.4231	30	3.1	24.314	0.191	19.6	4.064	18.7
TR10	Kasigau Road	large	active	A	Aug_16	12	0.61	0.24	3.1	1.0349	11.4231	30	3.1	24.539	0.076	19.36	3.986	19.6
TR10	Kasigau Road	large	active	A	Aug_16	13	0.61	0.24	3.1	1.0349	11.4231	30	3.1	24.939	0.355	20.19	3.357	19.36
TR10	Kasigau Road	large	active	A	Aug_16	14	0.61	0.24	3.1	1.0349	11.4231	30	3.1	25.399	0.115	19.46	3.423	20.19
TR10	Kasigau Road	large	active	A	Aug_16	15	0.61	0.24	3.1	1.0349	11.4231	30	3.1	26.09	0.402	19.38	2.605	19.46
TR10	Kasigau Road	large	active	A	Aug_16	16	0.61	0.24	3.1	1.0349	11.4231	30	3.1	26.004	0.315	18.93	3.28	19.38
TR10	Kasigau Road	large	active	A	Aug_16	17	0.61	0.24	3.1	1.0349	11.4231	30	3.1	26.057	0.194	20.84	4.883	18.93
TR10	Kasigau Road	large	active	A	Aug_16	18	0.61	0.24	3.1	1.0349	11.4231	30	3.1	26.562	0.146	20.09	4.579	20.84
TR10	Kasigau Road	large	active	A	Aug_16	19	0.61	0.24	3.1	1.0349	11.4231	30	3.1	27.167	0.267	21.04	4.841	20.09
TR10	Kasigau Road	large	active	A	Aug_16	20	0.61	0.24	3.1	1.0349	11.4231	30	3.1	27.351	0.088	20.58	4.201	21.04
TR10	Kasigau Road	large	active	A	Aug_16	21	0.61	0.24	3.1	1.0349	11.4231	30	3.1	27.33	0.423	19.82	5.555	20.58
TR10	Kasigau Road	large	active	A	Aug_16	22	0.61	0.24	3.1	1.0349	11.4231	30	3.1	27.382	0.191	21.08	4.831	19.82
TR10	Kasigau Road	large	active	A	Aug_16	23	0.61	0.24	3.1	1.0349	11.4231	30	3.1	27.854	0.418	20.64	4.584	21.08
TR10	Kasigau Road	large	active	A	Aug_16	24	0.61	0.24	3.1	1.0349	11.4231	30	3.1	27.007	0.503	19.38	4.883	20.64
TR10	Kasigau Road	large	active	A	Aug_16	25	0.61	0.24	3.1	1.0349	11.4231	30	3.1	26.609	0.207	18.64	4.909	19.38
TR10	Kasigau Road	large	active	A	Aug_16	26	0.61	0.24	3.1	1.0349	11.4231	30	3.1	26.484	0.168	19.05	3.525	18.64
TR10	Kasigau Road	large	active	A	Aug_16	27	0.61	0.24	3.1	1.0349	11.4231	30	3.1	26.151	0.186	19.51	3.79	19.05
TR10	Kasigau Road	large	active	A	Aug_16	28	0.61	0.24	3.1	1.0349	11.4231	30	3.1	26.523	0.141	20.31	3.858	19.51
TR10	Kasigau Road	large	active	A	Aug_16	29	0.61	0.24	3.1	1.0349	11.4231	30	3.1	26.75	0.081	18.48	3.45	20.31
TR10	Kasigau Road	large	active	A	Aug_16	30	0.61	0.24	3.1	1.0349	11.4231	30	3.1	26.323	0.336	18.86	4.54	18.48
TR10	Kasigau Road	large	active	A	Aug_16	31	0.61	0.24	3.1	1.0349	11.4231	30	3.1	26.302	0.249	19.68	4.775	18.86
TR10	Kasigau Road	large	active	A	Sep_16	1	0.61	0.24	3.1	1.0349	11.4231	30	3.1	26.197	0.309	17.19	2.196	19.68
TR10	Kasigau Road	large	active	A	Sep_16	2	0.61	0.24	3.1	1.0349	11.4231	30	3.1	25.555	0.179	18.73	3.353	17.19
TR10	Kasigau Road	large	active	A	Sep_16	3	0.61	0.24	3.1	1.0349	11.4231	30	3.1	25.325	0.224	19.33	3.826	18.73
TR10	Kasigau Road	large	active	A	Sep_16	4	0.61	0.24	3.1	1.0349	11.4231	30	3.1	25.524	0.17	19.75	4.37	19.33
TR10	Kasigau Road	large	active	A	Sep_16	5	0.61	0.24	3.1	1.0349	11.4231	30	3.1	26.319	0.282	18.92	3.233	19.75
TR10	Kasigau Road	large	active	A	Sep_16	6	0.61	0.24	3.1	1.0349	11.4231	30	3.1	26.305	0.319	19.81	3.632	18.92
TR10	Kasigau Road	large	active	A	Sep_16	7	0.61	0.24	3.1	1.0349	11.4231	30	3.1	26.476	0.093	19.52	2.923	19.81
TR10	Kasigau Road	large	active	A	Sep_16	8	0.61	0.24	3.1	1.0349	11.4231	30	3.1	26.541	0.211	20.53	5.917	19.52
TR10	Kasigau Road	large	active	A	Sep_16	9	0.61	0.24	3.1	1.0349	11.4231	30	3.1	27.232	0.285	21.04	4.37	20.53
TR10	Kasigau Road	large	active	A	Sep_16	10	0.61	0.24	3.1	1.0349	11.4231	30	3.1	27.57	0.073	18.8	3.838	21.04
TR10	Kasigau Road	large	active	A	Sep_16	11	0.61	0.24	3.1	1.0349	11.4231	30	3.1	27.484	0.163	20.42	5.239	18.8
TR10	Kasigau Road	large	active	A	Sep_16	12	0.61	0.24	3.1	1.0349	11.4231	30	3.1	27.86	0.155	21.34	4.56	20.42
TR10	Kasigau Road	large	active	A	Sep_16	13	0.61	0.24	3.1	1.0349	11.4231	30	3.1	27.625	0.225	19.96	5.583	21.34
TR10	Kasigau Road	large	active	A	Sep_16	14	0.61	0.24	3.1	1.0349	11.4231	30	3.1	27.531	0.087	19.25	2.799	19.96
TR10	Kasigau Road	large	active	A	Sep_16	15	0.61	0.24	3.1	1.0349	11.4231	30	3.1	27.393	0.184	21.3	4.757	19.25
TR10	Kasigau Road	large	active	A	Sep_16	16	0.61	0.24	3.1	1.0349	11.4231	30	3.1	27.648	0.141	20.86	4.164	21.3
TR10	Kasigau Road	large	active	A	Sep_16	17	0.61	0.24	3.1	1.0349	11.4231	30	3.1	27.518	0.223	21.23	5.243	20.86
TR10	Kasigau Road	large	active	A	Sep_16	18	0.61	0.24	3.1	1.0349	11.4231	30	3.1	27.29	0.202	20.06	4.882	21.23
TR10	Kasigau Road	large	active	A	Sep_16	19	0.61	0.24	3.1	1.0349	11.4231	30	3.1	26.914	0.433	20.41	5.113	20.06
TR10	Kasigau Road	large	active	A	Sep_16	20	0.61	0.24	3.1	1.0349	11.4231	30	3.1	26.757	0.138	19.76	4.752	20.41
TR10	Kasigau Road	large	active	A	Sep_16	21	0.61	0.24	3.1	1.0349	11.4231	30	3.1	26.57	0.178	20.31	4.627	19.76
TR10	Kasigau Road	large	active	A	Sep_16	22	0.61	0.24	3.1	1.0349	11.4231	30	3.1	26.469	0.189	20	4.635	20.31
TR10	Kasigau Road	large	active	A	Sep_16	23	0.61	0.24	3.1	1.0349	11.4231	30	3.1	26.804	0.162	20.58	3.99	20
TR10	Kasigau Road	large	active	A	Sep_16	24	0.61	0.24	3.1	1.0349	11.4231	30	3.1	27.375	0.146	20.71	3.641	20.58
TR10	Kasigau Road	large	active	A	Sep_16	25	0.61	0.24	3.1	1.0349	11.4231	30	3.1	27.703	0.165	21.79	4.683	20.71
TR10	Kasigau Road	large	active	A	Sep_16	26	0.61	0.24	3.1	1.0349	11.4231	30	3.1	27.664	0.227	21.34	4.984	21.79
TR10	Kasigau Road	large	active	A	Sep_16	27	0.61	0.24	3.1	1.0349	11.4231	30	3.1	27.378	0.251	20.93	5.258	21.34
TR10	Kasigau Road	large	active	A	Sep_16	28	0.61	0.24	3.1	1.0349	11.4231	30	3.1	27.931	0.389	21.41	3.669	20.93
TR10	Kasigau Road	large	active	A	Sep_16	29	0.61	0.24	3.1	1.0349	11.4231	30	3.1	28.329	0.202	20.55	3.421	21.41
TR10	Kasigau Road	large	active	A	Sep_16	30	0.61	0.24	3.1	1.0349	11.4231	30	3.1	27.596	0.506	21.69	4.874	20.55
TR10	Kasigau Road	large	active	A	Oct_16	1	0.61	0.24	3.1	1.0349	11.4231	30	3.1	27.228	0.294	20.74	4.938	21.69
TR10	Kasigau Road	large	active	A	Oct_16	2	0.61	0.24	3.1	1.0349	11.4231	30	3.1	27.342	0.349	20.28	3.846	20.74
TR10	Kasigau Road	large	active	A	Oct_16	3	0.61	0.24	3.1	1.0349	11.4231	30	3.1	27.562	0.27	22.72	5.442	20.28
TR10	Kasigau Road	large	active	A	Oct_16	4	0.61	0.24	3.1	1.0349	11.4231	30	3.1	28.37	0.306	22.38	4.583	22.72
TR10	Kasigau Road	large	active	A	Oct_16	5	0.61	0.24	3.1	1.0349	11.4231	30	3.1	27.947	0.362	21.51	3.604	22.38
TR10	Kasigau Road	large	active	A	Oct_16	6	0.61	0.24	3.1	1.0349	11.4231	30	3.1	27.492	0.19	21.29	4.597	21.51
TR10	Kasigau Road	large	active	A	Oct_16	7	0.61	0.24	3.1	1.0349	11.4231	30	3.1	27.892	0.194	23.12	5.721	21.29
TR10	Kasigau Road	large	active	A	Oct_16	8	0.61	0.24	3.1	1.0349	11.4231	30	3.1	28.234	0.238	22.66	6.063	23.12
TR10	Kasigau Road	large	active	A	Oct_16	9	0.61	0.24	3.1	1.0349	11.4231	30	3.1	28.486	0.198	22.76	4.997	22.66
TR10	Kasigau Road	large	active	A	Oct_16	10	0.61	0.24	3.1	1.0349	11.4231	30	3.1	28.374	0.142	22.04	5.186	22.76
TR10	Kasigau Road	large	active	A	Oct_16	11	0.61	0.24	3.1	1.0349	11.4231	30	3.1	28.421	0.168	22.85	4.977	22.04
TR10	Kasigau Road	large	active	A	Oct_16	12	0.61	0.24	3.1	1.0349	11.4231	30	3.1	27.921	0.39	21.69	5.395	22.85
TR10	Kasigau Road	large	active	A	Oct_16	13	0.61	0.24	3.1	1.0349	11.4231	30	3.1	27.261	0.32	22.1	5.972	21.69
TR10	Kasigau Road	large	active	A	Oct_16	14	0.61	0.24	3.1	1.0349	11.4231	30	3.1	27.461	0.189	22.17	5.112	22.1
TR10	Kasigau Road	large	active	A	Oct_16	15	0.61	0.24	3.1	1.0349	11.4231	30	3.1	27.82	0.183	22.28	5.402	22.17
TR10	Kasigau Road	large	active	A	Oct_16	16	0.61	0.24	3.1	1.0349	11.4231	30	3.1	28.245	0.324	21.86	5.799	22.28
TR10	Kasigau Road	large	active	A	Oct_16	17	0.61	0.24	3.1	1.0349	11.4231	30	3.1	28.156	0.259	21.99	6.012	21.86
TR10	Kasigau Road	large	active	A	Oct_16	18	0.61	0.24	3.1	1.0349	11.4231	30	3.1	28.103	0.182	22.41	5.204	21.99
TR10	Kasigau Road	large	active	A	Oct_16	19	0.61	0.24	3.1	1.0349	11.4231	30	3.1	27.993	0.248	21.89	4.71	22.41
TR10	Kasigau Road	large	active	A	Oct_16	20	0.61	0.24	3.1	1.0349	11.4231	30	3.1	27.281	0.261	21.94	5.195	21.89
TR10	Kasigau Road	large	active	A	Oct_16	21	0.61	0.24	3.1	1.0349	11.4231	30	3.1	27.423	0.191	21.74	5.275	21.94
TR10	Kasigau Road	large	active	A	Oct_16	22	0.61	0.24	3.1	1.0349	11.4231	30	3.1	26.947	0.412	22.26	5.941	21.74
TR10	Kasigau Road	large	active	A	Oct_16	23	0.61	0.24	3.1	1.0349	11.4231	30	3.1	27.187	0.176	23	5.736	22.26
TR10	Kasigau Road	large	active	A	Oct_16	24	0.61	0.24	3.1	1.0349	11.4231	30	3.1	27.774	0.239	21.97	5.13	23
TR10	Kasigau Road	large	active	A	Oct_16	25	0.61	0.24	3.1	1.0349	11.4231	30	3.1	28.343	0.124	21.95	5.259	21.97
TR10	Kasigau Road	large	active	A	Oct_16	26	0.61	0.24	3.1	1.0349	11.4231	30	3.1	28.585	0.164	23.06	4.374	21.95
TR10	Kasigau Road	large	active	A	Oct_16	27	0.61	0.24	3.1	1.0349	11.4231	30	3.1	28.875	0.138	22.66	4.536	23.06
TR10	Kasigau Road	large	active	A	Oct_16	28	0.61	0.24	3.1	1.0349	11.4231	30	3.1	28.884	0.423	22.7	5.008	22.66
TR10	Kasigau Road	large	active	A	Oct_16	29	0.61	0.24	3.1	1.0349	11.4231	30	3.1	28.727	0.212	23.02	6.429	22.7
TR10	Kasigau Road	large	active	A	Oct_16	30	0.61	0.24	3.1	1.0349	11.4231	30	3.1	29.335	0.158	24.17	5.087	23.02
TR10	Kasigau Road	large	active	A	Oct_16	31	0.61	0.24	3.1	1.0349	11.4231	30	3.1	29.764	0.203	24.36	4.902	24.17
TR10	Kasigau Road	large	active	A	Nov_16	1	0.61	0.24	3.1	1.0349	11.4231	30	3.1	29.647	0.131	24.13	4.124	24.36
TR10	Kasigau Road	large	active	A	Nov_16	2	0.61	0.24	3.1	1.0349	11.4231	30	3.1	29.483	0.19	23.35	4.108	24.13
TR10	Kasigau Road	large	active	A	Nov_16	3	0.61	0.24	3.1	1.0349	11.4231	30	3.1	29.577	0.129	23.41	4.684	23.35
TR10	Kasigau Road	large	active	A	Nov_16	4	0.61	0.24	3.1	1.0349	11.4231	30	3.1	29.444	0.167	22.95	4.376	23.41
TR10	Kasigau Road	large	active	A	Nov_16	5	0.61	0.24	3.1	1.0349	11.4231	30	3.1	29.166	0.194	22.84	4.454	22.95
TR10	Kasigau Road	large	active	A	Nov_16	6	0.61	0.24	3.1	1.0349	11.4231	30	3.1	29.219	0.367	23.31	4.79	22.84
TR10	Kasigau Road	large	active	A	Nov_16	7	0.61	0.24	3.1	1.0349	11.4231	30	3.1	28.618	0.268	22.69	5.299	23.31
TR10	Kasigau Road	large	active	A	Nov_16	8	0.61	0.24	3.1	1.0349	11.4231	30	3.1	28.821	0.151	23.49	4.936	22.69
TR10	Kasigau Road	large	active	A	Nov_16	9	0.61	0.24	3.1	1.0349	11.4231	30	3.1	29.213	0.225	23.73	4.532	23.49
TR10	Kasigau Road	large	active	A	Nov_16	10	0.61	0.24	3.1	1.0349	11.4231	30	3.1	28.758	0.474	23.77	4.197	23.73
TR10	Kasigau Road	large	active	A	Nov_16	11	0.61	0.24	3.1	1.0349	11.4231	30	3.1	28.484	0.162	23.79	4.256	23.77
TR10	Kasigau Road	large	active	A	Nov_16	12	0.61	0.24	3.1	1.0349	11.4231	30	3.1	28.782	0.497	22.45	3.164	23.79
TR10	Kasigau Road	large	active	A	Nov_16	13	0.61	0.24	3.1	1.0349	11.4231	30	3.1	27.867	0.257	23.28	4.056	22.45
TR10	Kasigau Road	large	active	A	Nov_16	14	0.61	0.24	3.1	1.0349	11.4231	30	3.1	27.633	0.213	23.59	3.809	23.28
TR10	Kasigau Road	large	active	A	Nov_16	15	0.61	0.24	3.1	1.0349	11.4231	30	3.1	27.938	0.163	22.73	4.305	23.59
TR10	Kasigau Road	large	active	A	Nov_16	16	0.61	0.24	3.1	1.0349	11.4231	30	3.1	28.321	0.188	22.56	3.387	22.73
TR10	Kasigau Road	large	active	A	Nov_16	17	0.61	0.24	3.1	1.0349	11.4231	30	3.1	28.515	0.136	23.32	4.179	22.56
TR10	Kasigau Road	large	active	A	Nov_16	18	0.61	0.24	3.1	1.0349	11.4231	30	3.1	29.047	0.157	24.51	4.338	23.32
TR10	Kasigau Road	large	active	A	Nov_16	19	0.61	0.24	3.1	1.0349	11.4231	30	3.1	29.149	0.18	22.78	3.494	24.51
TR10	Kasigau Road	large	active	A	Nov_16	20	0.61	0.24	3.1	1.0349	11.4231	30	3.1	29.228	0.33	23.45	3.819	22.78
TR10	Kasigau Road	large	active	A	Nov_16	21	0.61	0.24	3.1	1.0349	11.4231	30	3.1	28.332	0.337	23.29	4.153	23.45
TR10	Kasigau Road	large	active	A	Nov_16	22	0.61	0.24	3.1	1.0349	11.4231	30	3.1	27.735	0.212	23.79	4.859	23.29
TR10	Kasigau Road	large	active	A	Nov_16	23	0.61	0.24	3.1	1.0349	11.4231	30	3.1	27.767	0.214	23.19	5.088	23.79
TR10	Kasigau Road	large	active	A	Nov_16	24	0.61	0.24	3.1	1.0349	11.4231	30	3.1	28.288	0.094	23.63	5.255	23.19
TR10	Kasigau Road	large	active	A	Nov_16	25	0.61	0.24	3.1	1.0349	11.4231	30	3.1	28.284	0.34	23.41	4.824	23.63
TR10	Kasigau Road	large	active	A	Nov_16	26	0.61	0.24	3.1	1.0349	11.4231	30	3.1	28.284	0.305	23.89	4.469	23.41
TR10	Kasigau Road	large	active	A	Nov_16	27	0.61	0.24	3.1	1.0349	11.4231	30	3.1	28.07	0.235	23.2	4.237	23.89
TR10	Kasigau Road	large	active	A	Nov_16	28	0.61	0.24	3.1	1.0349	11.4231	30	3.1	28.405	0.052	21.56	2.292	23.2
TR10	Kasigau Road	large	active	A	Nov_16	29	0.61	0.24	3.1	1.0349	11.4231	30	3.1	27.687	0.241	22.58	2.621	21.56
TR10	Kasigau Road	large	active	A	Nov_16	30	0.61	0.24	3.1	1.0349	11.4231	30	3.1	27.494	0.198	22.82	3.282	22.58
TR10	Kasigau Road	large	active	A	Dec_16	1	0.61	0.24	3.1	1.0349	11.4231	30	3.1	27.041	0.191	22.82	3.358	22.82
TR10	Kasigau Road	large	active	A	Dec_16	2	0.61	0.24	3.1	1.0349	11.4231	30	3.1	27.085	0.215	23.81	3.698	22.82
TR10	Kasigau Road	large	active	A	Dec_16	3	0.61	0.24	3.1	1.0349	11.4231	30	3.1	27.695	0.096	22.81	2.969	23.81
TR10	Kasigau Road	large	active	A	Dec_16	4	0.61	0.24	3.1	1.0349	11.4231	30	3.1	27.726	0.121	22.93	3.338	22.81
TR10	Kasigau Road	large	active	A	Dec_16	5	0.61	0.24	3.1	1.0349	11.4231	30	3.1	27.64	0.136	23.43	3.859	22.93
TR10	Kasigau Road	large	active	A	Dec_16	6	0.61	0.24	3.1	1.0349	11.4231	30	3.1	27.382	0.186	23.18	4.065	23.43
TR10	Kasigau Road	large	active	A	Dec_16	7	0.61	0.24	3.1	1.0349	11.4231	30	3.1	27.908	0.385	23.37	3.623	23.18
TR10	Kasigau Road	large	active	A	Dec_16	8	0.61	0.24	3.1	1.0349	11.4231	30	3.1	28.15	0.163	22.64	3.964	23.37
TR10	Kasigau Road	large	active	A	Dec_16	9	0.61	0.24	3.1	1.0349	11.4231	30	3.1	28.274	0.18	23.48	3.975	22.64
TR10	Kasigau Road	large	active	A	Dec_16	10	0.61	0.24	3.1	1.0349	11.4231	30	3.1	28.577	0.07	22.46	4.075	23.48
TR10	Kasigau Road	large	active	A	Dec_16	11	0.61	0.24	3.1	1.0349	11.4231	30	3.1	28.476	0.193	22.44	3.241	22.46
TR10	Kasigau Road	large	active	A	Dec_16	12	0.61	0.24	3.1	1.0349	11.4231	30	3.1	27.812	0.306	22.83	3.515	22.44
TR10	Kasigau Road	large	active	A	Dec_16	13	0.61	0.24	3.1	1.0349	11.4231	30	3.1	27.382	0.138	22.54	3.578	22.83
TR10	Kasigau Road	large	active	A	Dec_16	14	0.61	0.24	3.1	1.0349	11.4231	30	3.1	26.908	0.381	22.78	3.582	22.54
TR10	Kasigau Road	large	active	A	Dec_16	15	0.61	0.24	3.1	1.0349	11.4231	30	3.1	27.345	0.241	23.17	4.341	22.78
TR10	Kasigau Road	large	active	A	Dec_16	16	0.61	0.24	3.1	1.0349	11.4231	30	3.1	27.923	0.175	23.79	4.682	23.17
TR10	Kasigau Road	large	active	A	Dec_16	17	0.61	0.24	3.1	1.0349	11.4231	30	3.1	28.016	0.325	24.28	4.57	23.79
TR10	Kasigau Road	large	active	A	Dec_16	18	0.61	0.24	3.1	1.0349	11.4231	30	3.1	27.411	0.244	24.13	3.967	24.28
TR10	Kasigau Road	large	active	A	Dec_16	19	0.61	0.24	3.1	1.0349	11.4231	30	3.1	27.072	0.334	23.88	4.031	24.13
TR10	Kasigau Road	large	active	A	Dec_16	20	0.61	0.24	3.1	1.0349	11.4231	30	3.1	27.072	0.308	24.53	4.221	23.88
TR10	Kasigau Road	large	active	A	Dec_16	21	0.61	0.24	3.1	1.0349	11.4231	30	3.1	27.57	0.138	23.88	3.873	24.53
TR10	Kasigau Road	large	active	A	Dec_16	22	0.61	0.24	3.1	1.0349	11.4231	30	3.1	28.185	0.466	23.83	3.954	23.88
TR10	Kasigau Road	large	active	A	Dec_16	23	0.61	0.24	3.1	1.0349	11.4231	30	3.1	27.708	0.51	23.25	4.482	23.83
TR10	Kasigau Road	large	active	A	Dec_16	24	0.61	0.24	3.1	1.0349	11.4231	30	3.1	27.44	0.228	23.24	3.609	23.25
TR10	Kasigau Road	large	active	A	Dec_16	25	0.61	0.24	3.1	1.0349	11.4231	30	3.1	27.562	0.197	23.73	4.414	23.24
TR10	Kasigau Road	large	active	A	Dec_16	26	0.61	0.24	3.1	1.0349	11.4231	30	3.1	27.759	0.224	24.32	4.019	23.73
TR10	Kasigau Road	large	active	A	Dec_16	27	0.61	0.24	3.1	1.0349	11.4231	30	3.1	28.316	0.271	24.3	4.135	24.32
TR10	Kasigau Road	large	active	A	Dec_16	28	0.61	0.24	3.1	1.0349	11.4231	30	3.1	28.37	0.192	24.37	5.312	24.3
TR10	Kasigau Road	large	active	A	Dec_16	29	0.61	0.24	3.1	1.0349	11.4231	30	3.1	28.679	0.069	23.05	4.643	24.37
TR10	Kasigau Road	large	active	A	Dec_16	30	0.61	0.24	3.1	1.0349	11.4231	30	3.1	28.718	0.12	22.59	2.783	23.05
TR10	Kasigau Road	large	active	A	Dec_16	31	0.61	0.24	3.1	1.0349	11.4231	30	3.1	28.023	0.302	23.45	3.575	22.59
TR10	Kasigau Road	large	active	A	Jan_17	1	0.61	0.24	3.1	1.0349	11.4231	30	3.1	27.48	0.287	22.7	3.169	23.45
TR10	Kasigau Road	large	active	A	Jan_17	2	0.61	0.24	3.1	1.0349	11.4231	30	3.1	26.813	0.167	24.15	4.251	22.7
TR10	Kasigau Road	large	active	A	Jan_17	3	0.61	0.24	3.1	1.0349	11.4231	30	3.1	26.72	0.24	24.22	4.063	24.15
TR10	Kasigau Road	large	active	A	Jan_17	4	0.61	0.24	3.1	1.0349	11.4231	30	3.1	26.846	0.432	23.97	4.114	24.22
TR10	Kasigau Road	large	active	A	Jan_17	5	0.61	0.24	3.1	1.0349	11.4231	30	3.1	26.632	0.22	23.66	4.371	23.97
TR10	Kasigau Road	large	active	A	Jan_17	6	0.61	0.24	3.1	1.0349	11.4231	30	3.1	27.229	0.097	23.87	4.556	23.66
TR10	Kasigau Road	large	active	A	Jan_17	7	0.61	0.24	3.1	1.0349	11.4231	30	3.1	27.179	0.329	24.76	5.18	23.87
TR10	Kasigau Road	large	active	A	Jan_17	8	0.61	0.24	3.1	1.0349	11.4231	30	3.1	27.593	0.116	25.61	4.724	24.76
TR10	Kasigau Road	large	active	A	Jan_17	9	0.61	0.24	3.1	1.0349	11.4231	30	3.1	27.956	0.495	24.83	3.582	25.61
TR10	Kasigau Road	large	active	A	Jan_17	10	0.61	0.24	3.1	1.0349	11.4231	30	3.1	27.539	0.319	23.45	3.675	24.83
TR10	Kasigau Road	large	active	A	Jan_17	11	0.61	0.24	3.1	1.0349	11.4231	30	3.1	26.65	0.55	23.12	4.144	23.45
TR10	Kasigau Road	large	active	A	Jan_17	12	0.61	0.24	3.1	1.0349	11.4231	30	3.1	26.002	0.447	23.68	4.889	23.12
TR10	Kasigau Road	large	active	A	Jan_17	13	0.61	0.24	3.1	1.0349	11.4231	30	3.1	26.589	0.19	24.29	5.014	23.68
TR10	Kasigau Road	large	active	A	Jan_17	14	0.61	0.24	3.1	1.0349	11.4231	30	3.1	27.05	0.463	25.13	5.111	24.29
TR10	Kasigau Road	large	active	A	Jan_17	15	0.61	0.24	3.1	1.0349	11.4231	30	3.1	27.547	0.168	24.91	4.904	25.13
TR10	Kasigau Road	large	active	A	Jan_17	16	0.61	0.24	3.1	1.0349	11.4231	30	3.1	27.973	0.504	23.59	4.84	24.91
TR10	Kasigau Road	large	active	A	Jan_17	17	0.61	0.24	3.1	1.0349	11.4231	30	3.1	27.492	0.205	23.43	4.614	23.59
TR10	Kasigau Road	large	active	A	Jan_17	18	0.61	0.24	3.1	1.0349	11.4231	30	3.1	27.751	0.165	24.41	4.222	23.43
TR10	Kasigau Road	large	active	A	Jan_17	19	0.61	0.24	3.1	1.0349	11.4231	30	3.1	28.182	0.292	25.34	4.844	24.41
TR10	Kasigau Road	large	active	A	Jan_17	20	0.61	0.24	3.1	1.0349	11.4231	30	3.1	28.163	0.283	24.74	5.107	25.34
TR10	Kasigau Road	large	active	A	Jan_17	21	0.61	0.24	3.1	1.0349	11.4231	30	3.1	28.679	0.093	24.58	4.469	24.74
TR10	Kasigau Road	large	active	A	Jan_17	22	0.61	0.24	3.1	1.0349	11.4231	30	3.1	28.648	0.219	24.22	4.147	24.58
TR10	Kasigau Road	large	active	A	Jan_17	23	0.61	0.24	3.1	1.0349	11.4231	30	3.1	28.431	0.241	23.75	4.432	24.22
TR10	Kasigau Road	large	active	A	Jan_17	24	0.61	0.24	3.1	1.0349	11.4231	30	3.1	28.103	0.316	24.81	5.889	23.75
TR10	Kasigau Road	large	active	A	Jan_17	25	0.61	0.24	3.1	1.0349	11.4231	30	3.1	28.37	0.24	25.34	5.163	24.81
TR10	Kasigau Road	large	active	A	Jan_17	26	0.61	0.24	3.1	1.0349	11.4231	30	3.1	28.149	0.35	24.67	5.171	25.34
TR10	Kasigau Road	large	active	A	Jan_17	27	0.61	0.24	3.1	1.0349	11.4231	30	3.1	28.374	0.142	25.4	4.423	24.67
TR10	Kasigau Road	large	active	A	Jan_17	28	0.61	0.24	3.1	1.0349	11.4231	30	3.1	28.64	0.146	25.03	4.238	25.4
TR10	Kasigau Road	large	active	A	Jan_17	29	0.61	0.24	3.1	1.0349	11.4231	30	3.1	29.001	0.335	25.55	4.544	25.03
TR10	Kasigau Road	large	active	A	Jan_17	30	0.61	0.24	3.1	1.0349	11.4231	30	3.1	28.992	0.405	25.94	4.631	25.55
TR10	Kasigau Road	large	active	A	Jan_17	31	0.61	0.24	3.1	1.0349	11.4231	30	3.1	29.415	0.321	23.51	2.629	25.94
TR10	Kasigau Road	large	active	A	Feb_17	1	0.61	0.24	3.1	1.0349	11.4231	30	3.1	28.463	0.371	24.51	4.589	23.51
TR10	Kasigau Road	large	active	A	Feb_17	2	0.61	0.24	3.1	1.0349	11.4231	30	3.1	28.476	0.195	24.78	4.552	24.51
TR10	Kasigau Road	large	active	A	Feb_17	3	0.61	0.24	3.1	1.0349	11.4231	30	3.1	28.517	0.23	25.57	5.118	24.78
TR10	Kasigau Road	large	active	A	Feb_17	4	0.61	0.24	3.1	1.0349	11.4231	30	3.1	28.759	0.262	25.05	4.39	25.57
TR10	Kasigau Road	large	active	A	Feb_17	5	0.61	0.24	3.1	1.0349	11.4231	30	3.1	28.174	0.565	23.96	4.514	25.05
TR10	Kasigau Road	large	active	A	Feb_17	6	0.61	0.24	3.1	1.0349	11.4231	30	3.1	28.143	0.33	23.33	4.289	23.96
TR10	Kasigau Road	large	active	A	Feb_17	7	0.61	0.24	3.1	1.0349	11.4231	30	3.1	28.219	0.131	24.18	4.204	23.33
TR10	Kasigau Road	large	active	A	Feb_17	8	0.61	0.24	3.1	1.0349	11.4231	30	3.1	28.251	0.347	23.83	3.981	24.18
TR10	Kasigau Road	large	active	A	Feb_17	9	0.61	0.24	3.1	1.0349	11.4231	30	3.1	28.009	0.284	24	4.148	23.83
TR10	Kasigau Road	large	active	A	Feb_17	10	0.61	0.24	3.1	1.0349	11.4231	30	3.1	27.921	0.298	23.5	3.595	24
TR10	Kasigau Road	large	active	A	Feb_17	11	0.61	0.24	3.1	1.0349	11.4231	30	3.1	27.767	0.223	23.6	4.798	23.5
TR10	Kasigau Road	large	active	A	Feb_17	12	0.61	0.24	3.1	1.0349	11.4231	30	3.1	27.83	0.27	23.83	6.749	23.6
TR10	Kasigau Road	large	active	A	Feb_17	13	0.61	0.24	3.1	1.0349	11.4231	30	3.1	28.53	0.139	24.34	5.381	23.83
TR10	Kasigau Road	large	active	A	Feb_17	14	0.61	0.24	3.1	1.0349	11.4231	30	3.1	29.096	0.3	24.5	4.38	24.34
TR10	Kasigau Road	large	active	A	Feb_17	15	0.61	0.24	3.1	1.0349	11.4231	30	3.1	28.952	0.25	24.53	5.16	24.5
TR10	Kasigau Road	large	active	A	Feb_17	16	0.61	0.24	3.1	1.0349	11.4231	30	3.1	28.687	0.464	24.03	5.625	24.53
TR10	Kasigau Road	large	active	A	Feb_17	17	0.61	0.24	3.1	1.0349	11.4231	30	3.1	28.616	0.185	25.01	5.63	24.03
TR10	Kasigau Road	large	active	A	Feb_17	18	0.61	0.24	3.1	1.0349	11.4231	30	3.1	29.319	0.105	24.93	4.821	25.01
TR10	Kasigau Road	large	active	A	Feb_17	19	0.61	0.24	3.1	1.0349	11.4231	30	3.1	29.195	0.382	24.45	4.714	24.93
TR10	Kasigau Road	large	active	A	Feb_17	20	0.61	0.24	3.1	1.0349	11.4231	30	3.1	28.007	0.567	23.58	3.719	24.45
TR10	Kasigau Road	large	active	A	Feb_17	21	0.61	0.24	3.1	1.0349	11.4231	30	3.1	26.799	0.607	24.54	4.684	23.58
TR10	Kasigau Road	large	active	A	Feb_17	22	0.61	0.24	3.1	1.0349	11.4231	30	3.1	27.312	0.2	24.03	3.938	24.54
TR10	Kasigau Road	large	active	A	Feb_17	23	0.61	0.24	3.1	1.0349	11.4231	30	3.1	27.666	0.435	25.26	3.907	24.03
TR10	Kasigau Road	large	active	A	Feb_17	24	0.61	0.24	3.1	1.0349	11.4231	30	3.1	28.961	0.396	25.35	4.045	25.26
TR10	Kasigau Road	large	active	A	Feb_17	25	0.61	0.24	3.1	1.0349	11.4231	30	3.1	29.306	0.232	25.01	4.77	25.35
TR10	Kasigau Road	large	active	A	Feb_17	26	0.61	0.24	3.1	1.0349	11.4231	30	3.1	29.485	0.202	24.8	5.238	25.01
TR10	Kasigau Road	large	active	A	Feb_17	27	0.61	0.24	3.1	1.0349	11.4231	30	3.1	29.702	0.162	25.25	4.481	24.8
TR10	Kasigau Road	large	active	A	Feb_17	28	0.61	0.24	3.1	1.0349	11.4231	30	3.1	29.47	0.321	24.96	4.359	25.25
TR10	Kasigau Road	large	active	A	Mar_17	1	0.61	0.24	3.1	1.0349	11.4231	30	3.1	29.1	0.227	24.36	3.972	24.96
TR10	Kasigau Road	large	active	A	Mar_17	2	0.61	0.24	3.1	1.0349	11.4231	30	3.1	29.016	0.375	23.97	5.604	24.36
TR10	Kasigau Road	large	active	A	Mar_17	3	0.61	0.24	3.1	1.0349	11.4231	30	3.1	29.321	0.194	24.76	5.374	23.97
TR10	Kasigau Road	large	active	A	Mar_17	4	0.61	0.24	3.1	1.0349	11.4231	30	3.1	29.322	0.257	23.35	3.669	24.76
TR10	Kasigau Road	large	active	A	Mar_17	5	0.61	0.24	3.1	1.0349	11.4231	30	3.1	28.993	0.411	25.59	5.689	23.35
TR10	Kasigau Road	large	active	A	Mar_17	6	0.61	0.24	3.1	1.0349	11.4231	30	3.1	29.514	0.133	26.55	5.668	25.59
TR10	Kasigau Road	large	active	A	Mar_17	7	0.61	0.24	3.1	1.0349	11.4231	30	3.1	29.952	0.397	27.22	5.503	26.55
TR10	Kasigau Road	large	active	A	Mar_17	8	0.61	0.24	3.1	1.0349	11.4231	30	3.1	29.92	0.38	25.83	5.799	27.22
TR10	Kasigau Road	large	active	A	Mar_17	9	0.61	0.24	3.1	1.0349	11.4231	30	3.1	29.664	0.23	25.9	5.733	25.83
TR10	Kasigau Road	large	active	A	Mar_17	10	0.61	0.24	3.1	1.0349	11.4231	30	3.1	29.921	0.144	26.86	5.059	25.9
TR10	Kasigau Road	large	active	A	Mar_17	11	0.61	0.24	3.1	1.0349	11.4231	30	3.1	29.835	0.362	25.19	4.89	26.86
TR10	Kasigau Road	large	active	A	Mar_17	12	0.61	0.24	3.1	1.0349	11.4231	30	3.1	29.43	0.365	24.26	4.622	25.19
TR10	Kasigau Road	large	active	A	Mar_17	13	0.61	0.24	3.1	1.0349	11.4231	30	3.1	29.163	0.279	25.68	6.043	24.26
TR10	Kasigau Road	large	active	A	Mar_17	14	0.61	0.24	3.1	1.0349	11.4231	30	3.1	29.366	0.139	25.12	4.842	25.68
TR10	Kasigau Road	large	active	A	Mar_17	15	0.61	0.24	3.1	1.0349	11.4231	30	3.1	29.319	0.091	25.65	4.516	25.12
TR10	Kasigau Road	large	active	A	Mar_17	16	0.61	0.24	3.1	1.0349	11.4231	30	3.1	29.608	0.121	25.46	5.104	25.65
TR10	Kasigau Road	large	active	A	Mar_17	17	0.61	0.24	3.1	1.0349	11.4231	30	3.1	29.718	0.246	24.56	5.413	25.46
TR10	Kasigau Road	large	active	A	Mar_17	18	0.61	0.24	3.1	1.0349	11.4231	30	3.1	28.797	0.47	22.52	3.232	24.56
TR10	Kasigau Road	large	active	A	Mar_17	19	0.61	0.24	3.1	1.0349	11.4231	30	3.1	28.413	0.2	24.42	3.989	22.52
TR10	Kasigau Road	large	active	A	Mar_17	20	0.61	0.24	3.1	1.0349	11.4231	30	3.1	28.851	0.359	24.3	4.401	24.42
TR10	Kasigau Road	large	active	A	Mar_17	21	0.61	0.24	3.1	1.0349	11.4231	30	3.1	29.413	0.15	25	3.975	24.3
TR10	Kasigau Road	large	active	A	Mar_17	22	0.61	0.24	3.1	1.0349	11.4231	30	3.1	29.694	0.183	24.64	4.032	25
TR10	Kasigau Road	large	active	A	Mar_17	23	0.61	0.24	3.1	1.0349	11.4231	30	3.1	29.506	0.186	23.77	3.977	24.64
TR10	Kasigau Road	large	active	A	Mar_17	24	0.61	0.24	3.1	1.0349	11.4231	30	3.1	29.438	0.222	24.56	4.218	23.77
TR10	Kasigau Road	large	active	A	Mar_17	25	0.61	0.24	3.1	1.0349	11.4231	30	3.1	29.507	0.079	25.85	4.456	24.56
TR10	Kasigau Road	large	active	A	Mar_17	26	0.61	0.24	3.1	1.0349	11.4231	30	3.1	29.788	0.044	25.72	4.243	25.85
TR10	Kasigau Road	large	active	A	Mar_17	27	0.61	0.24	3.1	1.0349	11.4231	30	3.1	29.483	0.195	24.35	3.353	25.72
TR10	Kasigau Road	large	active	A	Mar_17	28	0.61	0.24	3.1	1.0349	11.4231	30	3.1	28.546	0.246	24.22	3.828	24.35
TR10	Kasigau Road	large	active	A	Mar_17	29	0.61	0.24	3.1	1.0349	11.4231	30	3.1	28.331	0.305	22.55	3.838	24.22
TR10	Kasigau Road	large	active	A	Mar_17	30	0.61	0.24	3.1	1.0349	11.4231	30	3.1	27.995	0.322	24.15	4.364	22.55
TR10	Kasigau Road	large	active	A	Mar_17	31	0.61	0.24	3.1	1.0349	11.4231	30	3.1	28.435	0.284	24.02	4.141	24.15
TR101	Kasigau Road	large	active	A	Mar_16	1	0.69	1	3.1	3.7783	18.8549	23	2.9	29.543	0.253	23.43	3.973	22.89
TR101	Kasigau Road	large	active	A	Mar_16	2	0.69	1	3.1	3.7783	18.8549	23	2.9	29.024	0.34	24.92	5.164	23.43
TR101	Kasigau Road	large	active	A	Mar_16	3	0.69	1	3.1	3.7783	18.8549	23	2.9	29.578	0.389	24.8	3.991	24.92
TR101	Kasigau Road	large	active	A	Mar_16	4	0.69	1	3.1	3.7783	18.8549	23	2.9	29.727	0.53	25.01	4.385	24.8
TR101	Kasigau Road	large	active	A	Mar_16	5	0.69	1	3.1	3.7783	18.8549	23	2.9	29.274	0.404	24.28	5.121	25.01
TR101	Kasigau Road	large	active	A	Mar_16	6	0.69	1	3.1	3.7783	18.8549	23	2.9	29.56	0.389	25.24	5.036	24.28
TR101	Kasigau Road	large	active	A	Mar_16	7	0.69	1	3.1	3.7783	18.8549	23	2.9	30.101	0.32	25.41	4.452	25.24
TR101	Kasigau Road	large	active	A	Mar_16	8	0.69	1	3.1	3.7783	18.8549	23	2.9	30.101	0.437	25.67	5.154	25.41
TR101	Kasigau Road	large	active	A	Mar_16	9	0.69	1	3.1	3.7783	18.8549	23	2.9	30.258	0.284	24.48	3.963	25.67
TR101	Kasigau Road	large	active	A	Mar_16	10	0.69	1	3.1	3.7783	18.8549	23	2.9	29.207	0.928	22.8	4.435	24.48
TR101	Kasigau Road	large	active	A	Mar_16	11	0.69	1	3.1	3.7783	18.8549	23	2.9	28.779	0.357	25.63	4.472	22.8
TR101	Kasigau Road	large	active	A	Mar_16	12	0.69	1	3.1	3.7783	18.8549	23	2.9	29.504	0.229	25.95	4.289	25.63
TR101	Kasigau Road	large	active	A	Mar_16	13	0.69	1	3.1	3.7783	18.8549	23	2.9	28.845	0.458	24.95	6.024	25.95
TR101	Kasigau Road	large	active	A	Mar_16	14	0.69	1	3.1	3.7783	18.8549	23	2.9	29.052	0.417	25.95	4.829	24.95
TR101	Kasigau Road	large	active	A	Mar_16	15	0.69	1	3.1	3.7783	18.8549	23	2.9	29.251	0.421	25.48	5.016	25.95
TR101	Kasigau Road	large	active	A	Mar_16	16	0.69	1	3.1	3.7783	18.8549	23	2.9	29.663	0.65	25.93	5.507	25.48
TR101	Kasigau Road	large	active	A	Mar_16	17	0.69	1	3.1	3.7783	18.8549	23	2.9	29.883	0.415	25.44	4.363	25.93
TR101	Kasigau Road	large	active	A	Mar_16	18	0.69	1	3.1	3.7783	18.8549	23	2.9	30.062	0.455	26.16	3.938	25.44
TR101	Kasigau Road	large	active	A	Mar_16	19	0.69	1	3.1	3.7783	18.8549	23	2.9	29.587	0.566	25.19	4.529	26.16
[truncated: 3,545 more rows]
