# Supplementary material for: Termite mound architecture regulates nest temperature and correlates with species identities of symbiotic fungi
Source: PeerJ. 2019 Jan 16;6:e6237. doi: 10.7717/peerj.6237 (PMC6339472; doi:10.7717/peerj.6237)
Supplement: Supplemental Information 7 — Mound dimensions (height, mean basal width), ventilation types (open or closed) and cultivated Termitomyces species (A, B or C) of 164 termite colonies. [file peerj-07-6237-s007.xlsx]

## Sheet: Dimensions_and_fungal_species_1
site	name	mound_type	fungi_sp	mound_height	mound_mean_width
Bungule	TK01	open	A	60	250
Bungule	TK02	open	A	90	200
Bungule	TK04	open	A	170	350
Bungule	TK05	open	A	90	280
Bungule	TK06	open	A	130	240
Bungule	TK07	open	A	130	230
Bungule	TK08	open	A	100	290
Bungule	TK09	open	A	90	210
Bungule	TK10	open	A	70	340
Bungule	TK11	open	A	80	340
Bungule	TK12	open	A	120	310
Bungule	TK13	open	A	70	250
Bungule	TK14	open	A	70	270
Bungule	TK15	open	A	190	430
Bungule	TK16	open	A	70	180
Bungule	TK17	open	A	130	280
Bungule	TK18	open	A	80	280
Bungule	TK19	open	A	70	240
Bungule	TK20	open	A	130	330
Bungule	TK21	open	A	110	260
Bungule	TK22	open	A	100	340
Bungule	TK23	open	A	80	300
Kasigau Road	K1	open	C	35	100
Kasigau Road	TR009	open	C	20	126
Kasigau Road	TR010	open	A	24	310
Kasigau Road	TR083	open	A	140	230
Kasigau Road	TR101	open	A	100	310
Kasigau Road	TR109	open	A	175	310
Kasigau Road	TR149	closed	A	140	320
Kasigau Road	TR154	open	A	80	165
Kasigau Road	TR156	open	A	105	215
Kasigau Road	TR159	closed	A	100	420
Kasigau Road	TR160	closed	A	35	65
Kasigau Road	TR161	open	A	30	190
Kasigau Road	TR164	closed	A	100	235
Kasigau Road	TR166	closed	C	70	305
Kasigau Road	TR167	open	A	80	335
Kasigau Road	TR168	closed	C	185	285
Kasigau Road	TR172	open	C	10	81
Kasigau Road	TR173	closed	A	30	365
Kasigau Road	TR175	closed	C	70	140
Kasigau Road	TR182	open	A	0	90
Kasigau Road	TR183	open	C	20	78.5
Kasigau Road	TR184	open	A	15	110
Kasigau Road	TR185	open	A	15	80
Latika	TT01	open	C	105	305
Latika	TT02	open	A	170	340
Lions Bluff	TL01	open	A	95	330
Lions Bluff	TL02	open	A	110	415
Lions Bluff	TL05	open	C	65	252.5
Lions Bluff	TL06	open	A	150	340
Lions Bluff	TL07	open	A	70	292.5
Lions Bluff	TL08	open	A	145	300
Lions Bluff	TL09	closed	C	75	161.5
Lions Bluff	TL10	closed	A	95	245
Lions Bluff	TL11	closed	A	85	130
Lions Bluff	TL12	closed	C	30	130
Lions Bluff	TL13	closed	A	70	137.5
Lions Bluff	TL14	closed	C	90	160
Lions Bluff	TL15	open	C	70	305
Lions Bluff	TL16	open	C	75	297.5
Lions Bluff	TL17	open	A	85	270
Lions Bluff	TL18	open	A	160	302.5
Maktau	TD01	open	A	245	340
Maktau	TM02	open	A	150	300
Maktau	TM04	open	B	160	150
Maktau	TM07	open	B	140	355
Maktau	TM08	open	C	55	170
Maktau	TM10	open	A	180	250
Maktau	TM14	open	A	120	330
Maktau	TM15	open	A	190	350
Maktau	TM16	open	A	120	315
Maktau	TM19	open	B	160	250
Maktau	TM23	open	A	90	200
Maktau	TM25	open	A	120	300
Maktau	TM26	open	A	30	120
Maktau	TM33	open	A	140	450
Maktau	TM35	open	B	180	320
Maktau	TM36	open	C	25	141
Maktau	TM37	open	C	55	220
Maktau	TM39	open	B	160	275
Maktau	TM41	open	B	120	250
Maktau	TM42	open	A	130	300
Mbula	MR1	closed	C	50	300
Mbula	MR2	open	A	15	130
Mbula	MR4	open	A	45	180
Mbula	MR5	open	A	25	60
Mbula	MR6	open	C	30	80
Mbula	TB02	open	B	170	300
Mbula	TB03	open	A	290	160
Mbula	TB04	open	C	60	230
Mbula	TB06	open	A	120	340
Mbula	TB07	open	A	130	350
Mbula	TB08	closed	A	150	350
Mbula	TB10	open	C	20	200
Mbula	TB26	open	A	220	315
Mbula	TB33	closed	A	130	350
Mbula	TB35	open	A	150	340
Mbula	TB36	open	A	150	280
Mgeno	TA01	open	A	60	340
Mgeno	TA02	open	B	70	330
Mgeno	TA05	open	A	110	350
Mgeno	TA06	open	A	100	300
Mgeno	TA11	open	A	60	350
Mgeno	TA12	open	A	70	250
Mgeno	TA19	open	A	170	350
Mgeno	TA21	open	A	80	200
Mgeno	TA26	open	A	80	300
Mgeno	TA29	open	C	15	130
Mgeno	TA30	open	A	40	300
Mgeno	TA31	open	A	160	300
Mgeno	TA32	open	A	110	370
Mgeno	TA36	open	A	100	350
Mgeno	TY01	open	A	60	300
Mgeno	TY02	open	A	135	385
Mgeno	TY04	open	C	120	460
Mgeno	TY06	open	A	150	400
Mgeno	TY09	open	C	100	300
Mgeno	TY11	open	A	130	300
Mgeno	TY12	open	A	180	250
Mgeno	TY13	open	A	120	200
Mgeno	TY14	open	A	160	250
Mgeno	TY17	open	A	150	300
Mwashoti	TFA11	open	A	100	380
Mwashoti	TFA12	open	A	70	295
Mwashoti	TFA13	open	A	130	435
Mwashoti	TFA14	open	A	160	260
Mwashoti	TFA18	open	A	110	315
Mwashoti	TFA21	open	A	100	345
Mwashoti	TFA28	open	A	40	123
Mwashoti	TFA35	open	C	90	202.5
Mwashoti	TFA48	open	A	110	345
Mwashoti	TFA49	open	A	90	395
Mwashoti	TFB20	open	A	135	350
Mwashoti	TFB34	open	A	100	360
Mwashoti	TFB50	open	A	100	445
Mwashuma	TU01	closed	C	200	350
Mwashuma	TU02	closed	A	190	270
Salt Lick	S1	closed	C	70	220
Salt Lick	S5	open	C	40	200
Salt Lick	TS008	open	A	120	480
Salt Lick	TS009	open	A	130	450
Salt Lick	TS010	open	A	90	280
Salt Lick	TS012	closed	A	130	450
Salt Lick	TS013	closed	A	170	250
Salt Lick	TS014	open	A	125	370
Salt Lick	TS015	closed	A	120	360
Salt Lick	TS016	closed	C	100	595
Salt Lick	TS018	closed	A	120	350
Salt Lick	TS019	closed	A	140	400
Salt Lick	TS020	open	A	120	350
Salt Lick	TS022	closed	C	120	435
Salt Lick	TS056	open	A	120	315
Salt Lick	TS200	open	A	210	440
Salt Lick	TS201	open	A	220	315
Salt Lick	TS202	open	C	75	340
Salt Lick	TS203	open	A	85	360
Salt Lick	TS204	open	A	150	370
Salt Lick	TS205	open	A	135	370
Salt Lick	TS206	open	A	100	320
Salt Lick	TS207	open	C	160	265
Salt Lick	TS208	open	A	70	110
Sasha Camp	TH01	open	C	140	345
Sasha Camp	TH04	open	A	340	400
