# Supplementary material for: Termite mound architecture regulates nest temperature and correlates with species identities of symbiotic fungi
Source: PeerJ journal article supplement (doi:10.7717/peerj.6237), 2019-01-16
Supplement: Supplementary_figure_S1.pdf [file Supplementary_figure_S1.pdf]

## Miniature mounds

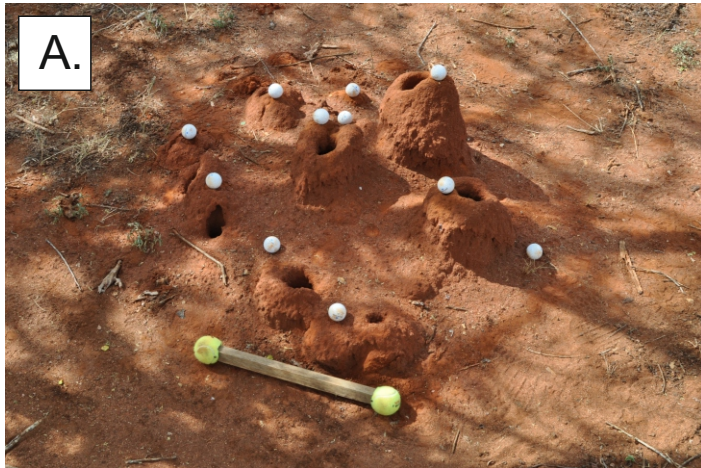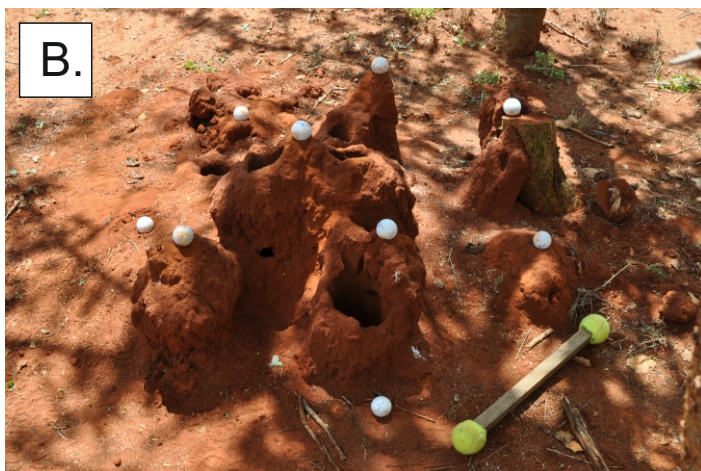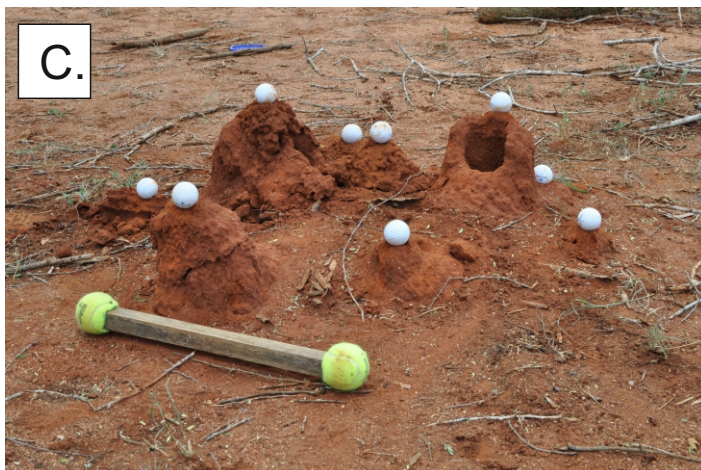

## Large mounds

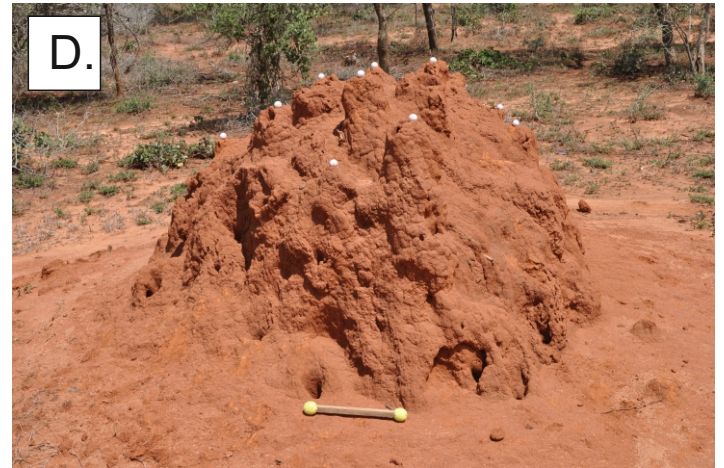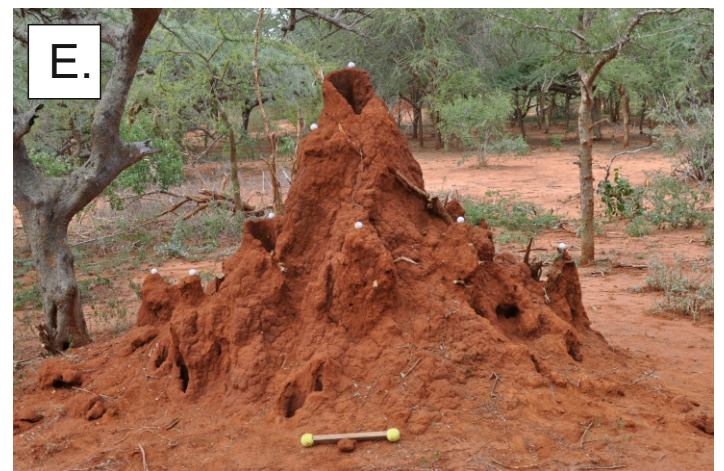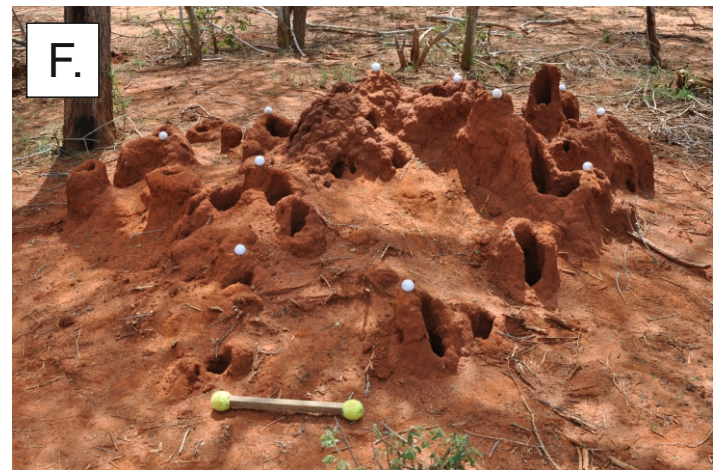

**Supplementary Figure S1.** *Macrotermes subhyalinus* mounds in category 'miniature' (A–C) and 'large' (D–F). A: TR182, B: TR09, C: TR184, D: TM10, E: TR101, F: TR10. Length of the scale bar in each image is 45 cm and the diameter of the spherical targets (golf balls) is 4.2 cm. Photos by Risto Vesala.
